# Supplementary material for: Retention time prediction and MRM validation reinforce the biomarker identification of LC-MS based phospholipidomics
Source: Royal Society of Chemistry journal article supplement (doi:10.1039/d3an01735d), 2023-11-30
Supplement: d3an01735d1.xlsx [file d3an01735d1.xlsx]

## Sheet: Table contents
Table Contents
Table.S1 Retention time (RT) of deuterated internal standards.
Table.S2 Regressive curve of different subclass of phospholipids (y=B0+B1x+B2x2).
Table.S3 Regressive curve of different subclass of lysophopholipids (y=B0+B1x+B2x2).
Table.S4 MRM transition of lipids and deuterated internal standards.
Table.S5 Expected and detected retention time of phospholipids.
Table.S6 Phospholipidomics of sorafenib resistant HCC cell lines.
Table.S7 Phospholipids with VIP>1 from OPLS-DA analysis of MHCC97H(1) and Hep3B(2).
Table.S8 Phospholipids with p (corr)>0.6 from OPLS-DA analysis of MHCC97H(1) and Hep3B(2).
Table.S9 Phospholipids with p (corr)<-0.5 from OPLS-DA analysis of MHCC97H(1) and Hep3B(2).

## Sheet: Table.S1
Table.S1 Retention time(RT) of deuterated internal standards
Component Name	Carbon number	Double bonds	RT-1	RT-2	RT-3	RT-4	RT-5	Mean RT	Relative carbon number	Relative RT
17:0-14:1 PC-d5+AcO.IS	31	1	5.39	5.39	5.39	5.4	5.39	5.392	0.72093	0.317176
17:0-16:1 PC-d5+AcO.IS	33	1	5.8	5.81	5.81	5.81	5.81	5.808	0.767442	0.341647
17:0-18:1 PC-d5+AcO.IS	35	1	6.28	6.29	6.3	6.3	6.3	6.294	0.813953	0.370235
17:0-20:3 PC-d5+AcO.IS	37	3	6.04	6.05	6.05	6.05	6.05	6.048	0.860465	0.355765
17:0-22:4 PC-d5+AcO.IS	39	4	6.19	6.2	6.21	6.21	6.21	6.204	0.906977	0.364941
17:0-14:1 PE-d5.IS	31	1	5.46	5.45	5.46	5.46	5.46	5.458	0.72093	0.321059
17:0-16:1 PE-d5.IS	33	1	5.87	5.88	5.88	5.89	5.89	5.882	0.767442	0.346
17:0-18:1 PE-d5.IS	35	1	6.37	6.38	6.39	6.39	6.39	6.384	0.813953	0.375529
17:0-20:3 PE-d5.IS	37	3	6.12	6.13	6.14	6.13	6.14	6.132	0.860465	0.360706
17:0-22:4 PE-d5.IS	39	4	6.27	6.29	6.29	6.29	6.3	6.288	0.906977	0.369882
17:0-14:1 PG-d5.IS	31	1	4.77	4.77	4.77	4.77	4.77	4.77	0.72093	0.280588
17:0-16:1 PG-d5.IS	33	1	5.07	5.07	5.07	5.07	5.07	5.07	0.767442	0.298235
17:0-18:1 PG-d5.IS	35	1	5.39	5.39	5.4	5.4	5.39	5.394	0.813953	0.317294
17:0-20:3 PG-d5.IS	37	3	5.23	5.24	5.24	5.23	5.24	5.236	0.860465	0.308
17:0-22:4 PG-d5.IS	39	4	5.34	5.34	5.34	5.34	5.34	5.34	0.906977	0.314118
17:0-14:1 PS-d5.IS	31	1	4.77	4.78	4.78	4.77	4.77	4.774	0.72093	0.280824
17:0-16:1 PS-d5.IS	33	1	5.08	5.08	5.08	5.08	5.08	5.08	0.767442	0.298824
17:0-18:1 PS-d5.IS	35	1	5.41	5.41	5.41	5.42	5.41	5.412	0.813953	0.318353
17:0-20:3 PS-d5.IS	37	3	5.26	5.25	5.25	5.25	5.26	5.254	0.860465	0.309059
17:0-22:4 PS-d5.IS	39	4	5.36	5.36	5.36	5.36	5.36	5.36	0.906977	0.315294
17:0-14:1 PI-d5.IS	31	1	4.72	4.72	4.72	4.72	4.72	4.72	0.72093	0.277647
17:0-16:1 PI-d5.IS	33	1	5.02	5.03	5.03	5.03	5.03	5.028	0.767442	0.295765
17:0-18:1 PI-d5.IS	35	1	5.34	5.35	5.35	5.35	5.35	5.348	0.813953	0.314588
17:0-20:3 PI-d5.IS	37	3	5.19	5.19	5.19	5.19	5.2	5.192	0.860465	0.305412
17:0-22:4 PI-d5.IS	39	4	5.3	5.3	5.3	5.3	5.3	5.3	0.906977	0.311765
15:0 Lyso PI-d5.IS	15	0	1.13	1.12	1.13	1.13	1.13	1.128	0.348837	0.0663529
17:0 Lyso PI-d5.IS	17	0	1.93	1.91	1.92	1.92	1.92	1.92	0.395349	0.112941
19:0 Lyso PI-d5.IS	19	0	2.9	2.89	2.91	2.9	2.89	2.898	0.44186	0.170471
15:0 Lyso PS-d5.IS	15	0	1.17	1.18	1.17	1.18	1.17	1.174	0.348837	0.0690588
17:0 Lyso PS-d5.IS	17	0	2.01	2	2	1.99	2	2	0.395349	0.117647
19:0 Lyso PS-d5.IS	19	0	2.99	2.97	2.98	2.97	2.97	2.976	0.44186	0.175059
15:0 Lyso PG-d5.IS	15	0	1.2	1.19	1.2	1.21	1.2	1.2	0.348837	0.0705882
17:0 Lyso PG-d5.IS	17	0	2.09	2.07	2.08	2.08	2.08	2.08	0.395349	0.122353
19:0 Lyso PG-d5.IS	19	0	2.99	2.98	2.98	2.98	2.99	2.984	0.44186	0.175529
15:0 Lyso PC-d5.IS	15	0	1.85	1.84	1.85	1.85	1.85	1.848	0.348837	0.108706
17:0 Lyso PC-d5.IS	17	0	2.93	2.92	2.92	2.92	2.92	2.922	0.395349	0.171882
19:0 Lyso PC-d5.IS	19	0	3.73	3.73	3.73	3.72	3.72	3.726	0.44186	0.219176
15:0 Lyso PE-d5.IS	15	0	1.96	1.94	1.94	1.94	1.94	1.944	0.348837	0.114353
17:0 Lyso PE-d5.IS	17	0	3.01	3	3	3	3	3.002	0.395349	0.176588
19:0 Lyso PE-d5.IS	19	0	3.8	3.79	3.79	3.79	3.79	3.792	0.44186	0.223059

## Sheet: Table.S2
Table.S2 Regressive curve of different subclass of phopholipids(y=B0+B1x+B2x2).
	PA X:0	PA X:1	PA X:2	PA X:3	PA X:4	PA X:5	PA X:6	PA X:7	PA X:8
B0	0.1781	0.1677	0.1579	0.1487	0.14	0.1319	0.1241	0.1169	0.1101
B1	-0.1411	-0.1328	-0.1251	-0.1178	-0.1109	-0.1044	-0.09831	-0.09256	-0.08719
B2	0.411	0.387	0.3644	0.3431	0.3231	0.3043	0.2865	0.2698	0.2541
	PC X:0	PC X:1	PC X:2	PC X:3	PC X:4	PC X:5	PC X:6	PC X:7	PC X:8
B0	0.3231	0.3047	0.2874	0.3001	0.283	0.267	0.2519	0.2376	0.2241
B1	-0.5018	-0.4733	-0.4464	-0.4905	-0.4626	-0.4364	-0.4118	-0.3883	-0.3662
B2	0.721	0.6801	0.6415	0.6461	0.6094	0.5749	0.5424	0.5115	0.4825
	PE X:0	PE X:1	PE X:2	PE X:3	PE X:4	PE X:5	PE X:6	PE X:7	PE X:8
B0	0.3489	0.3288	0.3098	0.316	0.2977	0.2804	0.2642	0.2489	0.2345
B1	-0.5727	-0.5397	-0.5085	-0.537	-0.5058	-0.4765	-0.449	-0.4229	-0.3985
B2	0.7782	0.7333	0.6908	0.6851	0.6453	0.608	0.5728	0.5396	0.5084
	PG X:0	PG X:1	PG X:2	PG X:3	PG X:4	PG X:5	PG X:6	PG X:7	PG X:8
B0	0.1797	0.1719	0.1644	0.1742	0.1666	0.1593	0.1524	0.1458	0.1394
B1	-0.06801	-0.06505	-0.06226	-0.1004	-0.09607	-0.09182	-0.08788	-0.08409	-0.08035
B2	0.3131	0.2994	0.2864	0.298	0.285	0.2725	0.2607	0.2493	0.2384
	PS X:0	PS X:1	PS X:2	PS X:3	PS X:4	PS X:5	PS X:6	PS X:7	PS X:8
B0	0.1797	0.1719	0.1644	0.1742	0.1666	0.1593	0.1524	0.1458	0.1394
B1	-0.06801	-0.06505	-0.06226	-0.1004	-0.09607	-0.09182	-0.08788	-0.08409	-0.08035
B2	0.3131	0.2994	0.2864	0.298	0.285	0.2725	0.2607	0.2493	0.2384
	PI X:0	PI X:1	PI X:2	PI X:3	PI X:4	PI X:5	PI X:6	PI X:7	PI X:8
B0	0.1442	0.138	0.132	0.1479	0.1415	0.1354	0.1295	0.1239	0.1186
B1	0.01457	0.01395	0.01339	-0.03891	-0.03726	-0.0357	-0.0341	-0.03261	-0.03119
B2	0.2607	0.2494	0.2387	0.2589	0.2477	0.2371	0.2268	0.217	0.2076

## Sheet: Table.S3
Table.S3 Regressive curve of different subclass of lysophopholipids(y=B0+B1x+B2x2).
	LPC X:0	LPC X:1	LPC X:2	LPC X:3	LPC X:4	LPC X:5	LPC X:6
B0	-0.8713	-0.8219	-0.7753	-0.7314	-0.6898	-0.6508	-0.6139
B1	4.09	3.858	3.639	3.433	3.238	3.055	2.881
B2	-3.67	-3.462	-3.266	-3.081	-2.906	-2.742	-2.586
	LPE X:0	LPE X:1	LPE X:2	LPE X:3	LPE X:4	LPE X:5	LPE X:6
B0	-0.8548	-0.8054	-0.7588	-0.7148	-0.6734	-0.6344	-0.5977
B1	4.049	3.815	3.594	3.386	3.19	3.005	2.831
B2	-3.643	-3.432	-3.234	-3.046	-2.87	-2.704	-2.547
	LPG X:0	LPG X:1	LPG X:2	LPG X:3	LPG X:4	LPG X:5	LPG X:6
B0	-0.2726	-0.2607	-0.2493	-0.2385	-0.228	-0.218	-0.2085
B1	0.8701	0.8319	0.7954	0.761	0.7274	0.6957	0.6655
B2	0.3264	0.3123	0.2989	0.2854	0.2734	0.2614	0.2498
	LPS X:0	LPS X:1	LPS X:2	LPS X:3	LPS X:4	LPS X:5	LPS X:6
B0	-0.01405	-0.01342	-0.01285	-0.01231	-0.01177	-0.01125	-0.01075
B1	-0.4733	-0.4527	-0.4328	-0.4138	-0.3958	-0.3785	-0.362
B2	2.04	1.951	1.865	1.784	1.706	1.631	1.56
	LPI X:0	LPI X:1	LPI X:2	LPI X:3	LPI X:4	LPI X:5	LPI X:6
B0	0.06576	0.06294	0.06023	0.05757	0.05508	0.0527	0.05042
B1	-0.8806	-0.8427	-0.8063	-0.7712	-0.7379	-0.706	-0.6755
B2	2.529	2.42	2.316	2.215	2.12	2.028	1.941

## Sheet: Table.S4
Table.S4 MRM transition of lipids and deuterated internal standards.
Q1(Da)	Q3(Da)	ID	IS	DP(eV)	EP(eV)	CE(eV)	CXP(eV)
591.403	227.202	PA(14:0_14:0)	17:0-14:1 PC-d5+AcO.IS	-80	-10	-50	-15
645.45	281.249	PA(14:0_18:1)	17:0-14:1 PC-d5+AcO.IS	-80	-10	-50	-15
643.434	279.233	PA(14:0_18:2)	17:0-16:1 PC-d5+AcO.IS	-80	-10	-50	-15
641.419	277.217	PA(14:0_18:3)	17:0-20:3 PC-d5+AcO.IS	-80	-10	-50	-15
673.481	309.28	PA(14:0_20:1)	17:0-18:1 PC-d5+AcO.IS	-80	-10	-50	-15
671.466	307.264	PA(14:0_20:2)	17:0-18:1 PC-d5+AcO.IS	-80	-10	-50	-15
669.45	305.249	PA(14:0_20:3)	17:0-20:3 PC-d5+AcO.IS	-80	-10	-50	-15
667.434	303.233	PA(14:0_20:4)	17:0-20:3 PC-d5+AcO.IS	-80	-10	-50	-15
665.419	301.217	PA(14:0_20:5)	17:0-22:4 PC-d5+AcO.IS	-80	-10	-50	-15
695.466	331.264	PA(14:0_22:4)	17:0-22:4 PC-d5+AcO.IS	-80	-10	-50	-15
693.45	329.249	PA(14:0_22:5)	17:0-22:4 PC-d5+AcO.IS	-80	-10	-50	-15
691.434	327.233	PA(14:0_22:6)	17:0-22:4 PC-d5+AcO.IS	-80	-10	-50	-15
619.434	227.202	PA(16:0_14:0)	17:0-14:1 PC-d5+AcO.IS	-80	-10	-50	-15
647.466	255.233	PA(16:0_16:0)	17:0-14:1 PC-d5+AcO.IS	-80	-10	-50	-15
645.45	253.217	PA(16:0_16:1)	17:0-14:1 PC-d5+AcO.IS	-80	-10	-50	-15
675.497	283.264	PA(16:0_18:0)	17:0-16:1 PC-d5+AcO.IS	-80	-10	-50	-15
673.481	281.249	PA(16:0_18:1)	17:0-18:1 PC-d5+AcO.IS	-80	-10	-50	-15
671.466	279.233	PA(16:0_18:2)	17:0-18:1 PC-d5+AcO.IS	-80	-10	-50	-15
669.45	277.217	PA(16:0_18:3)	17:0-16:1 PC-d5+AcO.IS	-80	-10	-50	-15
701.513	309.28	PA(16:0_20:1)	17:0-18:1 PC-d5+AcO.IS	-80	-10	-50	-15
699.497	307.264	PA(16:0_20:2)	17:0-18:1 PC-d5+AcO.IS	-80	-10	-50	-15
697.481	305.249	PA(16:0_20:3)	17:0-20:3 PC-d5+AcO.IS	-80	-10	-50	-15
695.466	303.233	PA(16:0_20:4)	17:0-22:4 PC-d5+AcO.IS	-80	-10	-50	-15
693.45	301.217	PA(16:0_20:5)	17:0-22:4 PC-d5+AcO.IS	-80	-10	-50	-15
723.497	331.264	PA(16:0_22:4)	17:0-20:3 PC-d5+AcO.IS	-80	-10	-50	-15
721.481	329.249	PA(16:0_22:5)	17:0-22:4 PC-d5+AcO.IS	-80	-10	-50	-15
719.466	327.233	PA(16:0_22:6)	17:0-22:4 PC-d5+AcO.IS	-80	-10	-50	-15
647.466	227.202	PA(18:0_14:0)	17:0-16:1 PC-d5+AcO.IS	-80	-10	-50	-15
673.481	253.217	PA(18:0_16:1)	17:0-16:1 PC-d5+AcO.IS	-80	-10	-50	-15
703.528	283.264	PA(18:0_18:0)	17:0-18:1 PC-d5+AcO.IS	-80	-10	-50	-15
701.513	281.249	PA(18:0_18:1)	17:0-18:1 PC-d5+AcO.IS	-80	-10	-50	-15
699.497	279.233	PA(18:0_18:2)	17:0-18:1 PC-d5+AcO.IS	-80	-10	-50	-15
697.481	277.217	PA(18:0_18:3)	17:0-20:3 PC-d5+AcO.IS	-80	-10	-50	-15
731.56	283.264	PA(18:0_20:0)	17:0-18:1 PC-d5+AcO.IS	-80	-10	-50	-15
729.544	309.28	PA(18:0_20:1)	17:0-18:1 PC-d5+AcO.IS	-80	-10	-50	-15
727.528	307.264	PA(18:0_20:2)	17:0-20:3 PC-d5+AcO.IS	-80	-10	-50	-15
725.513	305.249	PA(18:0_20:3)	17:0-20:3 PC-d5+AcO.IS	-80	-10	-50	-15
723.497	303.233	PA(18:0_20:4)	17:0-20:3 PC-d5+AcO.IS	-80	-10	-50	-15
721.481	301.217	PA(18:0_20:5)	17:0-22:4 PC-d5+AcO.IS	-80	-10	-50	-15
751.528	331.264	PA(18:0_22:4)	17:0-22:4 PC-d5+AcO.IS	-80	-10	-50	-15
749.513	329.249	PA(18:0_22:5)	17:0-22:4 PC-d5+AcO.IS	-80	-10	-50	-15
747.497	327.233	PA(18:0_22:6)	17:0-22:4 PC-d5+AcO.IS	-80	-10	-50	-15
671.466	281.249	PA(18:1_16:1)	17:0-18:1 PC-d5+AcO.IS	-80	-10	-50	-15
699.497	281.249	PA(18:1_18:1)	17:0-18:1 PC-d5+AcO.IS	-80	-10	-50	-15
697.481	279.233	PA(18:1_18:2)	17:0-18:1 PC-d5+AcO.IS	-80	-10	-50	-15
695.466	277.217	PA(18:1_18:3)	17:0-20:3 PC-d5+AcO.IS	-80	-10	-50	-15
727.528	309.28	PA(18:1_20:1)	17:0-20:3 PC-d5+AcO.IS	-80	-10	-50	-15
725.513	307.264	PA(18:1_20:2)	17:0-20:3 PC-d5+AcO.IS	-80	-10	-50	-15
723.497	305.249	PA(18:1_20:3)	17:0-20:3 PC-d5+AcO.IS	-80	-10	-50	-15
721.481	303.233	PA(18:1_20:4)	17:0-20:3 PC-d5+AcO.IS	-80	-10	-50	-15
719.466	301.217	PA(18:1_20:5)	17:0-20:3 PC-d5+AcO.IS	-80	-10	-50	-15
749.513	331.264	PA(18:1_22:4)	17:0-22:4 PC-d5+AcO.IS	-80	-10	-50	-15
747.497	329.249	PA(18:1_22:5)	17:0-22:4 PC-d5+AcO.IS	-80	-10	-50	-15
745.481	327.233	PA(18:1_22:6)	17:0-22:4 PC-d5+AcO.IS	-80	-10	-50	-15
669.45	279.233	PA(18:2_16:1)	17:0-20:3 PC-d5+AcO.IS	-80	-10	-50	-15
695.466	279.233	PA(18:2_18:2)	17:0-22:4 PC-d5+AcO.IS	-80	-10	-50	-15
693.45	277.217	PA(18:2_18:3)	17:0-22:4 PC-d5+AcO.IS	-80	-10	-50	-15
725.513	309.28	PA(18:2_20:1)	17:0-20:3 PC-d5+AcO.IS	-80	-10	-50	-15
723.497	307.264	PA(18:2_20:2)	17:0-20:3 PC-d5+AcO.IS	-80	-10	-50	-15
721.481	305.249	PA(18:2_20:3)	17:0-20:3 PC-d5+AcO.IS	-80	-10	-50	-15
719.466	303.233	PA(18:2_20:4)	17:0-20:3 PC-d5+AcO.IS	-80	-10	-50	-15
717.45	301.217	PA(18:2_20:5)	17:0-22:4 PC-d5+AcO.IS	-80	-10	-50	-15
747.497	331.264	PA(18:2_22:4)	17:0-22:4 PC-d5+AcO.IS	-80	-10	-50	-15
745.481	329.249	PA(18:2_22:5)	17:0-22:4 PC-d5+AcO.IS	-80	-10	-50	-15
743.466	327.233	PA(18:2_22:6)	17:0-22:4 PC-d5+AcO.IS	-80	-10	-50	-15
701.513	253.217	PA(20:0_16:1)	17:0-18:1 PC-d5+AcO.IS	-80	-10	-50	-15
729.544	281.249	PA(20:0_18:1)	17:0-18:1 PC-d5+AcO.IS	-80	-10	-50	-15
727.528	279.233	PA(20:0_18:2)	17:0-20:3 PC-d5+AcO.IS	-80	-10	-50	-15
725.513	277.217	PA(20:0_18:3)	17:0-20:3 PC-d5+AcO.IS	-80	-10	-50	-15
757.575	309.28	PA(20:0_20:1)	17:0-22:4 PC-d5+AcO.IS	-80	-10	-50	-15
755.56	307.264	PA(20:0_20:2)	17:0-22:4 PC-d5+AcO.IS	-80	-10	-50	-15
753.544	305.249	PA(20:0_20:3)	17:0-20:3 PC-d5+AcO.IS	-80	-10	-50	-15
751.528	303.233	PA(20:0_20:4)	17:0-22:4 PC-d5+AcO.IS	-80	-10	-50	-15
749.513	301.217	PA(20:0_20:5)	17:0-22:4 PC-d5+AcO.IS	-80	-10	-50	-15
779.56	331.264	PA(20:0_22:4)	17:0-22:4 PC-d5+AcO.IS	-80	-10	-50	-15
777.544	329.249	PA(20:0_22:5)	17:0-22:4 PC-d5+AcO.IS	-80	-10	-50	-15
775.528	327.233	PA(20:0_22:6)	17:0-22:4 PC-d5+AcO.IS	-80	-10	-50	-15
736.513	227.202	PC(14:0_14:0)+AcO	17:0-14:1 PC-d5+AcO.IS	-80	-10	-50	-15
790.56	281.249	PC(14:0_18:1)+AcO	17:0-14:1 PC-d5+AcO.IS	-80	-10	-50	-15
788.545	279.233	PC(14:0_18:2)+AcO	17:0-14:1 PC-d5+AcO.IS	-80	-10	-50	-15
786.529	277.217	PC(14:0_18:3)+AcO	17:0-14:1 PC-d5+AcO.IS	-80	-10	-50	-15
818.592	309.28	PC(14:0_20:1)+AcO	17:0-16:1 PC-d5+AcO.IS	-80	-10	-50	-15
816.576	307.264	PC(14:0_20:2)+AcO	17:0-16:1 PC-d5+AcO.IS	-80	-10	-50	-15
814.56	305.249	PC(14:0_20:3)+AcO	17:0-20:3 PC-d5+AcO.IS	-80	-10	-50	-15
812.545	303.233	PC(14:0_20:4)+AcO	17:0-22:4 PC-d5+AcO.IS	-80	-10	-50	-15
810.529	301.217	PC(14:0_20:5)+AcO	17:0-22:4 PC-d5+AcO.IS	-80	-10	-50	-15
840.576	331.264	PC(14:0_22:4)+AcO	17:0-22:4 PC-d5+AcO.IS	-80	-10	-50	-15
838.56	329.249	PC(14:0_22:5)+AcO	17:0-22:4 PC-d5+AcO.IS	-80	-10	-50	-15
836.545	327.233	PC(14:0_22:6)+AcO	17:0-22:4 PC-d5+AcO.IS	-80	-10	-50	-15
764.545	227.202	PC(16:0_14:0)+AcO	17:0-14:1 PC-d5+AcO.IS	-80	-10	-50	-15
792.576	255.233	PC(16:0_16:0)+AcO	17:0-14:1 PC-d5+AcO.IS	-80	-10	-50	-15
790.56	253.217	PC(16:0_16:1)+AcO	17:0-16:1 PC-d5+AcO.IS	-80	-10	-50	-15
820.607	283.264	PC(16:0_18:0)+AcO	17:0-18:1 PC-d5+AcO.IS	-80	-10	-50	-15
818.592	281.249	PC(16:0_18:1)+AcO	17:0-16:1 PC-d5+AcO.IS	-80	-10	-50	-15
816.576	279.233	PC(16:0_18:2)+AcO	17:0-18:1 PC-d5+AcO.IS	-80	-10	-50	-15
814.56	277.217	PC(16:0_18:3)+AcO	17:0-20:3 PC-d5+AcO.IS	-80	-10	-50	-15
846.623	309.28	PC(16:0_20:1)+AcO	17:0-18:1 PC-d5+AcO.IS	-80	-10	-50	-15
844.607	307.264	PC(16:0_20:2)+AcO	17:0-20:3 PC-d5+AcO.IS	-80	-10	-50	-15
842.592	305.249	PC(16:0_20:3)+AcO	17:0-20:3 PC-d5+AcO.IS	-80	-10	-50	-15
840.576	303.233	PC(16:0_20:4)+AcO	17:0-22:4 PC-d5+AcO.IS	-80	-10	-50	-15
838.56	301.217	PC(16:0_20:5)+AcO	17:0-22:4 PC-d5+AcO.IS	-80	-10	-50	-15
868.607	331.264	PC(16:0_22:4)+AcO	17:0-22:4 PC-d5+AcO.IS	-80	-10	-50	-15
866.592	329.249	PC(16:0_22:5)+AcO	17:0-22:4 PC-d5+AcO.IS	-80	-10	-50	-15
864.576	327.233	PC(16:0_22:6)+AcO	17:0-22:4 PC-d5+AcO.IS	-80	-10	-50	-15
816.576	281.249	PC(16:1_18:1)+AcO	17:0-18:1 PC-d5+AcO.IS	-80	-10	-50	-15
814.56	253.217	PC(16:1_18:2)+AcO	17:0-18:1 PC-d5+AcO.IS	-80	-10	-50	-15
792.576	227.202	PC(18:0_14:0)+AcO	17:0-16:1 PC-d5+AcO.IS	-80	-10	-50	-15
818.592	253.217	PC(18:0_16:1)+AcO	17:0-18:1 PC-d5+AcO.IS	-80	-10	-50	-15
848.639	283.264	PC(18:0_18:0)+AcO	17:0-18:1 PC-d5+AcO.IS	-80	-10	-50	-15
846.623	281.249	PC(18:0_18:1)+AcO	17:0-18:1 PC-d5+AcO.IS	-80	-10	-50	-15
844.607	279.233	PC(18:0_18:2)+AcO	17:0-20:3 PC-d5+AcO.IS	-80	-10	-50	-15
842.592	277.217	PC(18:0_18:3)+AcO	17:0-20:3 PC-d5+AcO.IS	-80	-10	-50	-15
876.67	283.264	PC(18:0_20:0)+AcO	17:0-14:1 PC-d5+AcO.IS	-80	-10	-50	-15
874.654	309.28	PC(18:0_20:1)+AcO	17:0-18:1 PC-d5+AcO.IS	-80	-10	-50	-15
872.639	307.264	PC(18:0_20:2)+AcO	17:0-18:1 PC-d5+AcO.IS	-80	-10	-50	-15
870.623	305.249	PC(18:0_20:3)+AcO	17:0-20:3 PC-d5+AcO.IS	-80	-10	-50	-15
868.607	303.233	PC(18:0_20:4)+AcO	17:0-22:4 PC-d5+AcO.IS	-80	-10	-50	-15
866.592	301.217	PC(18:0_20:5)+AcO	17:0-22:4 PC-d5+AcO.IS	-80	-10	-50	-15
896.639	331.264	PC(18:0_22:4)+AcO	17:0-22:4 PC-d5+AcO.IS	-80	-10	-50	-15
894.623	329.249	PC(18:0_22:5)+AcO	17:0-22:4 PC-d5+AcO.IS	-80	-10	-50	-15
892.607	327.233	PC(18:0_22:6)+AcO	17:0-22:4 PC-d5+AcO.IS	-80	-10	-50	-15
816.576	253.217	PC(18:1_16:1)+AcO	17:0-16:1 PC-d5+AcO.IS	-80	-10	-50	-15
844.607	281.249	PC(18:1_18:1)+AcO	17:0-18:1 PC-d5+AcO.IS	-80	-10	-50	-15
842.592	279.233	PC(18:1_18:2)+AcO	17:0-20:3 PC-d5+AcO.IS	-80	-10	-50	-15
840.576	277.217	PC(18:1_18:3)+AcO	17:0-22:4 PC-d5+AcO.IS	-80	-10	-50	-15
872.639	309.28	PC(18:1_20:1)+AcO	17:0-18:1 PC-d5+AcO.IS	-80	-10	-50	-15
870.623	307.264	PC(18:1_20:2)+AcO	17:0-20:3 PC-d5+AcO.IS	-80	-10	-50	-15
868.607	305.249	PC(18:1_20:3)+AcO	17:0-22:4 PC-d5+AcO.IS	-80	-10	-50	-15
866.592	303.233	PC(18:1_20:4)+AcO	17:0-22:4 PC-d5+AcO.IS	-80	-10	-50	-15
864.576	301.217	PC(18:1_20:5)+AcO	17:0-22:4 PC-d5+AcO.IS	-80	-10	-50	-15
894.623	331.264	PC(18:1_22:4)+AcO	17:0-22:4 PC-d5+AcO.IS	-80	-10	-50	-15
892.607	329.249	PC(18:1_22:5)+AcO	17:0-22:4 PC-d5+AcO.IS	-80	-10	-50	-15
890.592	327.233	PC(18:1_22:6)+AcO	17:0-22:4 PC-d5+AcO.IS	-80	-10	-50	-15
814.56	279.233	PC(18:2_16:1)+AcO	17:0-20:3 PC-d5+AcO.IS	-80	-10	-50	-15
840.576	279.233	PC(18:2_18:2)+AcO	17:0-22:4 PC-d5+AcO.IS	-80	-10	-50	-15
838.56	277.217	PC(18:2_18:3)+AcO	17:0-22:4 PC-d5+AcO.IS	-80	-10	-50	-15
870.623	309.28	PC(18:2_20:1)+AcO	17:0-20:3 PC-d5+AcO.IS	-80	-10	-50	-15
868.607	307.264	PC(18:2_20:2)+AcO	17:0-22:4 PC-d5+AcO.IS	-80	-10	-50	-15
866.592	305.249	PC(18:2_20:3)+AcO	17:0-22:4 PC-d5+AcO.IS	-80	-10	-50	-15
864.576	303.233	PC(18:2_20:4)+AcO	17:0-22:4 PC-d5+AcO.IS	-80	-10	-50	-15
862.56	301.217	PC(18:2_20:5)+AcO	17:0-22:4 PC-d5+AcO.IS	-80	-10	-50	-15
892.607	331.264	PC(18:2_22:4)+AcO	17:0-22:4 PC-d5+AcO.IS	-80	-10	-50	-15
890.592	329.249	PC(18:2_22:5)+AcO	17:0-22:4 PC-d5+AcO.IS	-80	-10	-50	-15
888.576	327.233	PC(18:2_22:6)+AcO	17:0-22:4 PC-d5+AcO.IS	-80	-10	-50	-15
846.623	253.217	PC(20:0_16:1)+AcO	17:0-18:1 PC-d5+AcO.IS	-80	-10	-50	-15
874.654	281.249	PC(20:0_18:1)+AcO	17:0-18:1 PC-d5+AcO.IS	-80	-10	-50	-15
870.623	277.217	PC(20:0_18:3)+AcO	17:0-20:3 PC-d5+AcO.IS	-80	-10	-50	-15
902.685	309.28	PC(20:0_20:1)+AcO	17:0-18:1 PC-d5+AcO.IS	-80	-10	-50	-15
900.67	307.264	PC(20:0_20:2)+AcO	17:0-20:3 PC-d5+AcO.IS	-80	-10	-50	-15
898.654	305.249	PC(20:0_20:3)+AcO	17:0-20:3 PC-d5+AcO.IS	-80	-10	-50	-15
896.639	303.233	PC(20:0_20:4)+AcO	17:0-22:4 PC-d5+AcO.IS	-80	-10	-50	-15
894.623	301.217	PC(20:0_20:5)+AcO	17:0-22:4 PC-d5+AcO.IS	-80	-10	-50	-15
924.67	331.264	PC(20:0_22:4)+AcO	17:0-22:4 PC-d5+AcO.IS	-80	-10	-50	-15
922.654	329.249	PC(20:0_22:5)+AcO	17:0-22:4 PC-d5+AcO.IS	-80	-10	-50	-15
920.639	327.233	PC(20:0_22:6)+AcO	17:0-22:4 PC-d5+AcO.IS	-80	-10	-50	-15
634.445	227.202	PE(14:0_14:0)-H	17:0-14:1 PE-d5.IS	-80	-10	-50	-15
660.461	253.217	PE(14:0_16:1)	17:0-14:1 PE-d5.IS	-80	-10	-50	-15
688.492	281.249	PE(14:0_18:1)	17:0-14:1 PE-d5.IS	-80	-10	-50	-15
686.477	279.233	PE(14:0_18:2)	17:0-16:1 PE-d5.IS	-80	-10	-50	-15
684.461	277.217	PE(14:0_18:3)	17:0-16:1 PE-d5.IS	-80	-10	-50	-15
716.524	309.28	PE(14:0_20:1)	17:0-18:1 PE-d5.IS	-80	-10	-50	-15
714.508	307.264	PE(14:0_20:2)	17:0-18:1 PE-d5.IS	-80	-10	-50	-15
712.492	305.249	PE(14:0_20:3)	17:0-20:3 PE-d5.IS	-80	-10	-50	-15
710.477	303.233	PE(14:0_20:4)	17:0-22:4 PE-d5.IS	-80	-10	-50	-15
708.461	301.217	PE(14:0_20:5)	17:0-22:4 PE-d5.IS	-80	-10	-50	-15
738.508	331.264	PE(14:0_22:4)	17:0-22:4 PE-d5.IS	-80	-10	-50	-15
736.492	329.249	PE(14:0_22:5)	17:0-22:4 PE-d5.IS	-80	-10	-50	-15
734.477	327.233	PE(14:0_22:6)	17:0-22:4 PE-d5.IS	-80	-10	-50	-15
662.477	255.233	PE(16:0_14:0)	17:0-14:1 PE-d5.IS	-80	-10	-50	-15
690.508	255.233	PE(16:0_16:0)	17:0-14:1 PE-d5.IS	-80	-10	-50	-15
688.492	253.217	PE(16:0_16:1)	17:0-14:1 PE-d5.IS	-80	-10	-50	-15
716.524	281.249	PE(16:0_18:1)	17:0-18:1 PE-d5.IS	-80	-10	-50	-15
714.508	279.233	PE(16:0_18:2)	17:0-18:1 PE-d5.IS	-80	-10	-50	-15
712.492	277.217	PE(16:0_18:3)	17:0-20:3 PE-d5.IS	-80	-10	-50	-15
744.555	309.28	PE(16:0_20:1)	17:0-18:1 PE-d5.IS	-80	-10	-50	-15
742.539	307.264	PE(16:0_20:2)	17:0-18:1 PE-d5.IS	-80	-10	-50	-15
740.524	305.249	PE(16:0_20:3)	17:0-20:3 PE-d5.IS	-80	-10	-50	-15
738.508	303.233	PE(16:0_20:4)	17:0-22:4 PE-d5.IS	-80	-10	-50	-15
736.492	301.217	PE(16:0_20:5)	17:0-22:4 PE-d5.IS	-80	-10	-50	-15
766.539	331.264	PE(16:0_22:4)	17:0-22:4 PE-d5.IS	-80	-10	-50	-15
764.524	329.249	PE(16:0_22:5)	17:0-22:4 PE-d5.IS	-80	-10	-50	-15
762.508	327.233	PE(16:0_22:6)	17:0-22:4 PE-d5.IS	-80	-10	-50	-15
690.508	283.264	PE(18:0_14:0)	17:0-14:1 PE-d5.IS	-80	-10	-50	-15
718.539	283.264	PE(18:0_16:0)	17:0-18:1 PE-d5.IS	-80	-10	-50	-15
716.524	283.264	PE(18:0_16:1)	17:0-18:1 PE-d5.IS	-80	-10	-50	-15
746.57	283.264	PE(18:0_18:0)	17:0-18:1 PE-d5.IS	-80	-10	-50	-15
744.555	281.249	PE(18:0_18:1)	17:0-18:1 PE-d5.IS	-80	-10	-50	-15
742.539	279.233	PE(18:0_18:2)	17:0-18:1 PE-d5.IS	-80	-10	-50	-15
740.524	277.217	PE(18:0_18:3)	17:0-20:3 PE-d5.IS	-80	-10	-50	-15
772.586	309.28	PE(18:0_20:1)	17:0-18:1 PE-d5.IS	-80	-10	-50	-15
770.57	307.264	PE(18:0_20:2)	17:0-18:1 PE-d5.IS	-80	-10	-50	-15
768.555	305.249	PE(18:0_20:3)	17:0-20:3 PE-d5.IS	-80	-10	-50	-15
766.539	303.233	PE(18:0_20:4)	17:0-22:4 PE-d5.IS	-80	-10	-50	-15
764.524	301.217	PE(18:0_20:5)	17:0-22:4 PE-d5.IS	-80	-10	-50	-15
794.57	331.264	PE(18:0_22:4)	17:0-22:4 PE-d5.IS	-80	-10	-50	-15
792.555	329.249	PE(18:0_22:5)	17:0-22:4 PE-d5.IS	-80	-10	-50	-15
790.539	327.233	PE(18:0_22:6)	17:0-22:4 PE-d5.IS	-80	-10	-50	-15
714.508	281.249	PE(18:1_16:1)	17:0-18:1 PE-d5.IS	-80	-10	-50	-15
742.539	281.249	PE(18:1_18:1)	17:0-18:1 PE-d5.IS	-80	-10	-50	-15
740.524	279.233	PE(18:1_18:2)	17:0-20:3 PE-d5.IS	-80	-10	-50	-15
738.508	277.217	PE(18:1_18:3)	17:0-20:3 PE-d5.IS	-80	-10	-50	-15
770.57	309.28	PE(18:1_20:1)	17:0-20:3 PE-d5.IS	-80	-10	-50	-15
768.555	307.264	PE(18:1_20:2)	17:0-20:3 PE-d5.IS	-80	-10	-50	-15
766.539	305.249	PE(18:1_20:3)	17:0-20:3 PE-d5.IS	-80	-10	-50	-15
764.524	303.233	PE(18:1_20:4)	17:0-22:4 PE-d5.IS	-80	-10	-50	-15
762.508	301.217	PE(18:1_20:5)	17:0-22:4 PE-d5.IS	-80	-10	-50	-15
792.555	331.264	PE(18:1_22:4)	17:0-22:4 PE-d5.IS	-80	-10	-50	-15
790.539	329.249	PE(18:1_22:5)	17:0-22:4 PE-d5.IS	-80	-10	-50	-15
788.524	327.233	PE(18:1_22:6)	17:0-22:4 PE-d5.IS	-80	-10	-50	-15
712.492	279.233	PE(18:2_16:1)	17:0-20:3 PE-d5.IS	-80	-10	-50	-15
738.508	279.233	PE(18:2_18:2)	17:0-22:4 PE-d5.IS	-80	-10	-50	-15
736.492	277.217	PE(18:2_18:3)	17:0-22:4 PE-d5.IS	-80	-10	-50	-15
768.555	309.28	PE(18:2_20:1)	17:0-20:3 PE-d5.IS	-80	-10	-50	-15
766.539	307.264	PE(18:2_20:2)	17:0-22:4 PE-d5.IS	-80	-10	-50	-15
764.524	305.249	PE(18:2_20:3)	17:0-22:4 PE-d5.IS	-80	-10	-50	-15
762.508	303.233	PE(18:2_20:4)	17:0-22:4 PE-d5.IS	-80	-10	-50	-15
760.492	301.217	PE(18:2_20:5)	17:0-22:4 PE-d5.IS	-80	-10	-50	-15
790.539	331.264	PE(18:2_22:4)	17:0-22:4 PE-d5.IS	-80	-10	-50	-15
788.524	329.249	PE(18:2_22:5)	17:0-22:4 PE-d5.IS	-80	-10	-50	-15
786.508	327.233	PE(18:2_22:6)	17:0-22:4 PE-d5.IS	-80	-10	-50	-15
676.529	255.233	PE(O-16:0_16:0)	17:0-16:1 PE-d5.IS	-80	-10	-50	-15
674.513	253.217	PE(O-16:0_16:1)	17:0-16:1 PE-d5.IS	-80	-10	-50	-15
704.56	283.264	PE(O-16:0_18:0)	17:0-18:1 PE-d5.IS	-80	-10	-50	-15
702.544	281.249	PE(O-16:0_18:1)	17:0-18:1 PE-d5.IS	-80	-10	-50	-15
700.529	279.233	PE(O-16:0_18:2)	17:0-18:1 PE-d5.IS	-80	-10	-50	-15
698.513	277.217	PE(O-16:0_18:3)	17:0-20:3 PE-d5.IS	-80	-10	-50	-15
730.576	309.28	PE(O-16:0_20:1)	17:0-18:1 PE-d5.IS	-80	-10	-50	-15
728.56	307.264	PE(O-16:0_20:2)	17:0-18:1 PE-d5.IS	-80	-10	-50	-15
726.544	305.249	PE(O-16:0_20:3)	17:0-20:3 PE-d5.IS	-80	-10	-50	-15
724.529	303.233	PE(O-16:0_20:4)	17:0-22:4 PE-d5.IS	-80	-10	-50	-15
722.513	301.217	PE(O-16:0_20:5)	17:0-22:4 PE-d5.IS	-80	-10	-50	-15
752.56	331.264	PE(O-16:0_22:4)	17:0-22:4 PE-d5.IS	-80	-10	-50	-15
750.544	329.249	PE(O-16:0_22:5)	17:0-22:4 PE-d5.IS	-80	-10	-50	-15
748.529	327.233	PE(O-16:0_22:6)	17:0-22:4 PE-d5.IS	-80	-10	-50	-15
704.56	255.233	PE(O-18:0_16:0)	17:0-18:1 PE-d5.IS	-80	-10	-50	-15
702.544	253.217	PE(O-18:0_16:1)	17:0-16:1 PE-d5.IS	-80	-10	-50	-15
732.591	283.264	PE(O-18:0_18:0)	17:0-18:1 PE-d5.IS	-80	-10	-50	-15
730.576	281.249	PE(O-18:0_18:1)	17:0-18:1 PE-d5.IS	-80	-10	-50	-15
728.56	279.233	PE(O-18:0_18:2)	17:0-18:1 PE-d5.IS	-80	-10	-50	-15
726.544	277.217	PE(O-18:0_18:3)	17:0-20:3 PE-d5.IS	-80	-10	-50	-15
758.607	309.28	PE(O-18:0_20:1)	17:0-18:1 PE-d5.IS	-80	-10	-50	-15
756.591	307.264	PE(O-18:0_20:2)	17:0-18:1 PE-d5.IS	-80	-10	-50	-15
754.576	305.249	PE(O-18:0_20:3)	17:0-20:3 PE-d5.IS	-80	-10	-50	-15
752.56	303.233	PE(O-18:0_20:4)	17:0-20:3 PE-d5.IS	-80	-10	-50	-15
750.544	301.217	PE(O-18:0_20:5)	17:0-22:4 PE-d5.IS	-80	-10	-50	-15
780.591	331.264	PE(O-18:0_22:4)	17:0-22:4 PE-d5.IS	-80	-10	-50	-15
778.576	329.249	PE(O-18:0_22:5)	17:0-22:4 PE-d5.IS	-80	-10	-50	-15
776.56	327.233	PE(O-18:0_22:6)	17:0-22:4 PE-d5.IS	-80	-10	-50	-15
674.5	283.264	PE(P-14:0_18:0)	17:0-14:1 PE-d5.IS	-80	-10	-50	-15
672.5	281.249	PE(P-14:0_18:1)	17:0-14:1 PE-d5.IS	-80	-10	-50	-15
674.5	255.233	PE(P-16:0_16:0)	17:0-14:1 PE-d5.IS	-80	-10	-50	-15
672.5	253.217	PE(P-16:0_16:1)	17:0-16:1 PE-d5.IS	-80	-10	-50	-15
702.5	283.264	PE(P-16:0_18:0)	17:0-16:1 PE-d5.IS	-80	-10	-50	-15
700.5	281.249	PE(P-16:0_18:1)	17:0-16:1 PE-d5.IS	-80	-10	-50	-15
698.5	279.233	PE(P-16:0_18:2)	17:0-16:1 PE-d5.IS	-80	-10	-50	-15
696.5	277.217	PE(P-16:0_18:3)	17:0-20:3 PE-d5.IS	-80	-10	-50	-15
728.6	309.28	PE(P-16:0_20:1)	17:0-18:1 PE-d5.IS	-80	-10	-50	-15
726.5	307.264	PE(P-16:0_20:2)	17:0-18:1 PE-d5.IS	-80	-10	-50	-15
724.5	305.249	PE(P-16:0_20:3)	17:0-20:3 PE-d5.IS	-80	-10	-50	-15
722.5	303.233	PE(P-16:0_20:4)	17:0-22:4 PE-d5.IS	-80	-10	-50	-15
720.5	301.217	PE(P-16:0_20:5)	17:0-22:4 PE-d5.IS	-80	-10	-50	-15
750.5	331.264	PE(P-16:0_22:4)	17:0-22:4 PE-d5.IS	-80	-10	-50	-15
748.5	329.249	PE(P-16:0_22:5)	17:0-22:4 PE-d5.IS	-80	-10	-50	-15
746.5	327.233	PE(P-16:0_22:6)	17:0-22:4 PE-d5.IS	-80	-10	-50	-15
698.5	281.249	PE(P-16:1_18:1)	17:0-18:1 PE-d5.IS	-80	-10	-50	-15
702.5	255.233	PE(P-18:0_16:0)	17:0-18:1 PE-d5.IS	-80	-10	-50	-15
700.5	253.217	PE(P-18:0_16:1)	17:0-16:1 PE-d5.IS	-80	-10	-50	-15
730.6	283.264	PE(P-18:0_18:0)	17:0-18:1 PE-d5.IS	-80	-10	-50	-15
728.6	281.249	PE(P-18:0_18:1)	17:0-18:1 PE-d5.IS	-80	-10	-50	-15
726.5	279.233	PE(P-18:0_18:2)	17:0-18:1 PE-d5.IS	-80	-10	-50	-15
724.5	277.217	PE(P-18:0_18:3)	17:0-20:3 PE-d5.IS	-80	-10	-50	-15
756.6	309.28	PE(P-18:0_20:1)	17:0-18:1 PE-d5.IS	-80	-10	-50	-15
754.6	307.264	PE(P-18:0_20:2)	17:0-18:1 PE-d5.IS	-80	-10	-50	-15
752.6	305.249	PE(P-18:0_20:3)	17:0-20:3 PE-d5.IS	-80	-10	-50	-15
750.5	303.233	PE(P-18:0_20:4)	17:0-20:3 PE-d5.IS	-80	-10	-50	-15
748.5	301.217	PE(P-18:0_20:5)	17:0-22:4 PE-d5.IS	-80	-10	-50	-15
778.6	331.264	PE(P-18:0_22:4)	17:0-22:4 PE-d5.IS	-80	-10	-50	-15
776.6	329.249	PE(P-18:0_22:5)	17:0-22:4 PE-d5.IS	-80	-10	-50	-15
774.5	327.233	PE(P-18:0_22:6)	17:0-22:4 PE-d5.IS	-80	-10	-50	-15
700.5	255.233	PE(P-18:1_16:0)	17:0-16:1 PE-d5.IS	-80	-10	-50	-15
698.5	253.217	PE(P-18:1_16:1)	17:0-16:1 PE-d5.IS	-80	-10	-50	-15
728.6	283.1	PE(P-18:1_18:0)	17:0-16:1 PE-d5.IS	-80	-10	-50	-15
726.5	281.249	PE(P-18:1_18:1)	17:0-18:1 PE-d5.IS	-80	-10	-50	-15
724.5	279.233	PE(P-18:1_18:2)	17:0-18:1 PE-d5.IS	-80	-10	-50	-15
722.5	277.217	PE(P-18:1_18:3)	17:0-20:3 PE-d5.IS	-80	-10	-50	-15
754.6	309.28	PE(P-18:1_20:1)	17:0-20:3 PE-d5.IS	-80	-10	-50	-15
752.6	307.264	PE(P-18:1_20:2)	17:0-20:3 PE-d5.IS	-80	-10	-50	-15
750.5	305.249	PE(P-18:1_20:3)	17:0-22:4 PE-d5.IS	-80	-10	-50	-15
748.5	303.233	PE(P-18:1_20:4)	17:0-20:3 PE-d5.IS	-80	-10	-50	-15
746.5	301.217	PE(P-18:1_20:5)	17:0-22:4 PE-d5.IS	-80	-10	-50	-15
776.6	331.264	PE(P-18:1_22:4)	17:0-22:4 PE-d5.IS	-80	-10	-50	-15
774.5	329.249	PE(P-18:1_22:5)	17:0-22:4 PE-d5.IS	-80	-10	-50	-15
772.5	327.233	PE(P-18:1_22:6)	17:0-22:4 PE-d5.IS	-80	-10	-50	-15
722.5	279.233	PE(P-18:2_18:2)	17:0-22:4 PE-d5.IS	-80	-10	-50	-15
746.5	303.233	PE(P-18:2_20:4)	17:0-22:4 PE-d5.IS	-80	-10	-50	-15
770.5	327.233	PE(P-18:2_22:6)	17:0-22:4 PE-d5.IS	-80	-10	-50	-15
665.44	227.202	PG(14:0_14:0)	17:0-14:1 PG-d5.IS	-80	-10	-50	-15
719.487	281.249	PG(14:0_18:1)	17:0-14:1 PG-d5.IS	-80	-10	-50	-15
717.471	279.233	PG(14:0_18:2)	17:0-14:1 PG-d5.IS	-80	-10	-50	-15
715.456	277.217	PG(14:0_18:3)	17:0-20:3 PG-d5.IS	-80	-10	-50	-15
747.518	309.28	PG(14:0_20:1)	17:0-18:1 PG-d5.IS	-80	-10	-50	-15
745.503	307.264	PG(14:0_20:2)	17:0-18:1 PG-d5.IS	-80	-10	-50	-15
743.487	305.249	PG(14:0_20:3)	17:0-20:3 PG-d5.IS	-80	-10	-50	-15
741.471	303.233	PG(14:0_20:4)	17:0-22:4 PG-d5.IS	-80	-10	-50	-15
739.456	301.217	PG(14:0_20:5)	17:0-22:4 PG-d5.IS	-80	-10	-50	-15
769.503	331.264	PG(14:0_22:4)	17:0-22:4 PG-d5.IS	-80	-10	-50	-15
767.487	329.249	PG(14:0_22:5)	17:0-22:4 PG-d5.IS	-80	-10	-50	-15
765.471	327.233	PG(14:0_22:6)	17:0-22:4 PG-d5.IS	-80	-10	-50	-15
693.471	227.202	PG(16:0_14:0)	17:0-14:1 PG-d5.IS	-80	-10	-50	-15
721.503	255.233	PG(16:0_16:0)	17:0-16:1 PG-d5.IS	-80	-10	-50	-15
719.487	253.217	PG(16:0_16:1)	17:0-16:1 PG-d5.IS	-80	-10	-50	-15
749.534	283.264	PG(16:0_18:0)	17:0-18:1 PG-d5.IS	-80	-10	-50	-15
747.518	281.249	PG(16:0_18:1)	17:0-18:1 PG-d5.IS	-80	-10	-50	-15
745.503	279.233	PG(16:0_18:2)	17:0-18:1 PG-d5.IS	-80	-10	-50	-15
743.487	277.217	PG(16:0_18:3)	17:0-20:3 PG-d5.IS	-80	-10	-50	-15
775.549	309.28	PG(16:0_20:1)	17:0-18:1 PG-d5.IS	-80	-10	-50	-15
773.534	307.264	PG(16:0_20:2)	17:0-20:3 PG-d5.IS	-80	-10	-50	-15
771.518	305.249	PG(16:0_20:3)	17:0-20:3 PG-d5.IS	-80	-10	-50	-15
769.503	303.233	PG(16:0_20:4)	17:0-22:4 PG-d5.IS	-80	-10	-50	-15
767.487	301.217	PG(16:0_20:5)	17:0-22:4 PG-d5.IS	-80	-10	-50	-15
797.534	331.264	PG(16:0_22:4)	17:0-22:4 PG-d5.IS	-80	-10	-50	-15
795.518	329.249	PG(16:0_22:5)	17:0-22:4 PG-d5.IS	-80	-10	-50	-15
793.503	327.233	PG(16:0_22:6)	17:0-22:4 PG-d5.IS	-80	-10	-50	-15
721.503	227.202	PG(18:0_14:0)	17:0-14:1 PG-d5.IS	-80	-10	-50	-15
747.518	253.217	PG(18:0_16:1)	17:0-14:1 PG-d5.IS	-80	-10	-50	-15
777.565	283.264	PG(18:0_18:0)	17:0-16:1 PG-d5.IS	-80	-10	-50	-15
775.549	281.249	PG(18:0_18:1)	17:0-16:1 PG-d5.IS	-80	-10	-50	-15
773.534	279.233	PG(18:0_18:2)	17:0-18:1 PG-d5.IS	-80	-10	-50	-15
771.518	277.217	PG(18:0_18:3)	17:0-20:3 PG-d5.IS	-80	-10	-50	-15
805.596	283.264	PG(18:0_20:0)	17:0-18:1 PG-d5.IS	-80	-10	-50	-15
803.581	309.28	PG(18:0_20:1)	17:0-18:1 PG-d5.IS	-80	-10	-50	-15
801.565	307.264	PG(18:0_20:2)	17:0-20:3 PG-d5.IS	-80	-10	-50	-15
799.549	305.249	PG(18:0_20:3)	17:0-20:3 PG-d5.IS	-80	-10	-50	-15
797.534	303.233	PG(18:0_20:4)	17:0-22:4 PG-d5.IS	-80	-10	-50	-15
795.518	301.217	PG(18:0_20:5)	17:0-22:4 PG-d5.IS	-80	-10	-50	-15
825.565	331.264	PG(18:0_22:4)	17:0-22:4 PG-d5.IS	-80	-10	-50	-15
823.549	329.249	PG(18:0_22:5)	17:0-22:4 PG-d5.IS	-80	-10	-50	-15
821.534	327.233	PG(18:0_22:6)	17:0-22:4 PG-d5.IS	-80	-10	-50	-15
745.503	281.249	PG(18:1_16:1)	17:0-16:1 PG-d5.IS	-80	-10	-50	-15
773.534	281.249	PG(18:1_18:1)	17:0-18:1 PG-d5.IS	-80	-10	-50	-15
771.518	279.233	PG(18:1_18:2)	17:0-18:1 PG-d5.IS	-80	-10	-50	-15
769.503	277.217	PG(18:1_18:3)	17:0-20:3 PG-d5.IS	-80	-10	-50	-15
801.565	309.28	PG(18:1_20:1)	17:0-18:1 PG-d5.IS	-80	-10	-50	-15
799.549	307.264	PG(18:1_20:2)	17:0-20:3 PG-d5.IS	-80	-10	-50	-15
797.534	305.249	PG(18:1_20:3)	17:0-20:3 PG-d5.IS	-80	-10	-50	-15
795.518	303.233	PG(18:1_20:4)	17:0-22:4 PG-d5.IS	-80	-10	-50	-15
793.503	301.217	PG(18:1_20:5)	17:0-22:4 PG-d5.IS	-80	-10	-50	-15
823.549	331.264	PG(18:1_22:4)	17:0-22:4 PG-d5.IS	-80	-10	-50	-15
821.534	329.249	PG(18:1_22:5)	17:0-22:4 PG-d5.IS	-80	-10	-50	-15
819.518	327.233	PG(18:1_22:6)	17:0-22:4 PG-d5.IS	-80	-10	-50	-15
743.487	279.233	PG(18:2_16:1)	17:0-20:3 PG-d5.IS	-80	-10	-50	-15
769.503	279.233	PG(18:2_18:2)	17:0-22:4 PG-d5.IS	-80	-10	-50	-15
767.487	277.217	PG(18:2_18:3)	17:0-22:4 PG-d5.IS	-80	-10	-50	-15
799.549	309.28	PG(18:2_20:1)	17:0-20:3 PG-d5.IS	-80	-10	-50	-15
797.534	307.264	PG(18:2_20:2)	17:0-22:4 PG-d5.IS	-80	-10	-50	-15
795.518	305.249	PG(18:2_20:3)	17:0-22:4 PG-d5.IS	-80	-10	-50	-15
793.503	303.233	PG(18:2_20:4)	17:0-22:4 PG-d5.IS	-80	-10	-50	-15
791.487	301.217	PG(18:2_20:5)	17:0-22:4 PG-d5.IS	-80	-10	-50	-15
821.534	331.264	PG(18:2_22:4)	17:0-22:4 PG-d5.IS	-80	-10	-50	-15
819.518	329.249	PG(18:2_22:5)	17:0-22:4 PG-d5.IS	-80	-10	-50	-15
817.503	327.233	PG(18:2_22:6)	17:0-22:4 PG-d5.IS	-80	-10	-50	-15
775.549	253.217	PG(20:0_16:1)	17:0-16:1 PG-d5.IS	-80	-10	-50	-15
803.581	281.249	PG(20:0_18:1)	17:0-18:1 PG-d5.IS	-80	-10	-50	-15
801.565	279.233	PG(20:0_18:2)	17:0-18:1 PG-d5.IS	-80	-10	-50	-15
799.549	277.217	PG(20:0_18:3)	17:0-20:3 PG-d5.IS	-80	-10	-50	-15
831.612	309.28	PG(20:0_20:1)	17:0-18:1 PG-d5.IS	-80	-10	-50	-15
829.596	307.264	PG(20:0_20:2)	17:0-18:1 PG-d5.IS	-80	-10	-50	-15
827.581	305.249	PG(20:0_20:3)	17:0-20:3 PG-d5.IS	-80	-10	-50	-15
825.565	303.233	PG(20:0_20:4)	17:0-20:3 PG-d5.IS	-80	-10	-50	-15
823.549	301.217	PG(20:0_20:5)	17:0-22:4 PG-d5.IS	-80	-10	-50	-15
853.596	331.264	PG(20:0_22:4)	17:0-22:4 PG-d5.IS	-80	-10	-50	-15
851.581	329.249	PG(20:0_22:5)	17:0-22:4 PG-d5.IS	-80	-10	-50	-15
849.565	327.233	PG(20:0_22:6)	17:0-22:4 PG-d5.IS	-80	-10	-50	-15
753.456	227.202	PI(14:0_14:0)	17:0-14:1 PI-d5.IS	-80	-10	-50	-15
807.503	281.249	PI(14:0_18:1)	17:0-16:1 PI-d5.IS	-80	-10	-50	-15
805.487	279.233	PI(14:0_18:2)	17:0-18:1 PI-d5.IS	-80	-10	-50	-15
803.472	277.217	PI(14:0_18:3)	17:0-20:3 PI-d5.IS	-80	-10	-50	-15
835.534	309.28	PI(14:0_20:1)	17:0-16:1 PI-d5.IS	-80	-10	-50	-15
833.518	307.264	PI(14:0_20:2)	17:0-18:1 PI-d5.IS	-80	-10	-50	-15
831.503	305.249	PI(14:0_20:3)	17:0-20:3 PI-d5.IS	-80	-10	-50	-15
829.487	303.233	PI(14:0_20:4)	17:0-22:4 PI-d5.IS	-80	-10	-50	-15
827.472	301.217	PI(14:0_20:5)	17:0-22:4 PI-d5.IS	-80	-10	-50	-15
857.518	331.264	PI(14:0_22:4)	17:0-22:4 PI-d5.IS	-80	-10	-50	-15
855.503	329.249	PI(14:0_22:5)	17:0-22:4 PI-d5.IS	-80	-10	-50	-15
853.487	327.233	PI(14:0_22:6)	17:0-22:4 PI-d5.IS	-80	-10	-50	-15
781.487	227.202	PI(16:0_14:0)	17:0-14:1 PI-d5.IS	-80	-10	-50	-15
809.518	255.233	PI(16:0_16:0)	17:0-14:1 PI-d5.IS	-80	-10	-50	-15
807.503	253.217	PI(16:0_16:1)	17:0-14:1 PI-d5.IS	-80	-10	-50	-15
837.55	283.264	PI(16:0_18:0)	17:0-18:1 PI-d5.IS	-80	-10	-50	-15
835.534	281.249	PI(16:0_18:1)	17:0-18:1 PI-d5.IS	-80	-10	-50	-15
833.518	279.233	PI(16:0_18:2)	17:0-18:1 PI-d5.IS	-80	-10	-50	-15
814.561	277.218	PI(16:0_18:3)	17:0-20:3 PI-d5.IS	-80	-10	-50	-15
863.565	309.28	PI(16:0_20:1)	17:0-18:1 PI-d5.IS	-80	-10	-50	-15
861.55	307.264	PI(16:0_20:2)	17:0-18:1 PI-d5.IS	-80	-10	-50	-15
859.534	305.249	PI(16:0_20:3)	17:0-20:3 PI-d5.IS	-80	-10	-50	-15
857.518	303.233	PI(16:0_20:4)	17:0-20:3 PI-d5.IS	-80	-10	-50	-15
855.503	301.217	PI(16:0_20:5)	17:0-22:4 PI-d5.IS	-80	-10	-50	-15
885.55	331.264	PI(16:0_22:4)	17:0-22:4 PI-d5.IS	-80	-10	-50	-15
883.534	329.249	PI(16:0_22:5)	17:0-22:4 PI-d5.IS	-80	-10	-50	-15
881.518	327.233	PI(16:0_22:6)	17:0-22:4 PI-d5.IS	-80	-10	-50	-15
809.518	227.202	PI(18:0_14:0)	17:0-16:1 PI-d5.IS	-80	-10	-50	-15
835.534	253.217	PI(18:0_16:1)	17:0-18:1 PI-d5.IS	-80	-10	-50	-15
865.581	283.264	PI(18:0_18:0)	17:0-18:1 PI-d5.IS	-80	-10	-50	-15
863.565	281.249	PI(18:0_18:1)	17:0-18:1 PI-d5.IS	-80	-10	-50	-15
861.55	279.233	PI(18:0_18:2)	17:0-18:1 PI-d5.IS	-80	-10	-50	-15
859.534	277.217	PI(18:0_18:3)	17:0-20:3 PI-d5.IS	-80	-10	-50	-15
893.612	283.264	PI(18:0_20:0)	17:0-18:1 PI-d5.IS	-80	-10	-50	-15
891.597	309.28	PI(18:0_20:1)	17:0-18:1 PI-d5.IS	-80	-10	-50	-15
889.581	307.264	PI(18:0_20:2)	17:0-18:1 PI-d5.IS	-80	-10	-50	-15
887.565	305.249	PI(18:0_20:3)	17:0-20:3 PI-d5.IS	-80	-10	-50	-15
885.55	303.233	PI(18:0_20:4)	17:0-22:4 PI-d5.IS	-80	-10	-50	-15
883.534	301.217	PI(18:0_20:5)	17:0-22:4 PI-d5.IS	-80	-10	-50	-15
913.581	331.264	PI(18:0_22:4)	17:0-22:4 PI-d5.IS	-80	-10	-50	-15
911.565	329.249	PI(18:0_22:5)	17:0-22:4 PI-d5.IS	-80	-10	-50	-15
909.55	327.233	PI(18:0_22:6)	17:0-22:4 PI-d5.IS	-80	-10	-50	-15
833.518	281.249	PI(18:1_16:1)	17:0-16:1 PI-d5.IS	-80	-10	-50	-15
861.55	281.249	PI(18:1_18:1)	17:0-18:1 PI-d5.IS	-80	-10	-50	-15
859.534	279.233	PI(18:1_18:2)	17:0-18:1 PI-d5.IS	-80	-10	-50	-15
857.518	277.217	PI(18:1_18:3)	17:0-20:3 PI-d5.IS	-80	-10	-50	-15
889.581	309.28	PI(18:1_20:1)	17:0-18:1 PI-d5.IS	-80	-10	-50	-15
887.565	307.264	PI(18:1_20:2)	17:0-20:3 PI-d5.IS	-80	-10	-50	-15
885.55	305.249	PI(18:1_20:3)	17:0-20:3 PI-d5.IS	-80	-10	-50	-15
883.534	303.233	PI(18:1_20:4)	17:0-22:4 PI-d5.IS	-80	-10	-50	-15
881.518	301.217	PI(18:1_20:5)	17:0-22:4 PI-d5.IS	-80	-10	-50	-15
911.565	331.264	PI(18:1_22:4)	17:0-22:4 PI-d5.IS	-80	-10	-50	-15
909.55	329.249	PI(18:1_22:5)	17:0-22:4 PI-d5.IS	-80	-10	-50	-15
907.534	327.233	PI(18:1_22:6)	17:0-22:4 PI-d5.IS	-80	-10	-50	-15
831.503	279.233	PI(18:2_16:1)	17:0-22:4 PI-d5.IS	-80	-10	-50	-15
857.518	279.233	PI(18:2_18:2)	17:0-22:4 PI-d5.IS	-80	-10	-50	-15
855.503	277.217	PI(18:2_18:3)	17:0-22:4 PI-d5.IS	-80	-10	-50	-15
887.565	309.28	PI(18:2_20:1)	17:0-20:3 PI-d5.IS	-80	-10	-50	-15
885.55	307.264	PI(18:2_20:2)	17:0-20:3 PI-d5.IS	-80	-10	-50	-15
883.534	305.249	PI(18:2_20:3)	17:0-20:3 PI-d5.IS	-80	-10	-50	-15
881.518	303.233	PI(18:2_20:4)	17:0-20:3 PI-d5.IS	-80	-10	-50	-15
879.503	301.217	PI(18:2_20:5)	17:0-22:4 PI-d5.IS	-80	-10	-50	-15
909.55	331.264	PI(18:2_22:4)	17:0-22:4 PI-d5.IS	-80	-10	-50	-15
907.534	329.249	PI(18:2_22:5)	17:0-22:4 PI-d5.IS	-80	-10	-50	-15
905.518	327.233	PI(18:2_22:6)	17:0-22:4 PI-d5.IS	-80	-10	-50	-15
863.565	253.217	PI(20:0_16:1)	17:0-18:1 PI-d5.IS	-80	-10	-50	-15
891.597	281.249	PI(20:0_18:1)	17:0-18:1 PI-d5.IS	-80	-10	-50	-15
889.581	279.233	PI(20:0_18:2)	17:0-18:1 PI-d5.IS	-80	-10	-50	-15
887.565	277.217	PI(20:0_18:3)	17:0-20:3 PI-d5.IS	-80	-10	-50	-15
919.628	309.28	PI(20:0_20:1)	17:0-18:1 PI-d5.IS	-80	-10	-50	-15
917.612	307.264	PI(20:0_20:2)	17:0-20:3 PI-d5.IS	-80	-10	-50	-15
915.597	305.249	PI(20:0_20:3)	17:0-20:3 PI-d5.IS	-80	-10	-50	-15
913.581	303.233	PI(20:0_20:4)	17:0-20:3 PI-d5.IS	-80	-10	-50	-15
911.565	301.217	PI(20:0_20:5)	17:0-22:4 PI-d5.IS	-80	-10	-50	-15
939.597	329.249	PI(20:0_22:5)	17:0-22:4 PI-d5.IS	-80	-10	-50	-15
937.581	327.233	PI(20:0_22:6)	17:0-22:4 PI-d5.IS	-80	-10	-50	-15
678.435	227.202	PS(14:0_14:0)	17:0-14:1 PS-d5.IS	-80	-10	-50	-15
732.482	281.249	PS(14:0_18:1)	17:0-16:1 PS-d5.IS	-80	-10	-50	-15
730.466	279.233	PS(14:0_18:2)	17:0-18:1 PS-d5.IS	-80	-10	-50	-15
728.451	277.217	PS(14:0_18:3)	17:0-20:3 PS-d5.IS	-80	-10	-50	-15
760.513	309.28	PS(14:0_20:1)	17:0-18:1 PS-d5.IS	-80	-10	-50	-15
758.498	307.264	PS(14:0_20:2)	17:0-18:1 PS-d5.IS	-80	-10	-50	-15
756.482	305.249	PS(14:0_20:3)	17:0-20:3 PS-d5.IS	-80	-10	-50	-15
754.466	303.233	PS(14:0_20:4)	17:0-22:4 PS-d5.IS	-80	-10	-50	-15
752.451	301.217	PS(14:0_20:5)	17:0-22:4 PS-d5.IS	-80	-10	-50	-15
782.498	331.264	PS(14:0_22:4)	17:0-22:4 PS-d5.IS	-80	-10	-50	-15
780.482	329.249	PS(14:0_22:5)	17:0-22:4 PS-d5.IS	-80	-10	-50	-15
778.466	327.233	PS(14:0_22:6)	17:0-22:4 PS-d5.IS	-80	-10	-50	-15
706.466	227.202	PS(16:0_14:0)	17:0-14:1 PS-d5.IS	-80	-10	-50	-15
734.498	255.233	PS(16:0_16:0)	17:0-14:1 PS-d5.IS	-80	-10	-50	-15
732.482	253.217	PS(16:0_16:1)	17:0-16:1 PS-d5.IS	-80	-10	-50	-15
760.513	283.264	PS(16:0_18:0)	17:0-16:1 PS-d5.IS	-80	-10	-50	-15
760.513	281.249	PS(16:0_18:1)	17:0-16:1 PS-d5.IS	-80	-10	-50	-15
758.498	279.233	PS(16:0_18:2)	17:0-18:1 PS-d5.IS	-80	-10	-50	-15
756.482	277.217	PS(16:0_18:3)	17:0-20:3 PS-d5.IS	-80	-10	-50	-15
788.545	309.28	PS(16:0_20:1)	17:0-18:1 PS-d5.IS	-80	-10	-50	-15
786.529	307.264	PS(16:0_20:2)	17:0-18:1 PS-d5.IS	-80	-10	-50	-15
784.513	305.249	PS(16:0_20:3)	17:0-20:3 PS-d5.IS	-80	-10	-50	-15
782.498	303.233	PS(16:0_20:4)	17:0-20:3 PS-d5.IS	-80	-10	-50	-15
780.482	301.217	PS(16:0_20:5)	17:0-20:3 PS-d5.IS	-80	-10	-50	-15
810.529	331.264	PS(16:0_22:4)	17:0-22:4 PS-d5.IS	-80	-10	-50	-15
808.513	329.249	PS(16:0_22:5)	17:0-22:4 PS-d5.IS	-80	-10	-50	-15
806.498	327.233	PS(16:0_22:6)	17:0-22:4 PS-d5.IS	-80	-10	-50	-15
734.498	227.202	PS(18:0_14:0)	17:0-14:1 PS-d5.IS	-80	-10	-50	-15
760.513	253.217	PS(18:0_16:1)	17:0-16:1 PS-d5.IS	-80	-10	-50	-15
790.56	283.264	PS(18:0_18:0)	17:0-18:1 PS-d5.IS	-80	-10	-50	-15
788.545	281.249	PS(18:0_18:1)	17:0-18:1 PS-d5.IS	-80	-10	-50	-15
786.529	279.233	PS(18:0_18:2)	17:0-18:1 PS-d5.IS	-80	-10	-50	-15
784.513	277.217	PS(18:0_18:3)	17:0-20:3 PS-d5.IS	-80	-10	-50	-15
818.592	283.264	PS(18:0_20:0)	17:0-20:3 PS-d5.IS	-80	-10	-50	-15
816.576	309.28	PS(18:0_20:1)	17:0-18:1 PS-d5.IS	-80	-10	-50	-15
814.56	307.264	PS(18:0_20:2)	17:0-20:3 PS-d5.IS	-80	-10	-50	-15
812.545	305.249	PS(18:0_20:3)	17:0-20:3 PS-d5.IS	-80	-10	-50	-15
810.529	303.233	PS(18:0_20:4)	17:0-20:3 PS-d5.IS	-80	-10	-50	-15
808.513	301.217	PS(18:0_20:5)	17:0-22:4 PS-d5.IS	-80	-10	-50	-15
838.56	331.264	PS(18:0_22:4)	17:0-22:4 PS-d5.IS	-80	-10	-50	-15
836.545	329.249	PS(18:0_22:5)	17:0-22:4 PS-d5.IS	-80	-10	-50	-15
834.529	327.233	PS(18:0_22:6)	17:0-22:4 PS-d5.IS	-80	-10	-50	-15
758.498	281.249	PS(18:1_16:1)	17:0-18:1 PS-d5.IS	-80	-10	-50	-15
786.529	281.249	PS(18:1_18:1)	17:0-18:1 PS-d5.IS	-80	-10	-50	-15
784.513	279.233	PS(18:1_18:2)	17:0-20:3 PS-d5.IS	-80	-10	-50	-15
782.498	277.217	PS(18:1_18:3)	17:0-20:3 PS-d5.IS	-80	-10	-50	-15
814.56	309.28	PS(18:1_20:1)	17:0-20:3 PS-d5.IS	-80	-10	-50	-15
812.545	307.264	PS(18:1_20:2)	17:0-20:3 PS-d5.IS	-80	-10	-50	-15
810.529	305.249	PS(18:1_20:3)	17:0-20:3 PS-d5.IS	-80	-10	-50	-15
808.513	303.233	PS(18:1_20:4)	17:0-22:4 PS-d5.IS	-80	-10	-50	-15
806.498	301.217	PS(18:1_20:5)	17:0-22:4 PS-d5.IS	-80	-10	-50	-15
836.545	331.264	PS(18:1_22:4)	17:0-22:4 PS-d5.IS	-80	-10	-50	-15
834.529	329.249	PS(18:1_22:5)	17:0-22:4 PS-d5.IS	-80	-10	-50	-15
832.513	327.233	PS(18:1_22:6)	17:0-22:4 PS-d5.IS	-80	-10	-50	-15
756.482	279.233	PS(18:2_16:1)	17:0-20:3 PS-d5.IS	-80	-10	-50	-15
782.498	279.233	PS(18:2_18:2)	17:0-22:4 PS-d5.IS	-80	-10	-50	-15
780.482	277.217	PS(18:2_18:3)	17:0-22:4 PS-d5.IS	-80	-10	-50	-15
812.545	309.28	PS(18:2_20:1)	17:0-20:3 PS-d5.IS	-80	-10	-50	-15
810.529	307.264	PS(18:2_20:2)	17:0-20:3 PS-d5.IS	-80	-10	-50	-15
808.513	305.249	PS(18:2_20:3)	17:0-22:4 PS-d5.IS	-80	-10	-50	-15
806.498	303.233	PS(18:2_20:4)	17:0-22:4 PS-d5.IS	-80	-10	-50	-15
804.482	301.217	PS(18:2_20:5)	17:0-22:4 PS-d5.IS	-80	-10	-50	-15
834.529	331.264	PS(18:2_22:4)	17:0-22:4 PS-d5.IS	-80	-10	-50	-15
832.513	329.249	PS(18:2_22:5)	17:0-22:4 PS-d5.IS	-80	-10	-50	-15
830.498	327.233	PS(18:2_22:6)	17:0-22:4 PS-d5.IS	-80	-10	-50	-15
788.545	253.217	PS(20:0_16:1)	17:0-18:1 PS-d5.IS	-80	-10	-50	-15
814.56	281.249	PS(20:0_18:1)	17:0-18:1 PS-d5.IS	-80	-10	-50	-15
814.561	279.234	PS(20:0_18:2)	17:0-18:1 PS-d5.IS	-80	-10	-50	-15
812.545	277.217	PS(20:0_18:3)	17:0-20:3 PS-d5.IS	-80	-10	-50	-15
844.607	309.28	PS(20:0_20:1)	17:0-20:3 PS-d5.IS	-80	-10	-50	-15
842.592	307.264	PS(20:0_20:2)	17:0-22:4 PS-d5.IS	-80	-10	-50	-15
840.576	305.249	PS(20:0_20:3)	17:0-22:4 PS-d5.IS	-80	-10	-50	-15
838.56	303.233	PS(20:0_20:4)	17:0-22:4 PS-d5.IS	-80	-10	-50	-15
836.545	301.217	PS(20:0_20:5)	17:0-22:4 PS-d5.IS	-80	-10	-50	-15
866.592	331.264	PS(20:0_22:4)	17:0-22:4 PS-d5.IS	-80	-10	-50	-15
864.576	329.249	PS(20:0_22:5)	17:0-22:4 PS-d5.IS	-80	-10	-50	-15
862.56	327.233	PS(20:0_22:6)	17:0-22:4 PS-d5.IS	-80	-10	-50	-15
645.45	227.2	PA(14:0_18:1)_1	17:0-14:1 PC-d5+AcO.IS	-80	-10	-50	-15
643.434	227.2	PA(14:0_18:2)_1	17:0-16:1 PC-d5+AcO.IS	-80	-10	-50	-15
641.419	227.2	PA(14:0_18:3)_1	17:0-20:3 PC-d5+AcO.IS	-80	-10	-50	-15
673.481	227.2	PA(14:0_20:1)_1	17:0-18:1 PC-d5+AcO.IS	-80	-10	-50	-15
671.466	227.2	PA(14:0_20:2)_1	17:0-18:1 PC-d5+AcO.IS	-80	-10	-50	-15
669.45	227.2	PA(14:0_20:3)_1	17:0-20:3 PC-d5+AcO.IS	-80	-10	-50	-15
667.434	227.2	PA(14:0_20:4)_1	17:0-20:3 PC-d5+AcO.IS	-80	-10	-50	-15
665.419	227.2	PA(14:0_20:5)_1	17:0-22:4 PC-d5+AcO.IS	-80	-10	-50	-15
695.466	227.2	PA(14:0_22:4)_1	17:0-22:4 PC-d5+AcO.IS	-80	-10	-50	-15
693.45	227.2	PA(14:0_22:5)_1	17:0-22:4 PC-d5+AcO.IS	-80	-10	-50	-15
691.434	227.2	PA(14:0_22:6)_1	17:0-22:4 PC-d5+AcO.IS	-80	-10	-50	-15
619.434	227.2	PA(16:0_14:0)_1	17:0-14:1 PC-d5+AcO.IS	-80	-10	-50	-15
645.45	255.2	PA(16:0_16:1)_1	17:0-14:1 PC-d5+AcO.IS	-80	-10	-50	-15
675.497	255.2	PA(16:0_18:0)_1	17:0-16:1 PC-d5+AcO.IS	-80	-10	-50	-15
673.481	255.2	PA(16:0_18:1)_1	17:0-18:1 PC-d5+AcO.IS	-80	-10	-50	-15
671.466	255.2	PA(16:0_18:2)_1	17:0-18:1 PC-d5+AcO.IS	-80	-10	-50	-15
669.45	255.2	PA(16:0_18:3)_1	17:0-16:1 PC-d5+AcO.IS	-80	-10	-50	-15
701.513	255.2	PA(16:0_20:1)_1	17:0-18:1 PC-d5+AcO.IS	-80	-10	-50	-15
699.497	255.2	PA(16:0_20:2)_1	17:0-18:1 PC-d5+AcO.IS	-80	-10	-50	-15
697.481	255.2	PA(16:0_20:3)_1	17:0-20:3 PC-d5+AcO.IS	-80	-10	-50	-15
695.466	255.2	PA(16:0_20:4)_1	17:0-22:4 PC-d5+AcO.IS	-80	-10	-50	-15
693.45	255.2	PA(16:0_20:5)_1	17:0-22:4 PC-d5+AcO.IS	-80	-10	-50	-15
723.497	255.2	PA(16:0_22:4)_1	17:0-20:3 PC-d5+AcO.IS	-80	-10	-50	-15
721.481	255.2	PA(16:0_22:5)_1	17:0-22:4 PC-d5+AcO.IS	-80	-10	-50	-15
719.466	255.2	PA(16:0_22:6)_1	17:0-22:4 PC-d5+AcO.IS	-80	-10	-50	-15
647.466	227.2	PA(18:0_14:0)_1	17:0-16:1 PC-d5+AcO.IS	-80	-10	-50	-15
673.481	283.2	PA(18:0_16:1)_1	17:0-16:1 PC-d5+AcO.IS	-80	-10	-50	-15
701.513	283.2	PA(18:0_18:1)_1	17:0-18:1 PC-d5+AcO.IS	-80	-10	-50	-15
699.497	283.2	PA(18:0_18:2)_1	17:0-18:1 PC-d5+AcO.IS	-80	-10	-50	-15
697.481	283.2	PA(18:0_18:3)_1	17:0-20:3 PC-d5+AcO.IS	-80	-10	-50	-15
731.56	283.2	PA(18:0_20:0)_1	17:0-18:1 PC-d5+AcO.IS	-80	-10	-50	-15
729.544	283.2	PA(18:0_20:1)_1	17:0-18:1 PC-d5+AcO.IS	-80	-10	-50	-15
727.528	283.2	PA(18:0_20:2)_1	17:0-20:3 PC-d5+AcO.IS	-80	-10	-50	-15
725.513	283.2	PA(18:0_20:3)_1	17:0-20:3 PC-d5+AcO.IS	-80	-10	-50	-15
723.497	283.2	PA(18:0_20:4)_1	17:0-20:3 PC-d5+AcO.IS	-80	-10	-50	-15
721.481	283.2	PA(18:0_20:5)_1	17:0-22:4 PC-d5+AcO.IS	-80	-10	-50	-15
751.528	283.2	PA(18:0_22:4)_1	17:0-22:4 PC-d5+AcO.IS	-80	-10	-50	-15
749.513	283.2	PA(18:0_22:5)_1	17:0-22:4 PC-d5+AcO.IS	-80	-10	-50	-15
747.497	283.2	PA(18:0_22:6)_1	17:0-22:4 PC-d5+AcO.IS	-80	-10	-50	-15
671.466	253.2	PA(18:1_16:1)_1	17:0-18:1 PC-d5+AcO.IS	-80	-10	-50	-15
697.481	281.2	PA(18:1_18:2)_1	17:0-18:1 PC-d5+AcO.IS	-80	-10	-50	-15
695.466	281.2	PA(18:1_18:3)_1	17:0-20:3 PC-d5+AcO.IS	-80	-10	-50	-15
727.528	281.2	PA(18:1_20:1)_1	17:0-20:3 PC-d5+AcO.IS	-80	-10	-50	-15
725.513	281.2	PA(18:1_20:2)_1	17:0-20:3 PC-d5+AcO.IS	-80	-10	-50	-15
723.497	281.2	PA(18:1_20:3)_1	17:0-20:3 PC-d5+AcO.IS	-80	-10	-50	-15
721.481	281.2	PA(18:1_20:4)_1	17:0-20:3 PC-d5+AcO.IS	-80	-10	-50	-15
719.466	281.2	PA(18:1_20:5)_1	17:0-20:3 PC-d5+AcO.IS	-80	-10	-50	-15
749.513	281.2	PA(18:1_22:4)_1	17:0-22:4 PC-d5+AcO.IS	-80	-10	-50	-15
747.497	281.2	PA(18:1_22:5)_1	17:0-22:4 PC-d5+AcO.IS	-80	-10	-50	-15
745.481	281.2	PA(18:1_22:6)_1	17:0-22:4 PC-d5+AcO.IS	-80	-10	-50	-15
669.45	253.2	PA(18:2_16:1)_1	17:0-20:3 PC-d5+AcO.IS	-80	-10	-50	-15
693.45	279.2	PA(18:2_18:3)_1	17:0-22:4 PC-d5+AcO.IS	-80	-10	-50	-15
725.513	279.2	PA(18:2_20:1)_1	17:0-20:3 PC-d5+AcO.IS	-80	-10	-50	-15
723.497	279.2	PA(18:2_20:2)_1	17:0-20:3 PC-d5+AcO.IS	-80	-10	-50	-15
721.481	279.2	PA(18:2_20:3)_1	17:0-20:3 PC-d5+AcO.IS	-80	-10	-50	-15
719.466	279.2	PA(18:2_20:4)_1	17:0-20:3 PC-d5+AcO.IS	-80	-10	-50	-15
717.45	279.2	PA(18:2_20:5)_1	17:0-22:4 PC-d5+AcO.IS	-80	-10	-50	-15
747.497	279.2	PA(18:2_22:4)_1	17:0-22:4 PC-d5+AcO.IS	-80	-10	-50	-15
745.481	279.2	PA(18:2_22:5)_1	17:0-22:4 PC-d5+AcO.IS	-80	-10	-50	-15
743.466	279.2	PA(18:2_22:6)_1	17:0-22:4 PC-d5+AcO.IS	-80	-10	-50	-15
701.513	311.2	PA(20:0_16:1)_1	17:0-18:1 PC-d5+AcO.IS	-80	-10	-50	-15
729.544	311.2	PA(20:0_18:1)_1	17:0-18:1 PC-d5+AcO.IS	-80	-10	-50	-15
727.528	311.2	PA(20:0_18:2)_1	17:0-20:3 PC-d5+AcO.IS	-80	-10	-50	-15
725.513	311.2	PA(20:0_18:3)_1	17:0-20:3 PC-d5+AcO.IS	-80	-10	-50	-15
757.575	311.2	PA(20:0_20:1)_1	17:0-22:4 PC-d5+AcO.IS	-80	-10	-50	-15
755.56	311.2	PA(20:0_20:2)_1	17:0-22:4 PC-d5+AcO.IS	-80	-10	-50	-15
753.544	311.2	PA(20:0_20:3)_1	17:0-20:3 PC-d5+AcO.IS	-80	-10	-50	-15
751.528	311.2	PA(20:0_20:4)_1	17:0-22:4 PC-d5+AcO.IS	-80	-10	-50	-15
749.513	311.2	PA(20:0_20:5)_1	17:0-22:4 PC-d5+AcO.IS	-80	-10	-50	-15
779.56	311.2	PA(20:0_22:4)_1	17:0-22:4 PC-d5+AcO.IS	-80	-10	-50	-15
777.544	311.2	PA(20:0_22:5)_1	17:0-22:4 PC-d5+AcO.IS	-80	-10	-50	-15
775.528	311.2	PA(20:0_22:6)_1	17:0-22:4 PC-d5+AcO.IS	-80	-10	-50	-15
790.56	227.2	PC(14:0_18:1)+AcO_1	17:0-14:1 PC-d5+AcO.IS	-80	-10	-50	-15
788.545	227.2	PC(14:0_18:2)+AcO_1	17:0-14:1 PC-d5+AcO.IS	-80	-10	-50	-15
786.529	227.2	PC(14:0_18:3)+AcO_1	17:0-14:1 PC-d5+AcO.IS	-80	-10	-50	-15
818.592	227.2	PC(14:0_20:1)+AcO_1	17:0-16:1 PC-d5+AcO.IS	-80	-10	-50	-15
816.576	227.2	PC(14:0_20:2)+AcO_1	17:0-16:1 PC-d5+AcO.IS	-80	-10	-50	-15
814.56	227.2	PC(14:0_20:3)+AcO_1	17:0-20:3 PC-d5+AcO.IS	-80	-10	-50	-15
812.545	227.2	PC(14:0_20:4)+AcO_1	17:0-22:4 PC-d5+AcO.IS	-80	-10	-50	-15
810.529	227.2	PC(14:0_20:5)+AcO_1	17:0-22:4 PC-d5+AcO.IS	-80	-10	-50	-15
840.576	227.2	PC(14:0_22:4)+AcO_1	17:0-22:4 PC-d5+AcO.IS	-80	-10	-50	-15
838.56	227.2	PC(14:0_22:5)+AcO_1	17:0-22:4 PC-d5+AcO.IS	-80	-10	-50	-15
836.545	227.2	PC(14:0_22:6)+AcO_1	17:0-22:4 PC-d5+AcO.IS	-80	-10	-50	-15
764.545	227.2	PC(16:0_14:0)+AcO_1	17:0-14:1 PC-d5+AcO.IS	-80	-10	-50	-15
790.56	255.2	PC(16:0_16:1)+AcO_1	17:0-16:1 PC-d5+AcO.IS	-80	-10	-50	-15
820.607	255.2	PC(16:0_18:0)+AcO_1	17:0-18:1 PC-d5+AcO.IS	-80	-10	-50	-15
818.592	255.2	PC(16:0_18:1)+AcO_1	17:0-16:1 PC-d5+AcO.IS	-80	-10	-50	-15
816.576	255.2	PC(16:0_18:2)+AcO_1	17:0-18:1 PC-d5+AcO.IS	-80	-10	-50	-15
814.56	255.2	PC(16:0_18:3)+AcO_1	17:0-20:3 PC-d5+AcO.IS	-80	-10	-50	-15
846.623	255.2	PC(16:0_20:1)+AcO_1	17:0-18:1 PC-d5+AcO.IS	-80	-10	-50	-15
844.607	255.2	PC(16:0_20:2)+AcO_1	17:0-20:3 PC-d5+AcO.IS	-80	-10	-50	-15
842.592	255.2	PC(16:0_20:3)+AcO_1	17:0-20:3 PC-d5+AcO.IS	-80	-10	-50	-15
840.576	255.2	PC(16:0_20:4)+AcO_1	17:0-22:4 PC-d5+AcO.IS	-80	-10	-50	-15
838.56	255.2	PC(16:0_20:5)+AcO_1	17:0-22:4 PC-d5+AcO.IS	-80	-10	-50	-15
868.607	255.2	PC(16:0_22:4)+AcO_1	17:0-22:4 PC-d5+AcO.IS	-80	-10	-50	-15
866.592	255.2	PC(16:0_22:5)+AcO_1	17:0-22:4 PC-d5+AcO.IS	-80	-10	-50	-15
864.576	255.2	PC(16:0_22:6)+AcO_1	17:0-22:4 PC-d5+AcO.IS	-80	-10	-50	-15
816.576	253.2	PC(16:1_18:1)+AcO_1	17:0-18:1 PC-d5+AcO.IS	-80	-10	-50	-15
814.56	253.2	PC(16:1_18:2)+AcO_1	17:0-18:1 PC-d5+AcO.IS	-80	-10	-50	-15
792.576	227.2	PC(18:0_14:0)+AcO_1	17:0-16:1 PC-d5+AcO.IS	-80	-10	-50	-15
818.592	283.1	PC(18:0_16:1)+AcO_1	17:0-18:1 PC-d5+AcO.IS	-80	-10	-50	-15
846.623	283.2	PC(18:0_18:1)+AcO_1	17:0-18:1 PC-d5+AcO.IS	-80	-10	-50	-15
844.607	283.2	PC(18:0_18:2)+AcO_1	17:0-20:3 PC-d5+AcO.IS	-80	-10	-50	-15
842.592	283.2	PC(18:0_18:3)+AcO_1	17:0-20:3 PC-d5+AcO.IS	-80	-10	-50	-15
876.67	283.2	PC(18:0_20:0)+AcO_1	17:0-14:1 PC-d5+AcO.IS	-80	-10	-50	-15
874.654	283.2	PC(18:0_20:1)+AcO_1	17:0-18:1 PC-d5+AcO.IS	-80	-10	-50	-15
872.639	283.2	PC(18:0_20:2)+AcO_1	17:0-18:1 PC-d5+AcO.IS	-80	-10	-50	-15
870.623	283.2	PC(18:0_20:3)+AcO_1	17:0-20:3 PC-d5+AcO.IS	-80	-10	-50	-15
868.607	283.2	PC(18:0_20:4)+AcO_1	17:0-22:4 PC-d5+AcO.IS	-80	-10	-50	-15
866.592	283.2	PC(18:0_20:5)+AcO_1	17:0-22:4 PC-d5+AcO.IS	-80	-10	-50	-15
896.639	283.2	PC(18:0_22:4)+AcO_1	17:0-22:4 PC-d5+AcO.IS	-80	-10	-50	-15
894.623	283.2	PC(18:0_22:5)+AcO_1	17:0-22:4 PC-d5+AcO.IS	-80	-10	-50	-15
892.607	283.2	PC(18:0_22:6)+AcO_1	17:0-22:4 PC-d5+AcO.IS	-80	-10	-50	-15
842.592	281.2	PC(18:1_18:2)+AcO_1	17:0-20:3 PC-d5+AcO.IS	-80	-10	-50	-15
840.576	281.2	PC(18:1_18:3)+AcO_1	17:0-22:4 PC-d5+AcO.IS	-80	-10	-50	-15
872.639	281.2	PC(18:1_20:1)+AcO_1	17:0-18:1 PC-d5+AcO.IS	-80	-10	-50	-15
870.623	281.2	PC(18:1_20:2)+AcO_1	17:0-20:3 PC-d5+AcO.IS	-80	-10	-50	-15
868.607	281.2	PC(18:1_20:3)+AcO_1	17:0-22:4 PC-d5+AcO.IS	-80	-10	-50	-15
866.592	281.2	PC(18:1_20:4)+AcO_1	17:0-22:4 PC-d5+AcO.IS	-80	-10	-50	-15
864.576	281.2	PC(18:1_20:5)+AcO_1	17:0-22:4 PC-d5+AcO.IS	-80	-10	-50	-15
894.623	281.2	PC(18:1_22:4)+AcO_1	17:0-22:4 PC-d5+AcO.IS	-80	-10	-50	-15
892.607	281.2	PC(18:1_22:5)+AcO_1	17:0-22:4 PC-d5+AcO.IS	-80	-10	-50	-15
890.592	281.2	PC(18:1_22:6)+AcO_1	17:0-22:4 PC-d5+AcO.IS	-80	-10	-50	-15
838.56	279.2	PC(18:2_18:3)+AcO_1	17:0-22:4 PC-d5+AcO.IS	-80	-10	-50	-15
870.623	279.2	PC(18:2_20:1)+AcO_1	17:0-20:3 PC-d5+AcO.IS	-80	-10	-50	-15
868.607	279.2	PC(18:2_20:2)+AcO_1	17:0-22:4 PC-d5+AcO.IS	-80	-10	-50	-15
866.592	279.2	PC(18:2_20:3)+AcO_1	17:0-22:4 PC-d5+AcO.IS	-80	-10	-50	-15
864.576	279.2	PC(18:2_20:4)+AcO_1	17:0-22:4 PC-d5+AcO.IS	-80	-10	-50	-15
862.56	279.2	PC(18:2_20:5)+AcO_1	17:0-22:4 PC-d5+AcO.IS	-80	-10	-50	-15
892.607	279.2	PC(18:2_22:4)+AcO_1	17:0-22:4 PC-d5+AcO.IS	-80	-10	-50	-15
890.592	279.2	PC(18:2_22:5)+AcO_1	17:0-22:4 PC-d5+AcO.IS	-80	-10	-50	-15
888.576	279.2	PC(18:2_22:6)+AcO_1	17:0-22:4 PC-d5+AcO.IS	-80	-10	-50	-15
846.623	311.2	PC(20:0_16:1)+AcO_1	17:0-18:1 PC-d5+AcO.IS	-80	-10	-50	-15
874.654	311.2	PC(20:0_18:1)+AcO_1	17:0-18:1 PC-d5+AcO.IS	-80	-10	-50	-15
870.623	311.2	PC(20:0_18:3)+AcO_1	17:0-20:3 PC-d5+AcO.IS	-80	-10	-50	-15
902.685	311.2	PC(20:0_20:1)+AcO_1	17:0-18:1 PC-d5+AcO.IS	-80	-10	-50	-15
900.67	311.2	PC(20:0_20:2)+AcO_1	17:0-20:3 PC-d5+AcO.IS	-80	-10	-50	-15
898.654	311.2	PC(20:0_20:3)+AcO_1	17:0-20:3 PC-d5+AcO.IS	-80	-10	-50	-15
896.639	311.2	PC(20:0_20:4)+AcO_1	17:0-22:4 PC-d5+AcO.IS	-80	-10	-50	-15
894.623	311.2	PC(20:0_20:5)+AcO_1	17:0-22:4 PC-d5+AcO.IS	-80	-10	-50	-15
924.67	311.2	PC(20:0_22:4)+AcO_1	17:0-22:4 PC-d5+AcO.IS	-80	-10	-50	-15
922.654	311.2	PC(20:0_22:5)+AcO_1	17:0-22:4 PC-d5+AcO.IS	-80	-10	-50	-15
920.639	311.2	PC(20:0_22:6)+AcO_1	17:0-22:4 PC-d5+AcO.IS	-80	-10	-50	-15
660.461	227.2	PE(14:0_16:1)_1	17:0-14:1 PE-d5.IS	-80	-10	-50	-15
688.492	227.2	PE(14:0_18:1)_1	17:0-14:1 PE-d5.IS	-80	-10	-50	-15
686.477	227.2	PE(14:0_18:2)_1	17:0-16:1 PE-d5.IS	-80	-10	-50	-15
684.461	227.2	PE(14:0_18:3)_1	17:0-16:1 PE-d5.IS	-80	-10	-50	-15
716.524	227.2	PE(14:0_20:1)_1	17:0-18:1 PE-d5.IS	-80	-10	-50	-15
714.508	227.2	PE(14:0_20:2)_1	17:0-18:1 PE-d5.IS	-80	-10	-50	-15
712.492	227.2	PE(14:0_20:3)_1	17:0-20:3 PE-d5.IS	-80	-10	-50	-15
710.477	227.2	PE(14:0_20:4)_1	17:0-22:4 PE-d5.IS	-80	-10	-50	-15
708.461	227.2	PE(14:0_20:5)_1	17:0-22:4 PE-d5.IS	-80	-10	-50	-15
738.508	227.2	PE(14:0_22:4)_1	17:0-22:4 PE-d5.IS	-80	-10	-50	-15
736.492	227.2	PE(14:0_22:5)_1	17:0-22:4 PE-d5.IS	-80	-10	-50	-15
734.477	227.2	PE(14:0_22:6)_1	17:0-22:4 PE-d5.IS	-80	-10	-50	-15
662.477	227.2	PE(16:0_14:0)_1	17:0-14:1 PE-d5.IS	-80	-10	-50	-15
688.492	255.2	PE(16:0_16:1)_1	17:0-14:1 PE-d5.IS	-80	-10	-50	-15
716.524	255.2	PE(16:0_18:1)_1	17:0-18:1 PE-d5.IS	-80	-10	-50	-15
714.508	255.2	PE(16:0_18:2)_1	17:0-18:1 PE-d5.IS	-80	-10	-50	-15
712.492	255.2	PE(16:0_18:3)_1	17:0-20:3 PE-d5.IS	-80	-10	-50	-15
744.555	255.2	PE(16:0_20:1)_1	17:0-18:1 PE-d5.IS	-80	-10	-50	-15
742.539	255.2	PE(16:0_20:2)_1	17:0-18:1 PE-d5.IS	-80	-10	-50	-15
740.524	255.2	PE(16:0_20:3)_1	17:0-20:3 PE-d5.IS	-80	-10	-50	-15
738.508	255.2	PE(16:0_20:4)_1	17:0-22:4 PE-d5.IS	-80	-10	-50	-15
736.492	255.2	PE(16:0_20:5)_1	17:0-22:4 PE-d5.IS	-80	-10	-50	-15
766.539	255.2	PE(16:0_22:4)_1	17:0-22:4 PE-d5.IS	-80	-10	-50	-15
764.524	255.2	PE(16:0_22:5)_1	17:0-22:4 PE-d5.IS	-80	-10	-50	-15
762.508	255.2	PE(16:0_22:6)_1	17:0-22:4 PE-d5.IS	-80	-10	-50	-15
690.508	227.2	PE(18:0_14:0)_1	17:0-14:1 PE-d5.IS	-80	-10	-50	-15
718.539	255.2	PE(18:0_16:0)_1	17:0-18:1 PE-d5.IS	-80	-10	-50	-15
716.524	283.2	PE(18:0_16:1)_1	17:0-18:1 PE-d5.IS	-80	-10	-50	-15
744.555	283.2	PE(18:0_18:1)_1	17:0-18:1 PE-d5.IS	-80	-10	-50	-15
742.539	283.2	PE(18:0_18:2)_1	17:0-18:1 PE-d5.IS	-80	-10	-50	-15
740.524	283.2	PE(18:0_18:3)_1	17:0-20:3 PE-d5.IS	-80	-10	-50	-15
772.586	283.2	PE(18:0_20:1)_1	17:0-18:1 PE-d5.IS	-80	-10	-50	-15
770.57	283.2	PE(18:0_20:2)_1	17:0-18:1 PE-d5.IS	-80	-10	-50	-15
768.555	283.2	PE(18:0_20:3)_1	17:0-20:3 PE-d5.IS	-80	-10	-50	-15
766.539	283.2	PE(18:0_20:4)_1	17:0-22:4 PE-d5.IS	-80	-10	-50	-15
764.524	283.2	PE(18:0_20:5)_1	17:0-22:4 PE-d5.IS	-80	-10	-50	-15
794.57	283.2	PE(18:0_22:4)_1	17:0-22:4 PE-d5.IS	-80	-10	-50	-15
792.555	283.2	PE(18:0_22:5)_1	17:0-22:4 PE-d5.IS	-80	-10	-50	-15
790.539	283.2	PE(18:0_22:6)_1	17:0-22:4 PE-d5.IS	-80	-10	-50	-15
714.508	253.2	PE(18:1_16:1)_1	17:0-18:1 PE-d5.IS	-80	-10	-50	-15
740.524	281.2	PE(18:1_18:2)_1	17:0-20:3 PE-d5.IS	-80	-10	-50	-15
738.508	281.2	PE(18:1_18:3)_1	17:0-20:3 PE-d5.IS	-80	-10	-50	-15
770.57	281.2	PE(18:1_20:1)_1	17:0-20:3 PE-d5.IS	-80	-10	-50	-15
768.555	281.2	PE(18:1_20:2)_1	17:0-20:3 PE-d5.IS	-80	-10	-50	-15
766.539	281.2	PE(18:1_20:3)_1	17:0-20:3 PE-d5.IS	-80	-10	-50	-15
764.524	281.2	PE(18:1_20:4)_1	17:0-22:4 PE-d5.IS	-80	-10	-50	-15
762.508	281.2	PE(18:1_20:5)_1	17:0-22:4 PE-d5.IS	-80	-10	-50	-15
792.555	281.2	PE(18:1_22:4)_1	17:0-22:4 PE-d5.IS	-80	-10	-50	-15
790.539	281.2	PE(18:1_22:5)_1	17:0-22:4 PE-d5.IS	-80	-10	-50	-15
788.524	281.2	PE(18:1_22:6)_1	17:0-22:4 PE-d5.IS	-80	-10	-50	-15
712.492	253.2	PE(18:2_16:1)_1	17:0-20:3 PE-d5.IS	-80	-10	-50	-15
736.492	279.2	PE(18:2_18:3)_1	17:0-22:4 PE-d5.IS	-80	-10	-50	-15
768.555	279.2	PE(18:2_20:1)_1	17:0-20:3 PE-d5.IS	-80	-10	-50	-15
766.539	279.2	PE(18:2_20:2)_1	17:0-22:4 PE-d5.IS	-80	-10	-50	-15
764.524	279.2	PE(18:2_20:3)_1	17:0-22:4 PE-d5.IS	-80	-10	-50	-15
762.508	279.2	PE(18:2_20:4)_1	17:0-22:4 PE-d5.IS	-80	-10	-50	-15
760.492	279.2	PE(18:2_20:5)_1	17:0-22:4 PE-d5.IS	-80	-10	-50	-15
790.539	279.2	PE(18:2_22:4)_1	17:0-22:4 PE-d5.IS	-80	-10	-50	-15
788.524	279.2	PE(18:2_22:5)_1	17:0-22:4 PE-d5.IS	-80	-10	-50	-15
786.508	279.2	PE(18:2_22:6)_1	17:0-22:4 PE-d5.IS	-80	-10	-50	-15
719.487	227.2	PG(14:0_18:1)_1	17:0-14:1 PG-d5.IS	-80	-10	-50	-15
717.471	227.2	PG(14:0_18:2)_1	17:0-14:1 PG-d5.IS	-80	-10	-50	-15
715.456	227.2	PG(14:0_18:3)_1	17:0-20:3 PG-d5.IS	-80	-10	-50	-15
747.518	227.2	PG(14:0_20:1)_1	17:0-18:1 PG-d5.IS	-80	-10	-50	-15
745.503	227.2	PG(14:0_20:2)_1	17:0-18:1 PG-d5.IS	-80	-10	-50	-15
743.487	227.2	PG(14:0_20:3)_1	17:0-20:3 PG-d5.IS	-80	-10	-50	-15
741.471	227.2	PG(14:0_20:4)_1	17:0-22:4 PG-d5.IS	-80	-10	-50	-15
739.456	227.2	PG(14:0_20:5)_1	17:0-22:4 PG-d5.IS	-80	-10	-50	-15
769.503	227.2	PG(14:0_22:4)_1	17:0-22:4 PG-d5.IS	-80	-10	-50	-15
767.487	227.2	PG(14:0_22:5)_1	17:0-22:4 PG-d5.IS	-80	-10	-50	-15
765.471	227.2	PG(14:0_22:6)_1	17:0-22:4 PG-d5.IS	-80	-10	-50	-15
693.471	227.2	PG(16:0_14:0)_1	17:0-14:1 PG-d5.IS	-80	-10	-50	-15
719.487	255.2	PG(16:0_16:1)_1	17:0-16:1 PG-d5.IS	-80	-10	-50	-15
749.534	255.2	PG(16:0_18:0)_1	17:0-18:1 PG-d5.IS	-80	-10	-50	-15
747.518	255.2	PG(16:0_18:1)_1	17:0-18:1 PG-d5.IS	-80	-10	-50	-15
745.503	255.2	PG(16:0_18:2)_1	17:0-18:1 PG-d5.IS	-80	-10	-50	-15
743.487	255.2	PG(16:0_18:3)_1	17:0-20:3 PG-d5.IS	-80	-10	-50	-15
775.549	255.2	PG(16:0_20:1)_1	17:0-18:1 PG-d5.IS	-80	-10	-50	-15
773.534	255.2	PG(16:0_20:2)_1	17:0-20:3 PG-d5.IS	-80	-10	-50	-15
771.518	255.2	PG(16:0_20:3)_1	17:0-20:3 PG-d5.IS	-80	-10	-50	-15
769.503	255.2	PG(16:0_20:4)_1	17:0-22:4 PG-d5.IS	-80	-10	-50	-15
767.487	255.2	PG(16:0_20:5)_1	17:0-22:4 PG-d5.IS	-80	-10	-50	-15
797.534	255.2	PG(16:0_22:4)_1	17:0-22:4 PG-d5.IS	-80	-10	-50	-15
795.518	255.2	PG(16:0_22:5)_1	17:0-22:4 PG-d5.IS	-80	-10	-50	-15
793.503	255.2	PG(16:0_22:6)_1	17:0-22:4 PG-d5.IS	-80	-10	-50	-15
721.503	227.2	PG(18:0_14:0)_1	17:0-14:1 PG-d5.IS	-80	-10	-50	-15
747.518	283.2	PG(18:0_16:1)_1	17:0-14:1 PG-d5.IS	-80	-10	-50	-15
775.549	283.2	PG(18:0_18:1)_1	17:0-16:1 PG-d5.IS	-80	-10	-50	-15
773.534	283.2	PG(18:0_18:2)_1	17:0-18:1 PG-d5.IS	-80	-10	-50	-15
771.518	283.2	PG(18:0_18:3)_1	17:0-20:3 PG-d5.IS	-80	-10	-50	-15
805.596	283.2	PG(18:0_20:0)_1	17:0-18:1 PG-d5.IS	-80	-10	-50	-15
803.581	283.2	PG(18:0_20:1)_1	17:0-18:1 PG-d5.IS	-80	-10	-50	-15
801.565	283.2	PG(18:0_20:2)_1	17:0-20:3 PG-d5.IS	-80	-10	-50	-15
799.549	283.2	PG(18:0_20:3)_1	17:0-20:3 PG-d5.IS	-80	-10	-50	-15
797.534	283.2	PG(18:0_20:4)_1	17:0-22:4 PG-d5.IS	-80	-10	-50	-15
795.518	283.2	PG(18:0_20:5)_1	17:0-22:4 PG-d5.IS	-80	-10	-50	-15
825.565	283.2	PG(18:0_22:4)_1	17:0-22:4 PG-d5.IS	-80	-10	-50	-15
823.549	283.2	PG(18:0_22:5)_1	17:0-22:4 PG-d5.IS	-80	-10	-50	-15
821.534	283.2	PG(18:0_22:6)_1	17:0-22:4 PG-d5.IS	-80	-10	-50	-15
745.503	253.2	PG(18:1_16:1)_1	17:0-16:1 PG-d5.IS	-80	-10	-50	-15
771.518	281.2	PG(18:1_18:2)_1	17:0-18:1 PG-d5.IS	-80	-10	-50	-15
769.503	281.2	PG(18:1_18:3)_1	17:0-20:3 PG-d5.IS	-80	-10	-50	-15
801.565	281.2	PG(18:1_20:1)_1	17:0-18:1 PG-d5.IS	-80	-10	-50	-15
799.549	281.2	PG(18:1_20:2)_1	17:0-20:3 PG-d5.IS	-80	-10	-50	-15
797.534	281.2	PG(18:1_20:3)_1	17:0-20:3 PG-d5.IS	-80	-10	-50	-15
795.518	281.2	PG(18:1_20:4)_1	17:0-22:4 PG-d5.IS	-80	-10	-50	-15
793.503	281.2	PG(18:1_20:5)_1	17:0-22:4 PG-d5.IS	-80	-10	-50	-15
823.549	281.2	PG(18:1_22:4)_1	17:0-22:4 PG-d5.IS	-80	-10	-50	-15
821.534	281.2	PG(18:1_22:5)_1	17:0-22:4 PG-d5.IS	-80	-10	-50	-15
819.518	281.2	PG(18:1_22:6)_1	17:0-22:4 PG-d5.IS	-80	-10	-50	-15
743.487	253.2	PG(18:2_16:1)_1	17:0-20:3 PG-d5.IS	-80	-10	-50	-15
767.487	279.2	PG(18:2_18:3)_1	17:0-22:4 PG-d5.IS	-80	-10	-50	-15
799.549	279.2	PG(18:2_20:1)_1	17:0-20:3 PG-d5.IS	-80	-10	-50	-15
797.534	279.2	PG(18:2_20:2)_1	17:0-22:4 PG-d5.IS	-80	-10	-50	-15
795.518	279.2	PG(18:2_20:3)_1	17:0-22:4 PG-d5.IS	-80	-10	-50	-15
793.503	279.2	PG(18:2_20:4)_1	17:0-22:4 PG-d5.IS	-80	-10	-50	-15
791.487	279.2	PG(18:2_20:5)_1	17:0-22:4 PG-d5.IS	-80	-10	-50	-15
821.534	279.2	PG(18:2_22:4)_1	17:0-22:4 PG-d5.IS	-80	-10	-50	-15
819.518	279.2	PG(18:2_22:5)_1	17:0-22:4 PG-d5.IS	-80	-10	-50	-15
817.503	279.2	PG(18:2_22:6)_1	17:0-22:4 PG-d5.IS	-80	-10	-50	-15
775.549	311.2	PG(20:0_16:1)_1	17:0-16:1 PG-d5.IS	-80	-10	-50	-15
803.581	311.2	PG(20:0_18:1)_1	17:0-18:1 PG-d5.IS	-80	-10	-50	-15
801.565	311.2	PG(20:0_18:2)_1	17:0-18:1 PG-d5.IS	-80	-10	-50	-15
799.549	311.2	PG(20:0_18:3)_1	17:0-20:3 PG-d5.IS	-80	-10	-50	-15
831.612	311.2	PG(20:0_20:1)_1	17:0-18:1 PG-d5.IS	-80	-10	-50	-15
829.596	311.2	PG(20:0_20:2)_1	17:0-18:1 PG-d5.IS	-80	-10	-50	-15
827.581	311.2	PG(20:0_20:3)_1	17:0-20:3 PG-d5.IS	-80	-10	-50	-15
825.565	311.2	PG(20:0_20:4)_1	17:0-20:3 PG-d5.IS	-80	-10	-50	-15
823.549	311.2	PG(20:0_20:5)_1	17:0-22:4 PG-d5.IS	-80	-10	-50	-15
853.596	311.2	PG(20:0_22:4)_1	17:0-22:4 PG-d5.IS	-80	-10	-50	-15
851.581	311.2	PG(20:0_22:5)_1	17:0-22:4 PG-d5.IS	-80	-10	-50	-15
849.565	311.2	PG(20:0_22:6)_1	17:0-22:4 PG-d5.IS	-80	-10	-50	-15
807.503	227.2	PI(14:0_18:1)_1	17:0-16:1 PI-d5.IS	-80	-10	-50	-15
805.487	227.2	PI(14:0_18:2)_1	17:0-18:1 PI-d5.IS	-80	-10	-50	-15
803.472	227.2	PI(14:0_18:3)_1	17:0-20:3 PI-d5.IS	-80	-10	-50	-15
835.534	227.2	PI(14:0_20:1)_1	17:0-16:1 PI-d5.IS	-80	-10	-50	-15
833.518	227.2	PI(14:0_20:2)_1	17:0-18:1 PI-d5.IS	-80	-10	-50	-15
831.503	227.2	PI(14:0_20:3)_1	17:0-20:3 PI-d5.IS	-80	-10	-50	-15
829.487	227.2	PI(14:0_20:4)_1	17:0-22:4 PI-d5.IS	-80	-10	-50	-15
827.472	227.2	PI(14:0_20:5)_1	17:0-22:4 PI-d5.IS	-80	-10	-50	-15
857.518	227.2	PI(14:0_22:4)_1	17:0-22:4 PI-d5.IS	-80	-10	-50	-15
855.503	227.2	PI(14:0_22:5)_1	17:0-22:4 PI-d5.IS	-80	-10	-50	-15
853.487	227.2	PI(14:0_22:6)_1	17:0-22:4 PI-d5.IS	-80	-10	-50	-15
781.487	227.2	PI(16:0_14:0)_1	17:0-14:1 PI-d5.IS	-80	-10	-50	-15
807.503	255.2	PI(16:0_16:1)_1	17:0-14:1 PI-d5.IS	-80	-10	-50	-15
837.55	255.2	PI(16:0_18:0)_1	17:0-18:1 PI-d5.IS	-80	-10	-50	-15
835.534	255.2	PI(16:0_18:1)_1	17:0-18:1 PI-d5.IS	-80	-10	-50	-15
833.518	255.2	PI(16:0_18:2)_1	17:0-18:1 PI-d5.IS	-80	-10	-50	-15
814.561	255.2	PI(16:0_18:3)_1	17:0-20:3 PI-d5.IS	-80	-10	-50	-15
863.565	255.2	PI(16:0_20:1)_1	17:0-18:1 PI-d5.IS	-80	-10	-50	-15
861.55	255.2	PI(16:0_20:2)_1	17:0-18:1 PI-d5.IS	-80	-10	-50	-15
859.534	255.2	PI(16:0_20:3)_1	17:0-20:3 PI-d5.IS	-80	-10	-50	-15
857.518	255.2	PI(16:0_20:4)_1	17:0-20:3 PI-d5.IS	-80	-10	-50	-15
855.503	255.2	PI(16:0_20:5)_1	17:0-22:4 PI-d5.IS	-80	-10	-50	-15
885.55	255.2	PI(16:0_22:4)_1	17:0-22:4 PI-d5.IS	-80	-10	-50	-15
883.534	255.2	PI(16:0_22:5)_1	17:0-22:4 PI-d5.IS	-80	-10	-50	-15
881.518	255.2	PI(16:0_22:6)_1	17:0-22:4 PI-d5.IS	-80	-10	-50	-15
809.518	227.2	PI(18:0_14:0)_1	17:0-16:1 PI-d5.IS	-80	-10	-50	-15
835.534	283.2	PI(18:0_16:1)_1	17:0-18:1 PI-d5.IS	-80	-10	-50	-15
863.565	283.2	PI(18:0_18:1)_1	17:0-18:1 PI-d5.IS	-80	-10	-50	-15
861.55	283.2	PI(18:0_18:2)_1	17:0-18:1 PI-d5.IS	-80	-10	-50	-15
859.534	283.2	PI(18:0_18:3)_1	17:0-20:3 PI-d5.IS	-80	-10	-50	-15
893.612	283.2	PI(18:0_20:0)_1	17:0-18:1 PI-d5.IS	-80	-10	-50	-15
891.597	283.2	PI(18:0_20:1)_1	17:0-18:1 PI-d5.IS	-80	-10	-50	-15
889.581	283.2	PI(18:0_20:2)_1	17:0-18:1 PI-d5.IS	-80	-10	-50	-15
887.565	283.2	PI(18:0_20:3)_1	17:0-20:3 PI-d5.IS	-80	-10	-50	-15
885.55	283.2	PI(18:0_20:4)_1	17:0-22:4 PI-d5.IS	-80	-10	-50	-15
883.534	283.2	PI(18:0_20:5)_1	17:0-22:4 PI-d5.IS	-80	-10	-50	-15
913.581	283.2	PI(18:0_22:4)_1	17:0-22:4 PI-d5.IS	-80	-10	-50	-15
911.565	283.2	PI(18:0_22:5)_1	17:0-22:4 PI-d5.IS	-80	-10	-50	-15
909.55	283.2	PI(18:0_22:6)_1	17:0-22:4 PI-d5.IS	-80	-10	-50	-15
833.518	253.2	PI(18:1_16:1)_1	17:0-16:1 PI-d5.IS	-80	-10	-50	-15
859.534	281.2	PI(18:1_18:2)_1	17:0-18:1 PI-d5.IS	-80	-10	-50	-15
857.518	281.2	PI(18:1_18:3)_1	17:0-20:3 PI-d5.IS	-80	-10	-50	-15
889.581	281.2	PI(18:1_20:1)_1	17:0-18:1 PI-d5.IS	-80	-10	-50	-15
887.565	281.2	PI(18:1_20:2)_1	17:0-20:3 PI-d5.IS	-80	-10	-50	-15
885.55	281.2	PI(18:1_20:3)_1	17:0-20:3 PI-d5.IS	-80	-10	-50	-15
883.534	281.2	PI(18:1_20:4)_1	17:0-22:4 PI-d5.IS	-80	-10	-50	-15
881.518	281.2	PI(18:1_20:5)_1	17:0-22:4 PI-d5.IS	-80	-10	-50	-15
911.565	281.2	PI(18:1_22:4)_1	17:0-22:4 PI-d5.IS	-80	-10	-50	-15
909.55	281.2	PI(18:1_22:5)_1	17:0-22:4 PI-d5.IS	-80	-10	-50	-15
907.534	281.2	PI(18:1_22:6)_1	17:0-22:4 PI-d5.IS	-80	-10	-50	-15
831.503	253.2	PI(18:2_16:1)_1	17:0-22:4 PI-d5.IS	-80	-10	-50	-15
855.503	279.2	PI(18:2_18:3)_1	17:0-22:4 PI-d5.IS	-80	-10	-50	-15
887.565	279.2	PI(18:2_20:1)_1	17:0-20:3 PI-d5.IS	-80	-10	-50	-15
885.55	279.2	PI(18:2_20:2)_1	17:0-20:3 PI-d5.IS	-80	-10	-50	-15
883.534	279.2	PI(18:2_20:3)_1	17:0-20:3 PI-d5.IS	-80	-10	-50	-15
881.518	279.2	PI(18:2_20:4)_1	17:0-20:3 PI-d5.IS	-80	-10	-50	-15
879.503	279.2	PI(18:2_20:5)_1	17:0-22:4 PI-d5.IS	-80	-10	-50	-15
909.55	279.2	PI(18:2_22:4)_1	17:0-22:4 PI-d5.IS	-80	-10	-50	-15
907.534	279.2	PI(18:2_22:5)_1	17:0-22:4 PI-d5.IS	-80	-10	-50	-15
905.518	279.2	PI(18:2_22:6)_1	17:0-22:4 PI-d5.IS	-80	-10	-50	-15
863.565	311.2	PI(20:0_16:1)_1	17:0-18:1 PI-d5.IS	-80	-10	-50	-15
891.597	311.2	PI(20:0_18:1)_1	17:0-18:1 PI-d5.IS	-80	-10	-50	-15
889.581	311.2	PI(20:0_18:2)_1	17:0-18:1 PI-d5.IS	-80	-10	-50	-15
887.565	311.2	PI(20:0_18:3)_1	17:0-20:3 PI-d5.IS	-80	-10	-50	-15
919.628	311.2	PI(20:0_20:1)_1	17:0-18:1 PI-d5.IS	-80	-10	-50	-15
917.612	311.2	PI(20:0_20:2)_1	17:0-20:3 PI-d5.IS	-80	-10	-50	-15
915.597	311.2	PI(20:0_20:3)_1	17:0-20:3 PI-d5.IS	-80	-10	-50	-15
913.581	311.2	PI(20:0_20:4)_1	17:0-20:3 PI-d5.IS	-80	-10	-50	-15
911.565	311.2	PI(20:0_20:5)_1	17:0-22:4 PI-d5.IS	-80	-10	-50	-15
939.597	311.2	PI(20:0_22:5)_1	17:0-22:4 PI-d5.IS	-80	-10	-50	-15
937.581	311.2	PI(20:0_22:6)_1	17:0-22:4 PI-d5.IS	-80	-10	-50	-15
732.482	227.2	PS(14:0_18:1)_1	17:0-16:1 PS-d5.IS	-80	-10	-50	-15
730.466	227.2	PS(14:0_18:2)_1	17:0-18:1 PS-d5.IS	-80	-10	-50	-15
728.451	227.2	PS(14:0_18:3)_1	17:0-20:3 PS-d5.IS	-80	-10	-50	-15
760.513	227.2	PS(14:0_20:1)_1	17:0-18:1 PS-d5.IS	-80	-10	-50	-15
758.498	227.2	PS(14:0_20:2)_1	17:0-18:1 PS-d5.IS	-80	-10	-50	-15
756.482	227.2	PS(14:0_20:3)_1	17:0-20:3 PS-d5.IS	-80	-10	-50	-15
754.466	227.2	PS(14:0_20:4)_1	17:0-22:4 PS-d5.IS	-80	-10	-50	-15
752.451	227.2	PS(14:0_20:5)_1	17:0-22:4 PS-d5.IS	-80	-10	-50	-15
782.498	227.2	PS(14:0_22:4)_1	17:0-22:4 PS-d5.IS	-80	-10	-50	-15
780.482	227.2	PS(14:0_22:5)_1	17:0-22:4 PS-d5.IS	-80	-10	-50	-15
778.466	227.2	PS(14:0_22:6)_1	17:0-22:4 PS-d5.IS	-80	-10	-50	-15
706.466	227.2	PS(16:0_14:0)_1	17:0-14:1 PS-d5.IS	-80	-10	-50	-15
732.482	255.2	PS(16:0_16:1)_1	17:0-16:1 PS-d5.IS	-80	-10	-50	-15
760.513	255.1	PS(16:0_18:0)_1	17:0-16:1 PS-d5.IS	-80	-10	-50	-15
760.513	255.2	PS(16:0_18:1)_1	17:0-16:1 PS-d5.IS	-80	-10	-50	-15
758.498	255.2	PS(16:0_18:2)_1	17:0-18:1 PS-d5.IS	-80	-10	-50	-15
756.482	255.2	PS(16:0_18:3)_1	17:0-20:3 PS-d5.IS	-80	-10	-50	-15
788.545	255.2	PS(16:0_20:1)_1	17:0-18:1 PS-d5.IS	-80	-10	-50	-15
786.529	255.2	PS(16:0_20:2)_1	17:0-18:1 PS-d5.IS	-80	-10	-50	-15
784.513	255.2	PS(16:0_20:3)_1	17:0-20:3 PS-d5.IS	-80	-10	-50	-15
782.498	255.2	PS(16:0_20:4)_1	17:0-20:3 PS-d5.IS	-80	-10	-50	-15
780.482	255.2	PS(16:0_20:5)_1	17:0-20:3 PS-d5.IS	-80	-10	-50	-15
810.529	255.2	PS(16:0_22:4)_1	17:0-22:4 PS-d5.IS	-80	-10	-50	-15
808.513	255.2	PS(16:0_22:5)_1	17:0-22:4 PS-d5.IS	-80	-10	-50	-15
806.498	255.2	PS(16:0_22:6)_1	17:0-22:4 PS-d5.IS	-80	-10	-50	-15
734.498	227.2	PS(18:0_14:0)_1	17:0-14:1 PS-d5.IS	-80	-10	-50	-15
760.513	283.2	PS(18:0_16:1)_1	17:0-16:1 PS-d5.IS	-80	-10	-50	-15
788.545	283.2	PS(18:0_18:1)_1	17:0-18:1 PS-d5.IS	-80	-10	-50	-15
786.529	283.2	PS(18:0_18:2)_1	17:0-18:1 PS-d5.IS	-80	-10	-50	-15
784.513	283.2	PS(18:0_18:3)_1	17:0-20:3 PS-d5.IS	-80	-10	-50	-15
818.592	283.2	PS(18:0_20:0)_1	17:0-20:3 PS-d5.IS	-80	-10	-50	-15
816.576	283.2	PS(18:0_20:1)_1	17:0-18:1 PS-d5.IS	-80	-10	-50	-15
814.56	283.2	PS(18:0_20:2)_1	17:0-20:3 PS-d5.IS	-80	-10	-50	-15
812.545	283.2	PS(18:0_20:3)_1	17:0-20:3 PS-d5.IS	-80	-10	-50	-15
810.529	283.2	PS(18:0_20:4)_1	17:0-20:3 PS-d5.IS	-80	-10	-50	-15
808.513	283.2	PS(18:0_20:5)_1	17:0-22:4 PS-d5.IS	-80	-10	-50	-15
838.56	283.2	PS(18:0_22:4)_1	17:0-22:4 PS-d5.IS	-80	-10	-50	-15
836.545	283.2	PS(18:0_22:5)_1	17:0-22:4 PS-d5.IS	-80	-10	-50	-15
834.529	283.2	PS(18:0_22:6)_1	17:0-22:4 PS-d5.IS	-80	-10	-50	-15
758.498	253.2	PS(18:1_16:1)_1	17:0-18:1 PS-d5.IS	-80	-10	-50	-15
784.513	281.2	PS(18:1_18:2)_1	17:0-20:3 PS-d5.IS	-80	-10	-50	-15
782.498	281.2	PS(18:1_18:3)_1	17:0-20:3 PS-d5.IS	-80	-10	-50	-15
814.56	281.2	PS(18:1_20:1)_1	17:0-20:3 PS-d5.IS	-80	-10	-50	-15
812.545	281.2	PS(18:1_20:2)_1	17:0-20:3 PS-d5.IS	-80	-10	-50	-15
810.529	281.2	PS(18:1_20:3)_1	17:0-20:3 PS-d5.IS	-80	-10	-50	-15
808.513	281.2	PS(18:1_20:4)_1	17:0-22:4 PS-d5.IS	-80	-10	-50	-15
806.498	281.2	PS(18:1_20:5)_1	17:0-22:4 PS-d5.IS	-80	-10	-50	-15
836.545	281.2	PS(18:1_22:4)_1	17:0-22:4 PS-d5.IS	-80	-10	-50	-15
834.529	281.2	PS(18:1_22:5)_1	17:0-22:4 PS-d5.IS	-80	-10	-50	-15
832.513	281.2	PS(18:1_22:6)_1	17:0-22:4 PS-d5.IS	-80	-10	-50	-15
756.482	253.2	PS(18:2_16:1)_1	17:0-20:3 PS-d5.IS	-80	-10	-50	-15
780.482	279.2	PS(18:2_18:3)_1	17:0-22:4 PS-d5.IS	-80	-10	-50	-15
812.545	279.2	PS(18:2_20:1)_1	17:0-20:3 PS-d5.IS	-80	-10	-50	-15
810.529	279.2	PS(18:2_20:2)_1	17:0-20:3 PS-d5.IS	-80	-10	-50	-15
808.513	279.2	PS(18:2_20:3)_1	17:0-22:4 PS-d5.IS	-80	-10	-50	-15
806.498	279.2	PS(18:2_20:4)_1	17:0-22:4 PS-d5.IS	-80	-10	-50	-15
804.482	279.2	PS(18:2_20:5)_1	17:0-22:4 PS-d5.IS	-80	-10	-50	-15
834.529	279.2	PS(18:2_22:4)_1	17:0-22:4 PS-d5.IS	-80	-10	-50	-15
832.513	279.2	PS(18:2_22:5)_1	17:0-22:4 PS-d5.IS	-80	-10	-50	-15
830.498	279.2	PS(18:2_22:6)_1	17:0-22:4 PS-d5.IS	-80	-10	-50	-15
788.545	311.2	PS(20:0_16:1)_1	17:0-18:1 PS-d5.IS	-80	-10	-50	-15
814.56	311.2	PS(20:0_18:1)_1	17:0-18:1 PS-d5.IS	-80	-10	-50	-15
814.561	311.2	PS(20:0_18:2)_1	17:0-18:1 PS-d5.IS	-80	-10	-50	-15
812.545	311.2	PS(20:0_18:3)_1	17:0-20:3 PS-d5.IS	-80	-10	-50	-15
844.607	311.2	PS(20:0_20:1)_1	17:0-20:3 PS-d5.IS	-80	-10	-50	-15
842.592	311.2	PS(20:0_20:2)_1	17:0-22:4 PS-d5.IS	-80	-10	-50	-15
840.576	311.2	PS(20:0_20:3)_1	17:0-22:4 PS-d5.IS	-80	-10	-50	-15
838.56	311.2	PS(20:0_20:4)_1	17:0-22:4 PS-d5.IS	-80	-10	-50	-15
836.545	311.2	PS(20:0_20:5)_1	17:0-22:4 PS-d5.IS	-80	-10	-50	-15
866.592	311.2	PS(20:0_22:4)_1	17:0-22:4 PS-d5.IS	-80	-10	-50	-15
864.576	311.2	PS(20:0_22:5)_1	17:0-22:4 PS-d5.IS	-80	-10	-50	-15
862.56	311.2	PS(20:0_22:6)_1	17:0-22:4 PS-d5.IS	-80	-10	-50	-15
381.205	227.202	LPA(14:0)	15:0 Lyso PC-d5.IS	-80	-10	-50	-15
409.236	255.233	LPA(16:0)	15:0 Lyso PC-d5.IS	-80	-10	-50	-15
407.22	253.217	LPA(16:1)	17:0 Lyso PC-d5.IS	-80	-10	-50	-15
437.267	283.264	LPA(18:0)	17:0 Lyso PC-d5.IS	-80	-10	-50	-15
435.252	281.249	LPA(18:1)	19:0 Lyso PC-d5.IS	-80	-10	-50	-15
433.236	279.233	LPA(18:2)	19:0 Lyso PC-d5.IS	-80	-10	-50	-15
471.22	277.217	LPA(18:3)	19:0 Lyso PC-d5.IS	-80	-10	-50	-15
465.299	311.3	LPA(20:0)	19:0 Lyso PC-d5.IS	-80	-10	-50	-15
463.283	309.28	LPA(20:1)	19:0 Lyso PC-d5.IS	-80	-10	-50	-15
461.267	307.264	LPA(20:2)	19:0 Lyso PC-d5.IS	-80	-10	-50	-15
459.252	305.249	LPA(20:3)	19:0 Lyso PC-d5.IS	-80	-10	-50	-15
457.236	303.233	LPA(20:4)	19:0 Lyso PC-d5.IS	-80	-10	-50	-15
455.22	301.217	LPA(20:5)	19:0 Lyso PC-d5.IS	-80	-10	-50	-15
526.317	227.202	LPC(14:0)+AcO	15:0 Lyso PC-d5.IS	-80	-10	-43	-15
554.346	255.233	LPC(16:0)+AcO	17:0 Lyso PC-d5.IS	-80	-10	-50	-15
552.331	253.217	LPC(16:1)+AcO	17:0 Lyso PC-d5.IS	-80	-10	-50	-15
582.378	283.264	LPC(18:0)+AcO	17:0 Lyso PC-d5.IS	-80	-10	-50	-15
580.362	281.249	LPC(18:1)+AcO	17:0 Lyso PC-d5.IS	-80	-10	-50	-15
578.346	279.233	LPC(18:2)+AcO	17:0 Lyso PC-d5.IS	-80	-10	-50	-15
576.331	277.217	LPC(18:3)+AcO	19:0 Lyso PC-d5.IS	-80	-10	-50	-15
610.409	311.3	LPC(20:0)+AcO	19:0 Lyso PC-d5.IS	-80	-10	-50	-15
608.393	309.28	LPC(20:1)+AcO	19:0 Lyso PC-d5.IS	-80	-10	-50	-15
606.378	307.264	LPC(20:2)+AcO	19:0 Lyso PC-d5.IS	-80	-10	-50	-15
604.362	305.249	LPC(20:3)+AcO	19:0 Lyso PC-d5.IS	-80	-10	-50	-15
602.346	303.233	LPC(20:4)+AcO	19:0 Lyso PC-d5.IS	-80	-10	-50	-15
600.331	301.217	LPC(20:5)+AcO	19:0 Lyso PC-d5.IS	-80	-10	-50	-15
630.364	331.264	LPC(22:4)+AcO	19:0 Lyso PC-d5.IS	-80	-10	-50	-15
628.362	329.249	LPC(22:5)+AcO	19:0 Lyso PC-d5.IS	-80	-10	-50	-15
626.346	327.233	LPC(22:6)+AcO	19:0 Lyso PC-d5.IS	-80	-10	-50	-15
424.247	227.202	LPE(14:0)	15:0 Lyso PE-d5.IS	-80	-10	-50	-15
452.278	255.233	LPE(16:0)	17:0 Lyso PE-d5.IS	-80	-10	-40	-15
450.263	253.217	LPE(16:1)	17:0 Lyso PE-d5.IS	-80	-10	-40	-15
480.31	283.264	LPE(18:0)	17:0 Lyso PE-d5.IS	-80	-10	-40	-15
478.293	281.249	LPE(18:1)	17:0 Lyso PE-d5.IS	-80	-10	-40	-15
476.278	279.233	LPE(18:2)	17:0 Lyso PE-d5.IS	-80	-10	-40	-15
474.263	277.217	LPE(18:3)	17:0 Lyso PE-d5.IS	-80	-10	-40	-15
508.341	311.3	LPE(20:0)	19:0 Lyso PE-d5.IS	-80	-10	-40	-15
506.325	309.28	LPE(20:1)	19:0 Lyso PE-d5.IS	-80	-10	-40	-15
504.31	307.264	LPE(20:2)	19:0 Lyso PE-d5.IS	-80	-10	-40	-15
502.294	305.249	LPE(20:3)	19:0 Lyso PE-d5.IS	-80	-10	-40	-15
500.278	303.233	LPE(20:4)	19:0 Lyso PE-d5.IS	-80	-10	-40	-15
498.263	301.217	LPE(20:5)	19:0 Lyso PE-d5.IS	-80	-10	-40	-15
528.31	331.264	LPE(22:4)	19:0 Lyso PE-d5.IS	-80	-10	-40	-15
526.294	329.249	LPE(22:5)	19:0 Lyso PE-d5.IS	-80	-10	-40	-15
524.278	327.233	LPE(22:6)	19:0 Lyso PE-d5.IS	-80	-10	-40	-15
455.241	227.202	LPG(14:0)	15:0 Lyso PG-d5.IS	-80	-10	-50	-15
483.273	255.233	LPG(16:0)	17:0 Lyso PG-d5.IS	-80	-10	-50	-15
481.257	253.217	LPG(16:1)	17:0 Lyso PG-d5.IS	-80	-10	-50	-15
511.304	283.264	LPG(18:0)	17:0 Lyso PG-d5.IS	-80	-10	-50	-15
509.289	281.249	LPG(18:1)	17:0 Lyso PG-d5.IS	-80	-10	-50	-15
507.273	279.233	LPG(18:2)	17:0 Lyso PG-d5.IS	-80	-10	-50	-15
505.257	277.217	LPG(18:3)	17:0 Lyso PG-d5.IS	-80	-10	-50	-15
539.335	311.3	LPG(20:0)	19:0 Lyso PG-d5.IS	-80	-10	-50	-15
537.32	309.28	LPG(20:1)	19:0 Lyso PG-d5.IS	-80	-10	-50	-15
535.304	307.264	LPG(20:2)	19:0 Lyso PG-d5.IS	-80	-10	-50	-15
533.289	305.249	LPG(20:3)	19:0 Lyso PG-d5.IS	-80	-10	-50	-15
531.273	303.233	LPG(20:4)	19:0 Lyso PG-d5.IS	-80	-10	-50	-15
529.257	301.217	LPG(20:5)	19:0 Lyso PG-d5.IS	-80	-10	-50	-15
559.304	331.264	LPG(22:4)	19:0 Lyso PG-d5.IS	-80	-10	-50	-15
557.289	329.249	LPG(22:5)	19:0 Lyso PG-d5.IS	-80	-10	-50	-15
555.273	327.233	LPG(22:6)	19:0 Lyso PG-d5.IS	-80	-10	-50	-15
543.258	227.202	LPI(14:0)	17:0 Lyso PI-d5.IS	-80	-10	-50	-15
571.289	255.233	LPI(16:0)	17:0 Lyso PI-d5.IS	-80	-10	-50	-15
569.273	253.217	LPI(16:1)	17:0 Lyso PI-d5.IS	-80	-10	-50	-15
599.32	283.264	LPI(18:0)	17:0 Lyso PI-d5.IS	-80	-10	-50	-15
597.305	281.249	LPI(18:1)	17:0 Lyso PI-d5.IS	-80	-10	-50	-15
595.289	279.233	LPI(18:2)	17:0 Lyso PI-d5.IS	-80	-10	-50	-15
593.273	277.217	LPI(18:3)	17:0 Lyso PI-d5.IS	-80	-10	-50	-15
627.352	311.3	LPI(20:0)	19:0 Lyso PI-d5.IS	-80	-10	-50	-15
625.336	309.28	LPI(20:1)	19:0 Lyso PI-d5.IS	-80	-10	-50	-15
623.32	307.264	LPI(20:2)	19:0 Lyso PI-d5.IS	-80	-10	-50	-15
621.305	305.249	LPI(20:3)	19:0 Lyso PI-d5.IS	-80	-10	-50	-15
619.289	303.233	LPI(20:4)	19:0 Lyso PI-d5.IS	-80	-10	-50	-15
617.273	301.217	LPI(20:5)	19:0 Lyso PI-d5.IS	-80	-10	-50	-15
647.32	331.264	LPI(22:4)	19:0 Lyso PI-d5.IS	-80	-10	-50	-15
645.305	329.249	LPI(22:5)	19:0 Lyso PI-d5.IS	-80	-10	-50	-15
643.289	327.233	LPI(22:6)	19:0 Lyso PI-d5.IS	-80	-10	-50	-15
468.233	227.202	LPS(14:0)	17:0 Lyso PG-d5.IS	-80	-10	-50	-15
496.268	255.233	LPS(16:0)	17:0 Lyso PG-d5.IS	-80	-10	-50	-15
494.252	253.217	LPS(16:1)	19:0 Lyso PG-d5.IS	-80	-10	-50	-15
524.299	283.264	LPS(18:0)	17:0 Lyso PG-d5.IS	-80	-10	-50	-15
522.284	281.249	LPS(18:1)	17:0 Lyso PG-d5.IS	-80	-10	-50	-15
520.268	279.233	LPS(18:2)	17:0 Lyso PG-d5.IS	-80	-10	-50	-15
518.252	277.217	LPS(18:3)	17:0 Lyso PG-d5.IS	-80	-10	-50	-15
552.331	311.3	LPS(20:0)	19:0 Lyso PG-d5.IS	-80	-10	-50	-15
550.315	309.28	LPS(20:1)	19:0 Lyso PG-d5.IS	-80	-10	-50	-15
548.299	307.264	LPS(20:2)	19:0 Lyso PG-d5.IS	-80	-10	-50	-15
546.284	305.249	LPS(20:3)	19:0 Lyso PG-d5.IS	-80	-10	-50	-15
544.268	303.233	LPS(20:4)	19:0 Lyso PG-d5.IS	-80	-10	-50	-15
542.252	301.217	LPS(20:5)	19:0 Lyso PG-d5.IS	-80	-10	-50	-15
572.299	331.264	LPS(22:4)	19:0 Lyso PG-d5.IS	-80	-10	-50	-15
570.284	329.249	LPS(22:5)	19:0 Lyso PG-d5.IS	-80	-10	-50	-15
568.268	327.233	LPS(22:6)	19:0 Lyso PG-d5.IS	-80	-10	-50	-15
227.1	227.1	FFA(14:0)		-80	-10	-10	-15
225.1	225.1	FFA(14:1)		-80	-10	-10	-15
255.1	255.1	FFA(16:0)		-80	-10	-10	-15
253.1	253.1	FFA(16:1)		-80	-10	-10	-15
251.1	251.1	FFA(16:2)		-80	-10	-10	-15
283.2	283.2	FFA(18:0)		-80	-10	-10	-15
281.2	281.2	FFA(18:1)		-80	-10	-10	-15
279.2	279.2	FFA(18:2)		-80	-10	-10	-15
277.2	277.2	FFA(18:3)		-80	-10	-10	-15
311.2	311.2	FFA(20:0)		-80	-10	-10	-15
309.2	309.2	FFA(20:1)		-80	-10	-10	-15
307.2	307.2	FFA(20:2)		-80	-10	-10	-15
305.2	305.2	FFA(20:3)		-80	-10	-10	-15
303.2	303.2	FFA(20:4)		-80	-10	-10	-15
301.2	301.2	FFA(20:5)		-80	-10	-10	-15
331.3	331.3	FFA(22:4)		-80	-10	-10	-15
329.2	329.2	FFA(22:5)		-80	-10	-10	-15
327.2	327.2	FFA(22:6)		-80	-10	-10	-15
367.3	367.3	FFA(24:0)		-80	-10	-10	-15
365.3	365.3	FFA(24:1)		-80	-10	-10	-15
781.6	225.3	17:0-14:1 PC-d5+AcO.IS		-80	-10	-60	-15
809.6	253.3	17:0-16:1 PC-d5+AcO.IS		-80	-10	-60	-15
837.6	281.3	17:0-18:1 PC-d5+AcO.IS		-80	-10	-50	-15
861.6	305.3	17:0-20:3 PC-d5+AcO.IS		-80	-10	-50	-15
887.6	331.3	17:0-22:4 PC-d5+AcO.IS		-80	-10	-50	-15
679.5	225.3	17:0-14:1 PE-d5.IS		-80	-10	-50	-15
707.5	253.3	17:0-16:1 PE-d5.IS		-80	-10	-50	-15
735.6	281.3	17:0-18:1 PE-d5.IS		-80	-10	-50	-15
759.6	305.3	17:0-20:3 PE-d5.IS		-80	-10	-50	-15
785.6	331.3	17:0-22:4 PE-d5.IS		-80	-10	-50	-15
710.5	225.3	17:0-14:1 PG-d5.IS		-80	-10	-50	-15
738.5	253.3	17:0-16:1 PG-d5.IS		-80	-10	-50	-15
766.6	281.3	17:0-18:1 PG-d5.IS		-80	-10	-50	-15
790.6	305.3	17:0-20:3 PG-d5.IS		-80	-10	-50	-15
816.6	331.3	17:0-22:4 PG-d5.IS		-80	-10	-40	-15
723.5	269.3	17:0-14:1 PS-d5.IS		-80	-10	-40	-15
751.5	269.3	17:0-16:1 PS-d5.IS		-80	-10	-38	-15
779.5	269.3	17:0-18:1 PS-d5.IS		-80	-10	-60	-15
803.5	269.3	17:0-20:3 PS-d5.IS		-80	-10	-60	-15
829.6	269.3	17:0-22:4 PS-d5.IS		-80	-10	-50	-15
798.6	269.3	17:0-14:1 PI-d5.IS		-80	-10	-50	-15
826.6	269.3	17:0-16:1 PI-d5.IS		-80	-10	-50	-15
854.6	269.3	17:0-18:1 PI-d5.IS		-80	-10	-50	-15
878.6	269.3	17:0-20:3 PI-d5.IS		-80	-10	-50	-15
904.6	269.3	17:0-22:4 PI-d5.IS		-80	-10	-50	-15
562.3	241.2	15:0 Lyso PI-d5.IS		-80	-10	-50	-15
590.4	269.2	17:0 Lyso PI-d5.IS		-80	-10	-50	-15
618.4	297.2	19:0 Lyso PI-d5.IS		-80	-10	-50	-15
487.3	241.2	15:0 Lyso PS-d5.IS		-80	-10	-50	-15
515.3	269.2	17:0 Lyso PS-d5.IS		-80	-10	-50	-15
543.3	297.2	19:0 Lyso PS-d5.IS		-80	-10	-50	-15
474.3	241.2	15:0 Lyso PG-d5.IS		-80	-10	-40	-15
502.3	269.2	17:0 Lyso PG-d5.IS		-80	-10	-40	-15
530.3	297.2	19:0 Lyso PG-d5.IS		-80	-10	-38	-15
545.3	241.2	15:0 Lyso PC-d5.IS		-80	-10	-60	-15
573.4	269.2	17:0 Lyso PC-d5.IS		-80	-10	-60	-15
601.4	297.2	19:0 Lyso PC-d5.IS		-80	-10	-50	-15
443.3	241.2	15:0 Lyso PE-d5.IS		-80	-10	-50	-15
471.3	269.2	17:0 Lyso PE-d5.IS		-80	-10	-50	-15
499.4	297.2	19:0 Lyso PE-d5.IS		-80	-10	-50	-15

## Sheet: Table.S5
Table.S5 Expected and detected retention time of phospholipids.
Index	Component Name	Component Group Name	Expected RT	Retention Time	Precursor Mass	Fragment Mass	Area	Retention Time Delta (min)
1	PA(16:0_14:0)	PA(16:0_14:0)	4.75511	4.91897	619.434	227.202	79013.6	-0.163859
2	PA(16:0_16:0)	PA(16:0_16:0)	5.11211	5.31415	647.466	255.233	1.73347e+06	-0.202043
3	PA(16:0_16:1)	PA(16:0_16:1)	4.81436	4.98073	645.45	253.217	101560	-0.166371
4	PA(16:0_18:1)	PA(16:0_18:1)	5.17903	5.30448	673.481	281.249	3.35864e+06	-0.125445
5	PA(16:0_18:2)	PA(16:0_18:2)	4.87573	5.00682	671.466	279.233	611048	-0.131087
6	PA(16:0_20:2)	PA(16:0_20:2)	5.24586	5.35817	699.497	307.264	77963.2	-0.112304
7	PA(16:0_20:3)	PA(16:0_20:3)	4.93956	5.12678	697.481	305.249	32411.6	-0.18722
8	PA(16:0_20:4)	PA(16:0_20:4)	4.65155	5.00682	695.466	303.233	171293	-0.355267
9	PA(16:0_22:4)	PA(16:0_22:4)	5.00351	5.25501	723.497	331.264	52817.9	-0.251499
10	PA(16:0_22:6)	PA(16:0_22:6)	4.43644	4.91897	719.466	327.233	43369.4	-0.482524
11	PA(18:0_18:0)	PA(18:0_18:0)	5.91681	6.3244	703.528	283.264	713583	-0.40759
12	PA(18:0_20:0)	PA(18:0_20:0)	6.3645	6.85143	731.56	283.264	2.89592e+06	-0.486928
13	PA(18:1_18:1)	PA(18:1_18:1)	5.24586	5.33228	699.497	281.249	5.18822e+06	-0.0864133
14	PA(18:1_18:2)	PA(18:1_18:2)	4.93956	5.00682	697.481	279.233	200043	-0.0672593
15	PA(18:1_20:1)	PA(18:1_20:1)	5.6428	5.665	727.528	309.28	146443	-0.0222008
16	PA(18:1_20:2)	PA(18:1_20:2)	5.31328	5.35817	725.513	307.264	52773	-0.0448852
17	PA(18:1_20:4)	PA(18:1_20:4)	4.71387	5.00682	721.481	303.233	130813	-0.292947
18	PA(18:2_16:1)	PA(18:2_16:1)	4.59107	4.7433	669.45	279.233	74362.6	-0.152231
19	PA(18:2_18:2)	PA(18:2_18:2)	4.65155	4.83113	695.466	279.233	320623	-0.179584
20	PA(18:2_20:1)	PA(18:2_20:1)	5.31328	5.35817	725.513	309.28	76562.4	-0.0448852
21	PA(18:2_20:5)	PA(18:2_20:5)	4.17871	N/A	717.45	301.217	N/A	#VALUE!
22	PA(18:2_22:5)	PA(18:2_22:5)	4.4925	N/A	745.481	329.249	N/A	#VALUE!
23	PA(18:2_22:6)	PA(18:2_22:6)	4.23086	4.7433	743.466	327.233	15730.5	-0.512441
24	PC(14:0_14:0)+AcO	PC(14:0_14:0)+AcO	5.13502	5.09465	736.513	227.202	344311	0.0403678
25	PC(14:0_18:1)+AcO	PC(14:0_18:1)+AcO	5.6	5.57314	790.56	281.249	7.52815e+06	0.0268604
26	PC(14:0_18:2)+AcO	PC(14:0_18:2)+AcO	5.28	5.30122	788.545	279.233	3.35893e+06	-0.0212207
27	PC(14:0_18:3)+AcO	PC(14:0_18:3)+AcO	4.98	5.00682	786.529	277.217	71552.7	-0.0268167
28	PC(14:0_20:1)+AcO	PC(14:0_20:1)+AcO	6.05	5.79737	818.592	309.28	244097	0.252633
29	PC(14:0_20:2)+AcO	PC(14:0_20:2)+AcO	5.7	5.58665	816.576	307.264	140507	0.113353
30	PC(14:0_20:3)+AcO	PC(14:0_20:3)+AcO	5.38	5.35817	814.56	305.249	760584	0.0218333
31	PC(14:0_20:4)+AcO	PC(14:0_20:4)+AcO	5.07	5.18248	812.545	303.233	1.60107e+06	-0.112483
32	PC(14:0_20:5)+AcO	PC(14:0_20:5)+AcO	4.78	4.91897	810.529	301.217	48577.2	-0.138967
33	PC(14:0_22:4)+AcO	PC(14:0_22:4)+AcO	5.49	5.35817	840.576	331.264	3.47522e+06	0.131833
34	PC(14:0_22:5)+AcO	PC(14:0_22:5)+AcO	5.18	5.30897	838.56	329.249	375812	-0.128968
35	PC(14:0_22:6)+AcO	PC(14:0_22:6)+AcO	4.88	5.00682	836.545	327.233	866029	-0.126817
36	PC(16:0_14:0)+AcO	PC(16:0_14:0)+AcO	5.51	5.446	764.545	227.202	6.26488e+06	0.064
37	PC(16:0_16:0)+AcO	PC(16:0_16:0)+AcO	5.93	5.8852	792.576	255.233	8.56318e+07	0.0448
38	PC(16:0_16:1)+AcO	PC(16:0_16:1)+AcO	5.6	5.53385	790.56	253.217	1.42254e+07	0.06615
39	PC(16:0_18:0)+AcO	PC(16:0_18:0)+AcO	6.41	6.41223	820.607	283.264	1.69961e+07	-0.00223333
40	PC(16:0_18:1)+AcO	PC(16:0_18:1)+AcO	6.05	5.97303	818.592	281.249	6.43316e+07	0.0769667
41	PC(16:0_18:2)+AcO	PC(16:0_18:2)+AcO	5.7	5.62168	816.576	279.233	8.43185e+07	0.0783167
42	PC(16:0_18:3)+AcO	PC(16:0_18:3)+AcO	5.38	5.39281	814.56	277.217	6.32522e+06	-0.0128072
43	PC(16:0_20:1)+AcO	PC(16:0_20:1)+AcO	6.55	6.41223	846.623	309.28	5.52013e+06	0.137767
44	PC(16:0_20:2)+AcO	PC(16:0_20:2)+AcO	6.18	6.06088	844.607	307.264	2.06931e+06	0.119117
45	PC(16:0_20:3)+AcO	PC(16:0_20:3)+AcO	5.82	5.78604	842.592	305.249	1.62615e+07	0.0339607
46	PC(16:0_20:4)+AcO	PC(16:0_20:4)+AcO	5.49	5.53385	840.576	303.233	3.18585e+07	-0.04385
47	PC(16:0_20:5)+AcO	PC(16:0_20:5)+AcO	5.18	5.35437	838.56	301.217	1.87022e+06	-0.174366
48	PC(16:0_22:4)+AcO	PC(16:0_22:4)+AcO	5.95	5.8852	868.607	331.264	2.19736e+06	0.0648
49	PC(16:0_22:5)+AcO	PC(16:0_22:5)+AcO	5.62	5.70569	866.592	329.249	3.49583e+06	-0.0856869
50	PC(16:0_22:6)+AcO	PC(16:0_22:6)+AcO	5.3	5.446	864.576	327.233	1.69024e+07	-0.146
51	PC(16:1_18:1)+AcO	PC(16:1_18:1)+AcO	5.55	5.55021	816.576	281.249	2.06595e+06	-0.000212673
52	PC(16:1_18:2)+AcO	PC(16:1_18:2)+AcO	5.38	5.27033	814.56	253.217	5.42046e+06	0.109667
53	PC(18:0_14:0)+AcO	PC(18:0_14:0)+AcO	5.93	5.8852	792.576	227.202	260430	0.0448
54	PC(18:0_16:1)+AcO	PC(18:0_16:1)+AcO	6.05	5.99573	818.592	253.217	1.0036e+06	0.0542652
55	PC(18:0_18:0)+AcO	PC(18:0_18:0)+AcO	6.94	6.9626	848.639	283.264	1.86013e+06	-0.0226008
56	PC(18:0_18:1)+AcO	PC(18:0_18:1)+AcO	6.55	6.50007	846.623	281.249	7.36976e+07	0.0499333
57	PC(18:0_18:2)+AcO	PC(18:0_18:2)+AcO	6.18	6.06088	844.607	279.233	5.76789e+07	0.119117
58	PC(18:0_18:3)+AcO	PC(18:0_18:3)+AcO	5.82	5.79737	842.592	277.217	974027	0.0226333
59	PC(18:0_20:0)+AcO	PC(18:0_20:0)+AcO	7.53	7.55413	876.67	283.264	48708.7	-0.0241333
60	PC(18:0_20:1)+AcO	PC(18:0_20:1)+AcO	7.1	6.98243	874.654	309.28	2.41037e+06	0.117573
61	PC(18:0_20:2)+AcO	PC(18:0_20:2)+AcO	6.7	6.58792	872.639	307.264	2.72096e+06	0.112083
62	PC(18:0_20:3)+AcO	PC(18:0_20:3)+AcO	6.31	6.23655	870.623	305.249	7.43836e+06	0.07345
63	PC(18:0_20:4)+AcO	PC(18:0_20:4)+AcO	5.95	6.04805	868.607	303.233	1.42469e+07	-0.0980465
64	PC(18:0_20:5)+AcO	PC(18:0_20:5)+AcO	5.62	5.70952	866.592	301.217	447012	-0.0895167
65	PC(18:0_22:4)+AcO	PC(18:0_22:4)+AcO	6.46	6.36515	896.639	331.264	1.86108e+06	0.094855
66	PC(18:0_22:5)+AcO	PC(18:0_22:5)+AcO	6.09	6.17012	894.623	329.249	1.37592e+06	-0.0801211
67	PC(18:0_22:6)+AcO	PC(18:0_22:6)+AcO	5.75	5.8852	892.607	327.233	5.43755e+06	-0.1352
68	PC(18:1_16:1)+AcO	PC(18:1_16:1)+AcO	5.7	5.55342	816.576	253.217	1.27407e+06	0.146585
69	PC(18:1_18:1)+AcO	PC(18:1_18:1)+AcO	6.18	5.97303	844.607	281.249	8.23217e+06	0.206967
70	PC(18:1_18:2)+AcO	PC(18:1_18:2)+AcO	5.82	5.69432	842.592	279.233	1.02952e+07	0.125677
71	PC(18:1_18:3)+AcO	PC(18:1_18:3)+AcO	5.49	5.40509	840.576	277.217	857139	0.0849092
72	PC(18:1_20:1)+AcO	PC(18:1_20:1)+AcO	6.7	6.50007	872.639	309.28	1.31692e+06	0.199933
73	PC(18:1_20:2)+AcO	PC(18:1_20:2)+AcO	6.31	6.06088	870.623	307.264	291735	0.249117
74	PC(18:1_20:3)+AcO	PC(18:1_20:3)+AcO	5.95	5.79737	868.607	305.249	2.17894e+06	0.152633
75	PC(18:1_20:4)+AcO	PC(18:1_20:4)+AcO	5.62	5.62168	866.592	303.233	3.12553e+06	-0.00168333
76	PC(18:1_20:5)+AcO	PC(18:1_20:5)+AcO	5.3	5.35817	864.576	301.217	315918	-0.0581667
77	PC(18:1_22:4)+AcO	PC(18:1_22:4)+AcO	6.09	5.8852	894.623	331.264	158918	0.2048
78	PC(18:1_22:5)+AcO	PC(18:1_22:5)+AcO	5.75	5.79737	892.607	329.249	342109	-0.0473667
79	PC(18:1_22:6)+AcO	PC(18:1_22:6)+AcO	5.42	5.53385	890.592	327.233	944050	-0.11385
80	PC(18:2_16:1)+AcO	PC(18:2_16:1)+AcO	5.38	5.27033	814.56	279.233	1.58781e+07	0.109667
81	PC(18:2_18:2)+AcO	PC(18:2_18:2)+AcO	5.49	5.35817	840.576	279.233	3.30558e+07	0.131833
82	PC(18:2_18:3)+AcO	PC(18:2_18:3)+AcO	5.18	5.17695	838.56	277.217	897626	0.00304686
83	PC(18:2_20:1)+AcO	PC(18:2_20:1)+AcO	6.31	6.06088	870.623	309.28	299536	0.249117
84	PC(18:2_20:2)+AcO	PC(18:2_20:2)+AcO	5.95	5.70952	868.607	307.264	543767	0.240483
85	PC(18:2_20:3)+AcO	PC(18:2_20:3)+AcO	5.62	5.446	866.592	305.249	1.21159e+06	0.174
86	PC(18:2_20:4)+AcO	PC(18:2_20:4)+AcO	5.3	5.27635	864.576	303.233	7.13822e+06	0.0236473
87	PC(18:2_20:5)+AcO	PC(18:2_20:5)+AcO	5	5.09465	862.56	301.217	57119.3	-0.09465
88	PC(18:2_22:4)+AcO	PC(18:2_22:4)+AcO	5.75	5.68872	892.607	331.264	73556.3	0.0612815
89	PC(18:2_22:5)+AcO	PC(18:2_22:5)+AcO	5.42	5.36746	890.592	329.249	367137	0.0525442
90	PC(18:2_22:6)+AcO	PC(18:2_22:6)+AcO	5.12	5.19439	888.576	327.233	1.87497e+06	-0.0743949
91	PC(20:0_16:1)+AcO	PC(20:0_16:1)+AcO	6.55	6.53128	846.623	253.217	149677	0.0187192
92	PC(20:0_18:1)+AcO	PC(20:0_18:1)+AcO	7.1	7.0271	874.654	281.249	1.88515e+06	0.0729
93	PC(20:0_18:3)+AcO	PC(20:0_18:3)+AcO	6.31	6.3244	870.623	277.217	22231.5	-0.0144
94	PC(20:0_20:1)+AcO	PC(20:0_20:1)+AcO	7.7	7.51987	902.685	309.28	56037.4	0.180129
95	PC(20:0_20:2)+AcO	PC(20:0_20:2)+AcO	7.26	7.11495	900.67	307.264	57936.9	0.14505
96	PC(20:0_20:3)+AcO	PC(20:0_20:3)+AcO	6.85	6.76358	898.654	305.249	434659	0.0864167
97	PC(20:0_20:4)+AcO	PC(20:0_20:4)+AcO	6.46	6.50007	896.639	303.233	1.29105e+06	-0.0400667
98	PC(20:0_20:5)+AcO	PC(20:0_20:5)+AcO	6.09	N/A	894.623	301.217	N/A	#VALUE!
99	PC(20:0_22:4)+AcO	PC(20:0_22:4)+AcO	7.01	6.93927	924.67	331.264	18464.1	0.0707333
100	PC(20:0_22:5)+AcO	PC(20:0_22:5)+AcO	6.62	6.63401	922.654	329.249	47826.9	-0.0140073
101	PC(20:0_22:6)+AcO	PC(20:0_22:6)+AcO	6.24	6.39463	920.639	327.233	70172.8	-0.154628
102	PE(14:0_14:0)-H	PE(14:0_14:0)-H	5.2	N/A	634.445	227.202	N/A	#VALUE!
103	PE(14:0_16:1)	PE(14:0_16:1)	5.26	5.18248	660.461	253.217	25666	0.0775167
104	PE(14:0_18:1)	PE(14:0_18:1)	5.67	5.62168	688.492	281.249	87231.5	0.0483167
105	PE(14:0_18:2)	PE(14:0_18:2)	5.34	5.28823	686.477	279.233	572041	0.0517698
106	PE(14:0_18:3)	PE(14:0_18:3)	5.03	N/A	684.461	277.217	N/A	#VALUE!
107	PE(14:0_20:1)	PE(14:0_20:1)	6.13	6.58792	716.524	309.28	16793.2	-0.457917
108	PE(14:0_20:2)	PE(14:0_20:2)	5.77	N/A	714.508	307.264	N/A	#VALUE!
109	PE(14:0_20:3)	PE(14:0_20:3)	5.44	5.35817	712.492	305.249	39755.9	0.0818333
110	PE(14:0_20:4)	PE(14:0_20:4)	5.12	5.29984	710.477	303.233	25412	-0.179835
111	PE(14:0_20:5)	PE(14:0_20:5)	4.82	N/A	708.461	301.217	N/A	#VALUE!
112	PE(14:0_22:4)	PE(14:0_22:4)	5.55	5.53385	738.508	331.264	10834	0.01615
113	PE(14:0_22:5)	PE(14:0_22:5)	5.23	5.35817	736.492	329.249	18090.2	-0.128167
114	PE(14:0_22:6)	PE(14:0_22:6)	4.93	5.27033	734.477	327.233	52681.7	-0.340333
115	PE(16:0_14:0)	PE(16:0_14:0)	5.58	5.55734	662.477	255.233	25110.8	0.0226624
116	PE(16:0_16:0)	PE(16:0_16:0)	6.01	6.03532	690.508	255.233	2.64535e+06	-0.025323
117	PE(16:0_16:1)	PE(16:0_16:1)	5.67	5.62168	688.492	253.217	2.05514e+06	0.0483167
118	PE(16:0_18:1)	PE(16:0_18:1)	6.13	6.06088	716.524	281.249	5.33944e+07	0.0691167
119	PE(16:0_18:2)	PE(16:0_18:2)	5.77	5.70952	714.508	279.233	7.98126e+07	0.0604833
120	PE(16:0_18:3)	PE(16:0_18:3)	5.44	5.446	712.492	277.217	2.12451e+06	-0.006
121	PE(16:0_20:1)	PE(16:0_20:1)	6.65	6.50007	744.555	309.28	9.66266e+06	0.149933
122	PE(16:0_20:2)	PE(16:0_20:2)	6.26	6.14872	742.539	307.264	1.38987e+06	0.111283
123	PE(16:0_20:3)	PE(16:0_20:3)	5.89	5.79737	740.524	305.249	9.07886e+06	0.0926333
124	PE(16:0_20:4)	PE(16:0_20:4)	5.55	5.62168	738.508	303.233	5.18823e+07	-0.0716833
125	PE(16:0_20:5)	PE(16:0_20:5)	5.23	5.35817	736.492	301.217	2.49285e+06	-0.128167
126	PE(16:0_22:4)	PE(16:0_22:4)	6.03	5.97303	766.539	331.264	6.70006e+06	0.0569667
127	PE(16:0_22:5)	PE(16:0_22:5)	5.68	5.76489	764.524	329.249	6.24011e+06	-0.0848897
128	PE(16:0_22:6)	PE(16:0_22:6)	5.35	5.53385	762.508	327.233	1.33897e+07	-0.18385
129	PE(18:0_14:0)	PE(18:0_14:0)	6.01	6.08668	690.508	283.264	15211.9	-0.0766777
130	PE(18:0_16:0)	PE(18:0_16:0)	6.5	6.50007	718.539	283.264	5.73684e+06	-6.66667e-05
131	PE(18:0_16:1)	PE(18:0_16:1)	6.13	6.06088	716.524	283.264	989267	0.0691167
132	PE(18:0_18:0)	PE(18:0_18:0)	7.05	7.0271	746.57	283.264	930857	0.0229
133	PE(18:0_18:1)	PE(18:0_18:1)	6.65	6.56035	744.555	281.249	1.42123e+08	0.0896452
134	PE(18:0_18:2)	PE(18:0_18:2)	6.26	6.14872	742.539	279.233	8.05248e+07	0.111283
135	PE(18:0_18:3)	PE(18:0_18:3)	5.89	5.8852	740.524	277.217	1.49794e+06	0.0048
136	PE(18:0_20:1)	PE(18:0_20:1)	7.22	7.05226	772.586	309.28	8.25193e+06	0.167744
137	PE(18:0_20:2)	PE(18:0_20:2)	6.8	6.64233	770.57	307.264	5.77558e+06	0.15767
138	PE(18:0_20:3)	PE(18:0_20:3)	6.4	6.3244	768.555	305.249	2.34823e+07	0.0756
139	PE(18:0_20:4)	PE(18:0_20:4)	6.03	6.09875	766.539	303.233	1.40204e+08	-0.0687505
140	PE(18:0_20:5)	PE(18:0_20:5)	5.68	5.79737	764.524	301.217	1.81162e+06	-0.117367
141	PE(18:0_22:4)	PE(18:0_22:4)	6.55	6.44412	794.57	331.264	7.75397e+07	0.105877
142	PE(18:0_22:5)	PE(18:0_22:5)	6.18	6.2164	792.555	329.249	9.2845e+06	-0.0364017
143	PE(18:0_22:6)	PE(18:0_22:6)	5.82	5.97303	790.539	327.233	3.50493e+07	-0.153033
144	PE(18:1_16:1)	PE(18:1_16:1)	5.77	5.62168	714.508	281.249	1.70924e+06	0.148317
145	PE(18:1_18:1)	PE(18:1_18:1)	6.26	6.06088	742.539	281.249	4.75958e+07	0.199117
146	PE(18:1_18:2)	PE(18:1_18:2)	5.89	5.70952	740.524	279.233	3.83918e+07	0.180483
147	PE(18:1_18:3)	PE(18:1_18:3)	5.55	5.446	738.508	277.217	872131	0.104
148	PE(18:1_20:1)	PE(18:1_20:1)	6.8	6.54083	770.57	309.28	1.29847e+07	0.259166
149	PE(18:1_20:2)	PE(18:1_20:2)	6.4	6.14872	768.555	307.264	984832	0.251283
150	PE(18:1_20:3)	PE(18:1_20:3)	6.03	5.8852	766.539	305.249	4.32851e+06	0.1448
151	PE(18:1_20:4)	PE(18:1_20:4)	5.68	5.69354	764.524	303.233	1.99422e+07	-0.013538
152	PE(18:1_20:5)	PE(18:1_20:5)	5.35	5.35817	762.508	301.217	545526	-0.00816667
153	PE(18:1_22:4)	PE(18:1_22:4)	6.18	5.97303	792.555	331.264	2.32789e+06	0.206967
154	PE(18:1_22:5)	PE(18:1_22:5)	5.82	5.80426	790.539	329.249	1.55901e+06	0.0157448
155	PE(18:1_22:6)	PE(18:1_22:6)	5.48	5.59803	788.524	327.233	3.16366e+06	-0.118026
156	PE(18:2_16:1)	PE(18:2_16:1)	5.44	5.35817	712.492	279.233	9.87491e+06	0.0818333
157	PE(18:2_18:2)	PE(18:2_18:2)	5.55	5.446	738.508	279.233	1.09217e+07	0.104
158	PE(18:2_18:3)	PE(18:2_18:3)	5.23	5.18248	736.492	277.217	388836	0.0475167
159	PE(18:2_20:1)	PE(18:2_20:1)	6.4	6.14872	768.555	309.28	829055	0.251283
160	PE(18:2_20:2)	PE(18:2_20:2)	6.03	5.79737	766.539	307.264	883055	0.232633
161	PE(18:2_20:3)	PE(18:2_20:3)	5.68	5.40508	764.524	305.249	1.04555e+06	0.274924
162	PE(18:2_20:4)	PE(18:2_20:4)	5.35	5.35817	762.508	303.233	1.81003e+07	-0.00816667
163	PE(18:2_20:5)	PE(18:2_20:5)	5.04	5.18248	760.492	301.217	11639.1	-0.142483
164	PE(18:2_22:4)	PE(18:2_22:4)	5.82	5.62992	790.539	331.264	304261	0.190084
165	PE(18:2_22:5)	PE(18:2_22:5)	5.48	5.35817	788.524	329.249	1.14616e+06	0.121833
166	PE(18:2_22:6)	PE(18:2_22:6)	5.16	5.27033	786.508	327.233	1.6987e+06	-0.110333
167	PE(O-16:0_16:0)	PE(O-16:0_16:0)	6.01	6.3244	676.529	255.233	906456	-0.3144
168	PE(O-16:0_16:1)	PE(O-16:0_16:1)	5.67	5.8852	674.513	253.217	201527	-0.2152
169	PE(O-16:0_18:0)	PE(O-16:0_18:0)	6.5	6.40084	704.56	283.264	300275	0.0991552
170	PE(O-16:0_18:1)	PE(O-16:0_18:1)	6.13	6.41223	702.544	281.249	1.00162e+07	-0.282233
171	PE(O-16:0_18:2)	PE(O-16:0_18:2)	5.77	5.97303	700.529	279.233	614776	-0.203033
172	PE(O-16:0_18:3)	PE(O-16:0_18:3)	5.44	5.30493	698.513	277.217	22053.5	0.135072
173	PE(O-16:0_20:1)	PE(O-16:0_20:1)	6.65	6.85143	730.576	309.28	8.50324e+06	-0.201433
174	PE(O-16:0_20:2)	PE(O-16:0_20:2)	6.26	6.41223	728.56	307.264	1.49102e+06	-0.152233
175	PE(O-16:0_20:3)	PE(O-16:0_20:3)	5.89	6.09875	726.544	305.249	369371	-0.208751
176	PE(O-16:0_20:4)	PE(O-16:0_20:4)	5.55	5.34164	724.529	303.233	217685	0.208357
177	PE(O-16:0_20:5)	PE(O-16:0_20:5)	5.23	N/A	722.513	301.217	N/A	#VALUE!
178	PE(O-16:0_22:4)	PE(O-16:0_22:4)	6.03	6.25345	752.56	331.264	3.95949e+06	-0.223448
179	PE(O-16:0_22:5)	PE(O-16:0_22:5)	5.68	6.08764	750.544	329.249	1.67054e+06	-0.407636
180	PE(O-16:0_22:6)	PE(O-16:0_22:6)	5.35	5.35817	748.529	327.233	202990	-0.00816667
181	PE(O-18:0_16:0)	PE(O-18:0_16:0)	6.5	6.23655	704.56	255.233	477625	0.26345
182	PE(O-18:0_16:1)	PE(O-18:0_16:1)	6.13	6.41223	702.544	253.217	1.02309e+06	-0.282233
183	PE(O-18:0_18:0)	PE(O-18:0_18:0)	7.05	6.85143	732.591	283.264	630175	0.198567
184	PE(O-18:0_18:1)	PE(O-18:0_18:1)	6.65	6.85143	730.576	281.249	2.08009e+07	-0.201433
185	PE(O-18:0_18:2)	PE(O-18:0_18:2)	6.26	6.50007	728.56	279.233	6.94299e+06	-0.240067
186	PE(O-18:0_18:3)	PE(O-18:0_18:3)	5.89	6.1661	726.544	277.217	94198	-0.276104
187	PE(O-18:0_20:1)	PE(O-18:0_20:1)	7.22	7.37847	758.607	309.28	5.43219e+06	-0.158467
188	PE(O-18:0_20:2)	PE(O-18:0_20:2)	6.8	7.03899	756.591	307.264	606071	-0.238994
189	PE(O-18:0_20:3)	PE(O-18:0_20:3)	6.4	6.64729	754.576	305.249	2.2464e+06	-0.247291
190	PE(O-18:0_20:4)	PE(O-18:0_20:4)	6.03	5.8852	752.56	303.233	2.34104e+06	0.1448
191	PE(O-18:0_20:5)	PE(O-18:0_20:5)	5.68	5.35817	750.544	301.217	14541.2	0.321833
192	PE(O-18:0_22:4)	PE(O-18:0_22:4)	6.55	6.83602	780.591	331.264	1.78688e+07	-0.286017
193	PE(O-18:0_22:5)	PE(O-18:0_22:5)	6.18	6.41223	778.576	329.249	3.27362e+06	-0.232233
194	PE(O-18:0_22:6)	PE(O-18:0_22:6)	5.82	5.74481	776.56	327.233	376141	0.0751892
195	PE(P-14:0_18:0)	PE(P-14:0_18:0)	6.01	5.79737	674.5	283.264	15347.6	0.212633
196	PE(P-14:0_18:1)	PE(P-14:0_18:1)	5.67	5.79737	672.5	281.249	217702	-0.127367
197	PE(P-16:0_16:0)	PE(P-16:0_16:0)	6.01	6.23797	674.5	255.233	4.13965e+06	-0.227973
198	PE(P-16:0_16:1)	PE(P-16:0_16:1)	5.67	5.81338	672.5	253.217	2.16523e+06	-0.143377
199	PE(P-16:0_18:0)	PE(P-16:0_18:0)	6.5	6.3244	702.5	283.264	1.86455e+06	0.1756
200	PE(P-16:0_18:1)	PE(P-16:0_18:1)	6.13	6.3244	700.5	281.249	7.63049e+07	-0.1944
201	PE(P-16:0_18:2)	PE(P-16:0_18:2)	5.77	5.97234	698.5	279.233	6.52059e+06	-0.202343
202	PE(P-16:0_18:3)	PE(P-16:0_18:3)	5.44	5.6529	696.5	277.217	168342	-0.212902
203	PE(P-16:0_20:1)	PE(P-16:0_20:1)	6.65	6.83823	728.6	309.28	1.01122e+08	-0.18823
204	PE(P-16:0_20:2)	PE(P-16:0_20:2)	6.26	6.41223	726.5	307.264	1.77655e+07	-0.152233
205	PE(P-16:0_20:3)	PE(P-16:0_20:3)	5.89	6.06088	724.5	305.249	8.14994e+06	-0.170883
206	PE(P-16:0_20:4)	PE(P-16:0_20:4)	5.55	5.8852	722.5	303.233	3.62737e+07	-0.3352
207	PE(P-16:0_20:5)	PE(P-16:0_20:5)	5.23	5.57896	720.5	301.217	122483	-0.348964
208	PE(P-16:0_22:4)	PE(P-16:0_22:4)	6.03	6.23655	750.5	331.264	2.21964e+07	-0.20655
209	PE(P-16:0_22:5)	PE(P-16:0_22:5)	5.68	5.8852	748.5	329.249	1.13307e+07	-0.2052
210	PE(P-16:0_22:6)	PE(P-16:0_22:6)	5.35	5.72231	746.5	327.233	7.5787e+06	-0.372306
211	PE(P-16:1_18:1)	PE(P-16:1_18:1)	5.77	5.8852	698.5	281.249	247660	-0.1152
212	PE(P-18:0_16:0)	PE(P-18:0_16:0)	6.5	6.37233	702.5	255.233	6.45379e+06	0.12767
213	PE(P-18:0_16:1)	PE(P-18:0_16:1)	6.13	5.8852	700.5	253.217	196007	0.2448
214	PE(P-18:0_18:0)	PE(P-18:0_18:0)	7.05	6.85143	730.6	283.264	1.09053e+07	0.198567
215	PE(P-18:0_18:1)	PE(P-18:0_18:1)	6.65	6.85143	728.6	281.249	2.6151e+08	-0.201433
216	PE(P-18:0_18:2)	PE(P-18:0_18:2)	6.26	6.41223	726.5	279.233	5.62597e+07	-0.152233
217	PE(P-18:0_18:3)	PE(P-18:0_18:3)	5.89	6.1048	724.5	277.217	130823	-0.214797
218	PE(P-18:0_20:1)	PE(P-18:0_20:1)	7.22	7.37847	756.6	309.28	6.96993e+07	-0.158467
219	PE(P-18:0_20:2)	PE(P-18:0_20:2)	6.8	6.96599	754.6	307.264	4.55786e+06	-0.165994
220	PE(P-18:0_20:3)	PE(P-18:0_20:3)	6.4	6.36319	752.6	305.249	3.76866e+06	0.0368054
221	PE(P-18:0_20:4)	PE(P-18:0_20:4)	6.03	5.8852	750.5	303.233	1.74513e+06	0.1448
222	PE(P-18:0_20:5)	PE(P-18:0_20:5)	5.68	5.96497	748.5	301.217	367097	-0.284974
223	PE(P-18:0_22:4)	PE(P-18:0_22:4)	6.55	6.76358	778.6	331.264	8.5748e+07	-0.213583
224	PE(P-18:0_22:5)	PE(P-18:0_22:5)	6.18	6.41223	776.6	329.249	1.19997e+07	-0.232233
225	PE(P-18:0_22:6)	PE(P-18:0_22:6)	6.24	6.23655	774.5	327.233	1.77619e+07	0.00345
226	PE(P-18:1_16:0)	PE(P-18:1_16:0)	6.13	6.3244	700.5	255.233	2.3636e+07	-0.1944
227	PE(P-18:1_16:1)	PE(P-18:1_16:1)	5.77	5.8852	698.5	253.217	2.28156e+06	-0.1152
228	PE(P-18:1_18:0)	PE(P-18:1_18:0)	6.65	6.85143	728.6	283.1	6.40667e+06	-0.201433
229	PE(P-18:1_18:1)	PE(P-18:1_18:1)	6.26	6.36176	726.5	281.249	1.52892e+08	-0.101758
230	PE(P-18:1_18:2)	PE(P-18:1_18:2)	5.89	5.97303	724.5	279.233	3.71209e+06	-0.0830333
231	PE(P-18:1_18:3)	PE(P-18:1_18:3)	5.55	5.70952	722.5	277.217	54801	-0.159517
232	PE(P-18:1_20:1)	PE(P-18:1_20:1)	6.8	6.85143	754.6	309.28	1.48987e+08	-0.0514333
233	PE(P-18:1_20:2)	PE(P-18:1_20:2)	6.4	6.41223	752.6	307.264	1.56857e+07	-0.0122333
234	PE(P-18:1_20:3)	PE(P-18:1_20:3)	6.03	6.05504	750.5	305.249	4.28428e+06	-0.0250351
235	PE(P-18:1_20:4)	PE(P-18:1_20:4)	5.89	5.8852	748.5	303.233	3.66368e+07	0.0048
236	PE(P-18:1_20:5)	PE(P-18:1_20:5)	5.35	5.62168	746.5	301.217	64086.5	-0.271683
237	PE(P-18:1_22:4)	PE(P-18:1_22:4)	6.18	6.23655	776.6	331.264	1.93832e+07	-0.05655
238	PE(P-18:1_22:5)	PE(P-18:1_22:5)	5.82	5.8852	774.5	329.249	2.06338e+06	-0.0652
239	PE(P-18:1_22:6)	PE(P-18:1_22:6)	5.48	5.79737	772.5	327.233	4.21573e+06	-0.317367
240	PE(P-18:2_18:2)	PE(P-18:2_18:2)	5.55	5.62168	722.5	279.233	1.07568e+06	-0.0716833
241	PE(P-18:2_20:4)	PE(P-18:2_20:4)	5.35	5.53385	746.5	303.233	1.34545e+06	-0.18385
242	PE(P-18:2_22:6)	PE(P-18:2_22:6)	5.16	5.446	770.5	327.233	1.43554e+06	-0.286
243	PG(14:0_14:0)	PG(14:0_14:0)	4.56	4.39193	665.44	227.202	35810.8	0.168067
244	PG(14:0_18:1)	PG(14:0_18:1)	4.92	4.7433	719.487	281.249	916864	0.1767
245	PG(14:0_18:2)	PG(14:0_18:2)	4.7	4.56762	717.471	279.233	596807	0.132383
246	PG(14:0_18:3)	PG(14:0_18:3)	4.5	4.7433	715.456	277.217	16297	-0.2433
247	PG(14:0_20:1)	PG(14:0_20:1)	5.23	5.70952	747.518	309.28	80340.5	-0.479517
248	PG(14:0_20:2)	PG(14:0_20:2)	5	4.83113	745.503	307.264	14746.3	0.168867
249	PG(14:0_20:3)	PG(14:0_20:3)	4.78	4.65545	743.487	305.249	13459.5	0.12455
250	PG(14:0_20:4)	PG(14:0_20:4)	4.57	4.47978	741.471	303.233	25268.7	0.0902167
251	PG(14:0_20:5)	PG(14:0_20:5)	4.37	N/A	739.456	301.217	N/A	#VALUE!
252	PG(14:0_22:4)	PG(14:0_22:4)	4.86	N/A	769.503	331.264	N/A	#VALUE!
253	PG(16:0_14:0)	PG(16:0_14:0)	4.84	4.7433	693.471	227.202	9.72e+06	0.0967
254	PG(16:0_16:0)	PG(16:0_16:0)	5.14	5.00682	721.503	255.233	3.9958e+07	0.133183
255	PG(16:0_16:1)	PG(16:0_16:1)	4.92	4.82435	719.487	253.217	8.50643e+06	0.0956463
256	PG(16:0_18:0)	PG(16:0_18:0)	5.47	5.35817	749.534	283.264	1.18471e+07	0.111833
257	PG(16:0_18:1)	PG(16:0_18:1)	5.23	5.03645	747.518	281.249	4.42445e+07	0.19355
258	PG(16:0_18:2)	PG(16:0_18:2)	5	4.86108	745.503	279.233	4.81395e+07	0.138919
259	PG(16:0_18:3)	PG(16:0_18:3)	4.78	4.68439	743.487	277.217	2.81006e+06	0.0956114
260	PG(16:0_20:1)	PG(16:0_20:1)	5.56	5.35817	775.549	309.28	6.53626e+06	0.201833
261	PG(16:0_20:2)	PG(16:0_20:2)	5.32	5.11513	773.534	307.264	4.92715e+06	0.204872
262	PG(16:0_20:3)	PG(16:0_20:3)	5.08	4.89774	771.518	305.249	3.0778e+06	0.182263
263	PG(16:0_20:4)	PG(16:0_20:4)	4.86	4.83113	769.503	303.233	8.86829e+06	0.0288667
264	PG(16:0_20:5)	PG(16:0_20:5)	4.65	4.65545	767.487	301.217	211446	-0.00545
265	PG(16:0_22:4)	PG(16:0_22:4)	5.17	5.00682	797.534	331.264	417389	0.163183
266	PG(16:0_22:5)	PG(16:0_22:5)	4.95	4.83113	795.518	329.249	1.25353e+06	0.118867
267	PG(16:0_22:6)	PG(16:0_22:6)	4.73	4.7433	793.503	327.233	4.62052e+06	-0.0133
268	PG(18:0_14:0)	PG(18:0_14:0)	5.14	5.00682	721.503	227.202	356175	0.133183
269	PG(18:0_16:1)	PG(18:0_16:1)	5.23	5.08011	747.518	253.217	210217	0.149888
270	PG(18:0_18:0)	PG(18:0_18:0)	5.82	6.26913	777.565	283.264	474245	-0.449134
271	PG(18:0_18:1)	PG(18:0_18:1)	5.56	5.35817	775.549	281.249	2.01953e+07	0.201833
272	PG(18:0_18:2)	PG(18:0_18:2)	5.32	5.18248	773.534	279.233	7.29326e+06	0.137517
273	PG(18:0_18:3)	PG(18:0_18:3)	5.08	5.00682	771.518	277.217	60501.4	0.0731833
274	PG(18:0_20:0)	PG(18:0_20:0)	6.19	6.23655	805.596	283.264	117328	-0.04655
275	PG(18:0_20:1)	PG(18:0_20:1)	5.92	5.73339	803.581	309.28	196528	0.186611
276	PG(18:0_20:2)	PG(18:0_20:2)	5.66	5.446	801.565	307.264	1.08887e+06	0.214
277	PG(18:0_20:3)	PG(18:0_20:3)	5.41	5.27033	799.549	305.249	900992	0.139667
278	PG(18:0_20:4)	PG(18:0_20:4)	5.17	5.09465	797.534	303.233	2.89437e+06	0.07535
279	PG(18:0_20:5)	PG(18:0_20:5)	4.95	4.8202	795.518	301.217	78541	0.129802
280	PG(18:0_22:4)	PG(18:0_22:4)	5.51	5.35817	825.565	331.264	735295	0.151833
281	PG(18:0_22:5)	PG(18:0_22:5)	5.26	5.26028	823.549	329.249	138891	-0.000282201
282	PG(18:0_22:6)	PG(18:0_22:6)	5.04	5.00682	821.534	327.233	316110	0.0331833
283	PG(18:1_16:1)	PG(18:1_16:1)	5	4.83113	745.503	281.249	1.95831e+06	0.168867
284	PG(18:1_18:1)	PG(18:1_18:1)	5.32	4.90606	773.534	281.249	2.68414e+07	0.413944
285	PG(18:1_18:2)	PG(18:1_18:2)	4.66	4.65545	771.518	279.233	5.64885e+07	0.00455
286	PG(18:1_18:3)	PG(18:1_18:3)	4.86	4.47978	769.503	277.217	6.452e+06	0.380217
287	PG(18:1_20:1)	PG(18:1_20:1)	5.66	5.18248	801.565	309.28	403151	0.477517
288	PG(18:1_20:2)	PG(18:1_20:2)	5.41	4.91897	799.549	307.264	1.3214e+06	0.491033
289	PG(18:1_20:3)	PG(18:1_20:3)	5.17	4.7433	797.534	305.249	5.3102e+06	0.4267
290	PG(18:1_20:4)	PG(18:1_20:4)	4.95	4.69314	795.518	303.233	3.15402e+06	0.256858
291	PG(18:1_20:5)	PG(18:1_20:5)	4.73	4.46147	793.503	301.217	265141	0.26853
292	PG(18:1_22:4)	PG(18:1_22:4)	5.26	4.83113	823.549	331.264	493395	0.428867
293	PG(18:1_22:5)	PG(18:1_22:5)	5.04	4.7433	821.534	329.249	2.29755e+06	0.2967
294	PG(18:1_22:6)	PG(18:1_22:6)	4.82	4.56762	819.518	327.233	1.99e+06	0.252383
295	PG(18:2_16:1)	PG(18:2_16:1)	4.78	4.59134	743.487	279.233	2.18279e+06	0.188665
296	PG(18:2_18:2)	PG(18:2_18:2)	4.86	4.4795	769.503	279.233	8.57235e+07	0.380496
297	PG(18:2_18:3)	PG(18:2_18:3)	4.25	4.24702	767.487	277.217	2.58931e+06	0.0029846
298	PG(18:2_20:1)	PG(18:2_20:1)	5.41	4.91897	799.549	309.28	432927	0.491033
299	PG(18:2_20:2)	PG(18:2_20:2)	5.17	4.7433	797.534	307.264	2.24329e+06	0.4267
300	PG(18:2_20:3)	PG(18:2_20:3)	4.49	4.48571	795.518	305.249	3.19756e+06	0.00428829
301	PG(18:2_20:4)	PG(18:2_20:4)	4.73	4.39193	793.503	303.233	4.71257e+06	0.338067
302	PG(18:2_20:5)	PG(18:2_20:5)	4.53	4.13866	791.487	301.217	125402	0.391341
303	PG(18:2_22:4)	PG(18:2_22:4)	4.66	4.65545	821.534	331.264	669024	0.00455
304	PG(18:2_22:5)	PG(18:2_22:5)	4.82	4.52531	819.518	329.249	1.74813e+06	0.294695
305	PG(18:2_22:6)	PG(18:2_22:6)	4.61	4.3041	817.503	327.233	5.84285e+06	0.3059
306	PG(20:0_16:1)	PG(20:0_16:1)	5.56	5.73986	775.549	253.217	51021	-0.179863
307	PG(20:0_18:1)	PG(20:0_18:1)	5.92	6.21292	803.581	281.249	247637	-0.292918
308	PG(20:0_18:2)	PG(20:0_18:2)	5.66	5.79737	801.565	279.233	258884	-0.137367
309	PG(20:0_18:3)	PG(20:0_18:3)	5.41	N/A	799.549	277.217	N/A	#VALUE!
310	PG(20:0_20:1)	PG(20:0_20:1)	6.3	6.67575	831.612	309.28	177457	-0.37575
311	PG(20:0_20:2)	PG(20:0_20:2)	6.02	N/A	829.596	307.264	N/A	#VALUE!
312	PG(20:0_20:3)	PG(20:0_20:3)	5.76	5.35817	827.581	305.249	63749.5	0.401833
313	PG(20:0_20:4)	PG(20:0_20:4)	5.51	5.2857	825.565	303.233	217892	0.224299
314	PG(20:0_20:5)	PG(20:0_20:5)	5.26	N/A	823.549	301.217	N/A	#VALUE!
315	PG(20:0_22:4)	PG(20:0_22:4)	5.86	6.10516	853.596	331.264	28959.9	-0.245162
316	PG(20:0_22:5)	PG(20:0_22:5)	5.6	5.79737	851.581	329.249	53706.5	-0.197367
317	PG(20:0_22:6)	PG(20:0_22:6)	5.36	5.28677	849.565	327.233	89344.5	0.0732301
318	PI(14:0_14:0)	PI(14:0_14:0)	4.49	4.04058	753.456	227.202	7980.93	0.449417
319	PI(14:0_18:1)	PI(14:0_18:1)	4.87	4.7433	807.503	281.249	83324.4	0.1267
320	PI(14:0_18:2)	PI(14:0_18:2)	4.66	4.83113	805.487	279.233	33990.9	-0.171133
321	PI(14:0_18:3)	PI(14:0_18:3)	4.46	N/A	803.472	277.217	N/A	#VALUE!
322	PI(14:0_20:1)	PI(14:0_20:1)	5.18	5.00682	835.534	309.28	15091.5	0.173183
323	PI(14:0_20:2)	PI(14:0_20:2)	4.96	N/A	833.518	307.264	N/A	#VALUE!
324	PI(14:0_20:3)	PI(14:0_20:3)	4.74	N/A	831.503	305.249	N/A	#VALUE!
325	PI(14:0_20:4)	PI(14:0_20:4)	4.54	N/A	829.487	303.233	N/A	#VALUE!
326	PI(14:0_20:5)	PI(14:0_20:5)	4.34	N/A	827.472	301.217	N/A	#VALUE!
327	PI(14:0_22:4)	PI(14:0_22:4)	4.83	N/A	857.518	331.264	N/A	#VALUE!
328	PI(14:0_22:5)	PI(14:0_22:5)	4.62	N/A	855.503	329.249	N/A	#VALUE!
329	PI(14:0_22:6)	PI(14:0_22:6)	4.42	N/A	853.487	327.233	N/A	#VALUE!
330	PI(16:0_14:0)	PI(16:0_14:0)	4.78	4.7433	781.487	227.202	36690.4	0.0367
331	PI(16:0_16:0)	PI(16:0_16:0)	5.09	4.99935	809.518	255.233	3.68773e+06	0.0906523
332	PI(16:0_16:1)	PI(16:0_16:1)	4.87	4.7433	807.503	253.217	644700	0.1267
333	PI(16:0_18:0)	PI(16:0_18:0)	5.42	5.35817	837.55	283.264	1.23269e+07	0.0618333
334	PI(16:0_18:1)	PI(16:0_18:1)	5.18	5.00682	835.534	281.249	2.41926e+06	0.173183
335	PI(16:0_18:2)	PI(16:0_18:2)	4.96	4.83113	833.518	279.233	3.67232e+06	0.128867
336	PI(16:0_20:1)	PI(16:0_20:1)	5.52	5.35817	863.565	309.28	358301	0.161833
337	PI(16:0_20:2)	PI(16:0_20:2)	5.28	4.91897	861.55	307.264	81401.3	0.361033
338	PI(16:0_20:3)	PI(16:0_20:3)	5.05	4.91897	859.534	305.249	2.18176e+06	0.131033
339	PI(16:0_20:4)	PI(16:0_20:4)	4.83	4.7433	857.518	303.233	1.6128e+07	0.0867
340	PI(16:0_20:5)	PI(16:0_20:5)	4.62	4.56762	855.503	301.217	177198	0.0523833
341	PI(16:0_22:4)	PI(16:0_22:4)	5.13	5.00682	885.55	331.264	181294	0.123183
342	PI(16:0_22:5)	PI(16:0_22:5)	4.91	4.87537	883.534	329.249	563802	0.0346299
343	PI(16:0_22:6)	PI(16:0_22:6)	4.7	4.7433	881.518	327.233	1.61755e+06	-0.0433
344	PI(18:0_14:0)	PI(18:0_14:0)	5.09	5.00682	809.518	227.202	19716.6	0.0831833
345	PI(18:0_16:1)	PI(18:0_16:1)	5.18	5.00682	835.534	253.217	252545	0.173183
346	PI(18:0_18:0)	PI(18:0_18:0)	5.77	5.446	865.581	283.264	6.32767e+06	0.324
347	PI(18:0_18:1)	PI(18:0_18:1)	5.52	5.35817	863.565	281.249	1.49786e+07	0.161833
348	PI(18:0_18:2)	PI(18:0_18:2)	5.28	5.09465	861.55	279.233	5.05638e+06	0.18535
349	PI(18:0_18:3)	PI(18:0_18:3)	5.05	4.93094	859.534	277.217	136200	0.119061
350	PI(18:0_20:0)	PI(18:0_20:0)	6.13	5.8852	893.612	283.264	1.80448e+06	0.2448
351	PI(18:0_20:1)	PI(18:0_20:1)	5.87	5.70952	891.597	309.28	91436.9	0.160483
352	PI(18:0_20:2)	PI(18:0_20:2)	5.61	5.31546	889.581	307.264	702378	0.29454
353	PI(18:0_20:3)	PI(18:0_20:3)	5.37	5.18248	887.565	305.249	1.20808e+07	0.187517
354	PI(18:0_20:4)	PI(18:0_20:4)	5.13	5.09465	885.55	303.233	3.01554e+07	0.03535
355	PI(18:0_20:5)	PI(18:0_20:5)	4.91	4.91897	883.534	301.217	228527	-0.00896667
356	PI(18:0_22:4)	PI(18:0_22:4)	5.46	5.35817	913.581	331.264	1.74899e+06	0.101833
357	PI(18:0_22:5)	PI(18:0_22:5)	5.23	5.14508	911.565	329.249	758006	0.0849226
358	PI(18:0_22:6)	PI(18:0_22:6)	5	5.00682	909.55	327.233	1.64398e+06	-0.00681667
359	PI(18:1_16:1)	PI(18:1_16:1)	4.96	4.7433	833.518	281.249	3.47041e+06	0.2167
360	PI(18:1_18:1)	PI(18:1_18:1)	5.28	5.00682	861.55	281.249	703631	0.273183
361	PI(18:1_18:2)	PI(18:1_18:2)	5.05	4.83113	859.534	279.233	1.66314e+06	0.218867
362	PI(18:1_18:3)	PI(18:1_18:3)	4.83	4.67779	857.518	277.217	103644	0.152212
363	PI(18:1_20:1)	PI(18:1_20:1)	5.61	5.35817	889.581	309.28	386094	0.251833
364	PI(18:1_20:2)	PI(18:1_20:2)	5.37	5.09465	887.565	307.264	61591.7	0.27535
365	PI(18:1_20:3)	PI(18:1_20:3)	5.13	4.91897	885.55	305.249	715252	0.211033
366	PI(18:1_20:4)	PI(18:1_20:4)	4.91	4.83113	883.534	303.233	4.46437e+06	0.0788667
367	PI(18:1_20:5)	PI(18:1_20:5)	4.7	4.65545	881.518	301.217	30720.9	0.04455
368	PI(18:1_22:4)	PI(18:1_22:4)	5.23	5.00682	911.565	331.264	56368.3	0.223183
369	PI(18:1_22:5)	PI(18:1_22:5)	5	4.86703	909.55	329.249	66767.6	0.132973
370	PI(18:1_22:6)	PI(18:1_22:6)	4.78	4.7433	907.534	327.233	205860	0.0367
371	PI(18:2_16:1)	PI(18:2_16:1)	4.74	4.56762	831.503	279.233	187969	0.172383
372	PI(18:2_18:2)	PI(18:2_18:2)	4.83	4.65545	857.518	279.233	285662	0.17455
373	PI(18:2_18:3)	PI(18:2_18:3)	4.62	4.2457	855.503	277.217	154823	0.374297
374	PI(18:2_20:1)	PI(18:2_20:1)	5.37	5.12275	887.565	309.28	34038.1	0.247249
375	PI(18:2_20:2)	PI(18:2_20:2)	5.13	4.91897	885.55	307.264	17069.1	0.211033
376	PI(18:2_20:3)	PI(18:2_20:3)	4.91	4.7433	883.534	305.249	66458.2	0.1667
377	PI(18:2_20:4)	PI(18:2_20:4)	4.7	4.56762	881.518	303.233	531876	0.132383
378	PI(18:2_20:5)	PI(18:2_20:5)	4.5	N/A	879.503	301.217	N/A	#VALUE!
379	PI(18:2_22:4)	PI(18:2_22:4)	5	N/A	909.55	331.264	N/A	#VALUE!
380	PI(18:2_22:5)	PI(18:2_22:5)	4.78	N/A	907.534	329.249	N/A	#VALUE!
381	PI(18:2_22:6)	PI(18:2_22:6)	4.58	4.56918	905.518	327.233	25610.7	0.0108211
382	PI(20:0_16:1)	PI(20:0_16:1)	5.1	5.10119	863.565	253.217	223013	-0.00119137
383	PI(20:0_18:1)	PI(20:0_18:1)	5.87	5.446	891.597	281.249	701997	0.424
384	PI(20:0_18:2)	PI(20:0_18:2)	5.61	5.18248	889.581	279.233	1.70499e+06	0.427517
385	PI(20:0_18:3)	PI(20:0_18:3)	5.37	4.91897	887.565	277.217	57009.7	0.451033
386	PI(20:0_20:1)	PI(20:0_20:1)	6.24	5.8852	919.628	309.28	17833.7	0.3548
387	PI(20:0_20:2)	PI(20:0_20:2)	5.97	5.53385	917.612	307.264	14566.5	0.43615
388	PI(20:0_20:3)	PI(20:0_20:3)	5.71	5.29133	915.597	305.249	149929	0.418665
389	PI(20:0_20:4)	PI(20:0_20:4)	5.46	5.35817	913.581	303.233	981121	0.101833
390	PI(20:0_20:5)	PI(20:0_20:5)	5.23	4.91897	911.565	301.217	10324	0.311033
391	PI(20:0_22:5)	PI(20:0_22:5)	5.55	5.30607	939.597	329.249	25989.9	0.243925
392	PI(20:0_22:6)	PI(20:0_22:6)	5.31	5.35817	937.581	327.233	36254.7	-0.0481667
393	PS(14:0_14:0)	PS(14:0_14:0)	4.56	N/A	678.435	227.202	N/A	#VALUE!
394	PS(14:0_18:1)	PS(14:0_18:1)	4.92	5.30918	732.482	281.249	55158.3	-0.389184
395	PS(14:0_18:2)	PS(14:0_18:2)	4.7	4.63025	730.466	279.233	37418.6	0.0697538
396	PS(14:0_18:3)	PS(14:0_18:3)	4.5	N/A	728.451	277.217	N/A	#VALUE!
397	PS(14:0_20:1)	PS(14:0_20:1)	5.23	N/A	760.513	309.28	N/A	#VALUE!
398	PS(14:0_20:2)	PS(14:0_20:2)	5	N/A	758.498	307.264	N/A	#VALUE!
399	PS(14:0_20:3)	PS(14:0_20:3)	4.78	N/A	756.482	305.249	N/A	#VALUE!
400	PS(14:0_20:4)	PS(14:0_20:4)	4.57	N/A	754.466	303.233	N/A	#VALUE!
401	PS(14:0_20:5)	PS(14:0_20:5)	4.37	N/A	752.451	301.217	N/A	#VALUE!
402	PS(14:0_22:4)	PS(14:0_22:4)	4.86	5.23559	782.498	331.264	14400.6	-0.375591
403	PS(14:0_22:5)	PS(14:0_22:5)	4.65	4.65545	780.482	329.249	13372.8	-0.00545
404	PS(14:0_22:6)	PS(14:0_22:6)	4.45	N/A	778.466	327.233	N/A	#VALUE!
405	PS(16:0_14:0)	PS(16:0_14:0)	4.84	4.7433	706.466	227.202	10083	0.0967
406	PS(16:0_16:0)	PS(16:0_16:0)	5.14	5.00682	734.498	255.233	439901	0.133183
407	PS(16:0_16:1)	PS(16:0_16:1)	4.92	4.7433	732.482	253.217	158808	0.1767
408	PS(16:0_18:0)	PS(16:0_18:0)	5.14	5.14002	760.513	283.264	1.58406e+06	-1.63145e-05
409	PS(16:0_18:1)	PS(16:0_18:1)	5.23	5.00682	760.513	281.249	2.38177e+06	0.223183
410	PS(16:0_18:2)	PS(16:0_18:2)	5	4.83113	758.498	279.233	803140	0.168867
411	PS(16:0_18:3)	PS(16:0_18:3)	4.78	4.64545	756.482	277.217	75183.2	0.134549
412	PS(16:0_20:1)	PS(16:0_20:1)	5.56	5.35817	788.545	309.28	663785	0.201833
413	PS(16:0_20:2)	PS(16:0_20:2)	5.32	5.14345	786.529	307.264	45502.5	0.176546
414	PS(16:0_20:3)	PS(16:0_20:3)	5.08	4.91897	784.513	305.249	343010	0.161033
415	PS(16:0_20:4)	PS(16:0_20:4)	4.86	4.83113	782.498	303.233	1.06764e+06	0.0288667
416	PS(16:0_20:5)	PS(16:0_20:5)	4.65	4.62986	780.482	301.217	76982.2	0.020141
417	PS(16:0_22:4)	PS(16:0_22:4)	5.17	5.00682	810.529	331.264	83288.3	0.163183
418	PS(16:0_22:5)	PS(16:0_22:5)	4.95	4.91897	808.513	329.249	532027	0.0310333
419	PS(16:0_22:6)	PS(16:0_22:6)	4.73	4.7433	806.498	327.233	1.32848e+06	-0.0133
420	PS(18:0_14:0)	PS(18:0_14:0)	5.14	5.1693	734.498	227.202	83934.8	-0.0293031
421	PS(18:0_16:1)	PS(18:0_16:1)	5.23	5.18248	760.513	253.217	2.345e+06	0.0475167
422	PS(18:0_18:0)	PS(18:0_18:0)	5.82	5.97303	790.56	283.264	1.37499e+08	-0.153033
423	PS(18:0_18:1)	PS(18:0_18:1)	5.56	5.35817	788.545	281.249	1.21563e+08	0.201833
424	PS(18:0_18:2)	PS(18:0_18:2)	5.32	5.2532	786.529	279.233	1.19563e+07	0.0668008
425	PS(18:0_18:3)	PS(18:0_18:3)	5.08	5.00682	784.513	277.217	141892	0.0731833
426	PS(18:0_20:0)	PS(18:0_20:0)	6.19	5.86608	818.592	283.264	1.49563e+06	0.323918
427	PS(18:0_20:1)	PS(18:0_20:1)	5.97	5.97303	816.576	309.28	1.40223e+06	-0.00303333
428	PS(18:0_20:2)	PS(18:0_20:2)	5.66	5.47033	814.56	307.264	1.8671e+06	0.189668
429	PS(18:0_20:3)	PS(18:0_20:3)	5.41	5.27033	812.545	305.249	7.93385e+06	0.139667
430	PS(18:0_20:4)	PS(18:0_20:4)	5.17	5.09949	810.529	303.233	9.00554e+06	0.0705084
431	PS(18:0_20:5)	PS(18:0_20:5)	4.95	4.91897	808.513	301.217	239054	0.0310333
432	PS(18:0_22:4)	PS(18:0_22:4)	5.51	5.35817	838.56	331.264	2.60159e+07	0.151833
433	PS(18:0_22:5)	PS(18:0_22:5)	5.26	5.27033	836.545	329.249	3.64499e+06	-0.0103333
434	PS(18:0_22:6)	PS(18:0_22:6)	5.04	5.00682	834.529	327.233	1.33852e+07	0.0331833
435	PS(18:1_16:1)	PS(18:1_16:1)	5	4.80921	758.498	281.249	276947	0.190795
436	PS(18:1_18:1)	PS(18:1_18:1)	5.32	5.09465	786.529	281.249	1.16835e+07	0.22535
437	PS(18:1_18:2)	PS(18:1_18:2)	5.08	4.91897	784.513	279.233	583713	0.161033
438	PS(18:1_18:3)	PS(18:1_18:3)	4.86	4.73257	782.498	277.217	32916.8	0.127435
439	PS(18:1_20:1)	PS(18:1_20:1)	5.66	5.35817	814.56	309.28	6.11823e+06	0.301833
440	PS(18:1_20:2)	PS(18:1_20:2)	5.41	5.18248	812.545	307.264	460184	0.227517
441	PS(18:1_20:3)	PS(18:1_20:3)	5.17	4.91897	810.529	305.249	291380	0.251033
442	PS(18:1_20:4)	PS(18:1_20:4)	4.95	4.83113	808.513	303.233	618833	0.118867
443	PS(18:1_20:5)	PS(18:1_20:5)	4.73	4.96332	806.498	301.217	14604.6	-0.233322
444	PS(18:1_22:4)	PS(18:1_22:4)	5.26	5.00682	836.545	331.264	195892	0.253183
445	PS(18:1_22:5)	PS(18:1_22:5)	5.04	4.87241	834.529	329.249	140485	0.167585
446	PS(18:1_22:6)	PS(18:1_22:6)	4.82	4.7433	832.513	327.233	800678	0.0767
447	PS(18:2_16:1)	PS(18:2_16:1)	4.78	4.47978	756.482	279.233	68740.8	0.300217
448	PS(18:2_18:2)	PS(18:2_18:2)	4.86	4.65545	782.498	279.233	195166	0.20455
449	PS(18:2_18:3)	PS(18:2_18:3)	4.65	4.47978	780.482	277.217	17133.6	0.170217
450	PS(18:2_20:1)	PS(18:2_20:1)	5.41	5.18248	812.545	309.28	83560.7	0.227517
451	PS(18:2_20:2)	PS(18:2_20:2)	5.17	4.91897	810.529	307.264	72507.1	0.251033
452	PS(18:2_20:3)	PS(18:2_20:3)	4.95	4.7665	808.513	305.249	50706.5	0.1835
453	PS(18:2_20:4)	PS(18:2_20:4)	4.73	4.56762	806.498	303.233	260245	0.162383
454	PS(18:2_20:5)	PS(18:2_20:5)	4.53	N/A	804.482	301.217	N/A	#VALUE!
455	PS(18:2_22:4)	PS(18:2_22:4)	5.04	4.83113	834.529	331.264	51034.2	0.208867
456	PS(18:2_22:5)	PS(18:2_22:5)	4.82	N/A	832.513	329.249	N/A	#VALUE!
457	PS(18:2_22:6)	PS(18:2_22:6)	4.61	4.50433	830.498	327.233	144088	0.105666
458	PS(20:0_16:1)	PS(20:0_16:1)	5.18	5.18248	788.545	253.217	2.36482e+06	-0.00248333
459	PS(20:0_18:2)	PS(20:0_18:2)	5.66	5.27033	814.561	279.234	1.1592e+07	0.389667
460	PS(20:0_18:3)	PS(20:0_18:3)	5.41	5.06735	812.545	277.217	215002	0.342653
461	PS(20:0_20:1)	PS(20:0_20:1)	6.68	6.67575	844.607	309.28	493743	0.00425
462	PS(20:0_20:2)	PS(20:0_20:2)	6.02	N/A	842.592	307.264	N/A	#VALUE!
463	PS(20:0_20:3)	PS(20:0_20:3)	5.36	5.35817	840.576	305.249	741511	0.00183333
464	PS(20:0_20:4)	PS(20:0_20:4)	5.51	5.18248	838.56	303.233	3.79547e+06	0.327517
465	PS(20:0_20:5)	PS(20:0_20:5)	5.26	4.91897	836.545	301.217	35618.9	0.341033
466	PS(20:0_22:4)	PS(20:0_22:4)	5.86	5.60988	866.592	331.264	88267	0.250118
467	PS(20:0_22:5)	PS(20:0_22:5)	5.6	5.25224	864.576	329.249	242752	0.34776
468	PS(20:0_22:6)	PS(20:0_22:6)	5.36	5.35817	862.56	327.233	627368	0.00183333

## Sheet: Table.S6
Table.S6 Phospholipidomics of sorafenib resistant HCC cell lines.
Sample Name	Label	PA(16:0_14:0)	PA(16:0_16:0)	PA(16:0_16:1)	PA(16:0_18:1)	PA(16:0_18:2)	PA(18:0_16:1)	PA(18:0_18:0)	PA(18:0_18:1)	PA(18:0_18:2)	PA(18:0_18:3)	PA(18:0_20:0)	PA(18:0_20:1)	PA(18:0_20:2)	PA(18:0_20:3)	PA(18:0_20:4)	PA(18:0_22:4)	PA(18:0_22:5)	PA(18:0_22:6)	PA(18:1_16:1)	PA(18:1_18:1)	PA(18:1_18:2)	PA(20:0_16:1)	PA(20:0_18:1)	PA(20:0_18:2)	PA(20:0_20:1)	PA(20:0_20:2)	PA(20:0_20:3)	PA(20:0_20:4)	PA(20:0_20:5)	PA(20:0_22:4)	PA(20:0_22:5)	PA(20:0_22:6)	PC(14:0_14:0)+AcO	PC(14:0_18:1)+AcO	PC(14:0_18:2)+AcO	PC(14:0_18:3)+AcO	PC(14:0_20:1)+AcO	PC(14:0_20:2)+AcO	PC(14:0_20:3)+AcO	PC(14:0_20:4)+AcO	PC(14:0_20:5)+AcO	PC(14:0_22:4)+AcO	PC(14:0_22:5)+AcO	PC(14:0_22:6)+AcO	PC(16:0_14:0)+AcO	PC(16:0_16:0)+AcO	PC(16:0_16:1)+AcO	PC(16:0_18:0)+AcO
MHCC97H C1	97H-C	0.00206627	0.00759663	0.00374818	0.00703289	0.000677168	0.0303483	0.00303803	0.126171	0.0211348	0.00301904	0.00353324	0.0622901	0.0267743	0.0679822	0.470262	0.263301	0.188672	0.0172783	0.00281112	0.0103913	0.000852976	0.0180727	0.147528	0.0403431	0.134149	0.0131137	0.0609895	0.666649	0.0328214	0.129229	0.111966	0.0101546	0.0609684	0.276019	0.0431906	0.00299447	0.00296024	0.00263694	0.0183008	0.142721	0.0282871	0.00841402	0.0164302	0.00669377	0.516902	1.09829	1.42191	0.237566
MHCC97H C2	97H-C		0.0166362	0.00698688	0.0106492		0.027202	0.00210017	0.10914	0.0128563	0.00437329	0.00468322	0.0531795	0.0179525	0.0571024	0.441557	0.242409	0.12977	0.0211854	0.00168812	0.00913039	0.000412515	0.0109705	0.114331	0.0419734	0.100239	0.0143418	0.0626212	0.562599	0.0223474	0.152256	0.0841855	0.00836714	0.0641781	0.40958	0.0542571	0.00286046	0.00342459	0.00281632	0.0228506	0.0889012	0.0142226	0.00502061	0.0142394	0.00579084	0.79822	1.86233	1.15786	0.186542
MHCC97H C3	97H-C	0.00106055	0.0102567	0.00452399	0.0145873		0.0221748	0.00258464	0.104968	0.0141975	0.00236971	0.00318504	0.0537122	0.0129916	0.0330796	0.271337	0.195944	0.218047	0.0113849		0.0117364	0.000783308	0.0104589	0.126409	0.0184619	0.0818498	0.00896912	0.0333484	0.324383	0.0289755	0.0902248	0.0644991	0.00554152	0.0428404	0.2015	0.0361063	0.000841704	0.00153344	0.0025961	0.0198074	0.126703	0.0162605	0.00585468	0.0198732	0.00421442	0.597534	0.983392	1.03696	0.29353
MHCC97H C4	97H-C		0.0232137	0.00505205	0.0105121		0.0230746	0.00286622	0.100923	0.0132773	0.00181373	0.00262886	0.0406198	0.0145726	0.0412583	0.344649	0.205844	0.162257	0.0303404	0.00198595	0.0119582	0.000589977	0.00884905	0.107178	0.0207862	0.100926	0.0139409	0.0484334	0.542608	0.0216134	0.117251	0.0776182	0.0126204	0.063743	0.303586	0.0558875	0.002709	0.00190043	0.00260986	0.026525	0.153309	0.019484	0.0100159	0.0213218	0.00476167	0.792995	1.94032	1.10708	0.247437
MHCC97H C5	97H-C		0.0252941	0.00469706	0.0154323	0.00105617	0.0304675	0.0034175	0.140156	0.012593	0.00261517	0.00254929	0.0576211	0.0201085	0.0613588	0.616885	0.179593	0.145382	0.0219601	0.0025946	0.0131834	0.00114928	0.0139209	0.143742	0.0355672	0.0834994	0.0150088	0.0710012	0.512914	0.0206529	0.0941606	0.0746132	0.00380234	0.0703476	0.353771	0.0572797	0.00270884	0.00218786	0.00304868	0.0314699	0.12589	0.0222568	0.00585656	0.0159927	0.00207489	0.808281	1.66013	1.51783	0.303523
MHCC97H C6	97H-C	0.00287821	0.0135514	0.00731718	0.0098552	0.000583518	0.0186871	0.00111319	0.0669302	0.00794618	0.00298223	0.00176535	0.0328034	0.0156079	0.0400753	0.390341	0.143784	0.105094	0.00687215	0.00260978	0.0104672	0.00027344	0.00821225	0.0659207	0.0211774	0.0509429	0.00633218	0.0570236	0.413068	0.0194367	0.0906387	0.0655303	0.00226218	0.053842	0.321438	0.0541198	0.0036897	0.00331917	0.00289405	0.0282014	0.168983	0.0162058	0.00552595	0.0166948	0.00540887	0.548377	1.58674	1.30051	0.22936
MHCC97H DR1	97H-R	0.0058944	0.172064	0.0181784	0.0352306	0.000694637	0.0689425	0.00819324	0.352702	0.0235391	0.00684488	0.0097281	0.101792	0.0373856	0.106521	0.466491	0.104309	0.126479	0.0203845	0.0189392	0.027351	0.000795174	0.0295625	0.311062	0.0545341	0.130682	0.0226615	0.128193	0.36287	0.0212668	0.0791371	0.0699493	0.00813369	0.0345153	0.161649	0.015214	0.00109238	0.00124432		0.0103661	0.0448584	0.00462133	0.00358721	0.00696834	0.00177455	0.476663	0.698849	1.43923	0.0898385
MHCC97H DR2	97H-R	0.0161575	0.511774	0.0527888	0.0848068	0.00184562	0.0438848	0.00529814	0.232176	0.0157837	0.0030497	0.00387884	0.0598803	0.0152345	0.0547365	0.209667	0.066283	0.0920874	0.0082924	0.0302147	0.0448694	0.000942471	0.0212159	0.190294	0.0321783	0.0523491	0.0123863	0.0603961	0.225977	0.0167045	0.0419561	0.0481624	0.00290665	0.0291658	0.243997	0.0157945	0.0011376	0.00176502		0.0101143	0.0262373	0.0056383	0.00206701	0.0042924	0.00235323	0.452127	1.12021	1.79089	0.109907
MHCC97H DR3	97H-R	0.00809223	0.204096	0.0258384	0.0324812	0.000633711	0.0529726	0.00498539	0.165422	0.0112612	0.0040693	0.00409215	0.0539864	0.019983	0.0697572	0.362169	0.0804324	0.0819399	0.0227606	0.0150728	0.0274698	0.000870125	0.0199573	0.130455	0.0366347	0.0650861	0.0149623	0.0638639	0.213231	0.0158722	0.0280551	0.0555305	0.00665833	0.0260002	0.189458	0.0127844	0.00149577	0.0012971		0.00687936	0.022882	0.00307193	0.00317787	0.00598553		0.286303	0.936824	1.62631	0.0444797
MHCC97H DR4	97H-R	0.0127182	0.430957	0.047297	0.0830233	0.00177894	0.058822	0.00723592	0.259068	0.0235388	0.00366486	0.00510648	0.0687593	0.0342176	0.0917887	0.376784	0.10065	0.141485	0.0117988	0.0356711	0.0504285	0.00169757	0.0221146	0.332745	0.0738927	0.0907356	0.0170546	0.102323	0.281763	0.012271	0.0487987	0.053258	0.00857166	0.0414231	0.196332	0.0111306	0.000995675	0.00202049	0.0011688	0.0155927	0.0389963	0.00581425	0.00155373	0.00844976		0.367733	0.685751	2.04967	0.0945495
MHCC97H DR5	97H-R	0.0121692	0.518533	0.0462276	0.0983778	0.00314505	0.0687629	0.00762964	0.391237	0.025029	0.00663128	0.00477108	0.066671	0.0343838	0.0958344	0.462094	0.095386	0.126759	0.0155455	0.0390661	0.054669	0.00140387	0.0231777	0.28041	0.0451962	0.0995423	0.0210412	0.081815	0.252578	0.0137485	0.0594048	0.0556732	0.00562667	0.0500561	0.26858	0.0206066	0.00171859	0.00162779	0.00139414	0.0124392	0.0376257	0.00797956	0.00370604	0.011617	0.00243669	0.377501	0.970279	2.52846	0.145118
MHCC97H DR6	97H-R	0.0101543	0.351289	0.0397785	0.0638181	0.0015601	0.0775807	0.00830201	0.28932	0.0281123	0.00396436	0.0064548	0.0912768	0.0240153	0.0767788	0.354177	0.0897257	0.109639	0.0136604	0.0310166	0.0455294	0.00101704	0.019771	0.2167	0.0450703	0.0862964	0.0185309	0.0739673	0.303667	0.01259	0.0505364	0.0636717	0.00769376	0.0417712	0.256822	0.016051	0.00105521	0.00165236	0.000693015	0.0113424	0.0423697	0.00604108	0.00364354	0.0072828	0.00280311	0.408835	1.00425	2.41632	0.0939765
Hep3B C1	Hep 3B-C	0.136005	0.868149	0.0706163	0.252203	0.0111793	0.226545	0.018493	0.946023	0.0712775	0.0158876	0.0147856	0.275743	0.130496	0.227759	0.978847	0.213009	0.212426	0.105231	0.0984382	0.258452	0.00424538	0.0345852	0.612198	0.075888	0.11743	0.024857	0.0942754	0.208125	0.0100772	0.104471	0.0756649	0.0177789	0.133893	0.118305	0.0269766	0.00268008	0.00311409	0.00333298	0.0322488	0.0307528	0.00605579	0.00341417	0.0138141	0.00540164	0.56021	0.526437	1.71747	0.11294
Hep3B C2	Hep 3B-C	0.272871	2.59694	0.13774	0.456553	0.0138312	0.290316	0.0207423	0.919393	0.0874625	0.0228392	0.0150682	0.273292	0.19828	0.287317	1.23841	0.519381	0.408668	0.141502	0.119274	0.288998	0.00502926	0.0443205	0.684179	0.117492	0.188615	0.046679	0.182333	0.407014	0.0179621	0.196937	0.133973	0.0264411	0.183301	0.159758	0.0370757	0.00464128	0.00297751	0.00482887	0.0378726	0.0400726	0.00711475	0.00734108	0.0275898	0.00635818	0.827444	0.898651	2.65202	0.208118
Hep3B C3	Hep 3B-C	0.266334	3.58565	0.112365	0.684772	0.0162826	0.279046	0.030429	1.50445	0.116259	0.0142317	0.0132408	0.342052	0.17946	0.284139	0.880661	0.351096	0.336109	0.086902	0.153816	0.361034	0.00753164	0.0703489	0.927278	0.124945	0.129155	0.0303992	0.131251	0.299979	0.0108988	0.113056	0.109259	0.0275481	0.216423	0.183499	0.0395008	0.00487862	0.00459465	0.00477425	0.0287094	0.0336052	0.0076115	0.00812487	0.0199164	0.00404858	0.848955	1.11765	3.04464	0.216303
Hep3B C4	Hep 3B-C	0.242173	2.2955	0.1142	0.506491	0.010589	0.489207	0.0316126	1.5644	0.132929	0.0335255	0.0249339	0.432104	0.261034	0.389161	1.34053	0.400233	0.522756	0.146882	0.130351	0.299569	0.00863063	0.0617761	0.988212	0.186168	0.184057	0.0394706	0.166924	0.388132	0.0144169	0.121162	0.157366	0.0420055	0.170586	0.0140797	0.0318549	0.0046866	0.00794069	0.00460906	0.0454096	0.0493759	0.00905698	0.00427709	0.0170484	0.00382005	0.859658	1.05014	3.57436	0.227703
Hep3B C5	Hep 3B-C	0.39223	3.11335	0.151206	0.371906	0.0124157	0.306543	0.0348094	1.31031	0.0994974	0.0245686	0.0184572	0.454635	0.233495	0.427081	1.33894	0.553294	0.345714	0.131381	0.138431	0.249043	0.00788254	0.0561687	1.2207	0.116186	0.137489	0.036975	0.197704	0.339558	0.0189747	0.153495	0.122709	0.0500307	0.148228	0.0232131	0.0416571	0.00595788	0.00577814	0.00335584	0.0514137	0.027932	0.00844765	0.0047861	0.0159017	0.00384903	0.579017	1.50116	2.51111	0.222389
Hep3B C6	Hep 3B-C	0.372255	3.06099	0.129785	0.3926	0.0143532	0.355361	0.0264665	1.09924	0.0767633	0.0176714	0.0287958	0.6812	0.158088	0.317622	1.05677	0.641822	0.417089	0.169496	0.134639	0.243608	0.00799763	0.0544341	1.0853	0.127784	0.181943	0.0539537	0.141492	0.406569	0.0144727	0.182253	0.137784	0.0420725	0.125415	0.0169966	0.0343569	0.00337754	0.00620158	0.00296543	0.0440125	0.0330306	0.0121648	0.00604374	0.0211415	0.00690211	0.547043	1.24483	2.59239	0.199065
Hep3B DR1	Hep 3B-R	0.00335788	0.0336877	0.00938471	0.0135299	0.000690368	0.06844	0.00586626	0.300231	0.0160236	0.00298101	0.00199636	0.0327314	0.0153777	0.0540568	0.439846	0.0591266	0.112132	0.035882	0.00853079	0.0157049	0.00067289	0.0089263	0.105976	0.0197502	0.0297577	0.00602853	0.0284087	0.137338	0.00387934	0.0191994	0.0261146	0.00559365	0.0346613	0.129019	0.0151599	0.000830307	0.00270792	0.00121317	0.00455324	0.0127326	0.00109982	0.00160475	0.00218203	0.00178469	0.409971	0.554949	1.12161	0.0779651
Hep3B DR2	Hep 3B-R	0.00492045	0.0301552	0.0122934	0.0256352	0.00079981	0.0829378	0.00625183	0.316322	0.0302428	0.0057283	0.00262211	0.0383887	0.0328288	0.0932144	0.471429	0.0850439	0.148293	0.0240714	0.0156932	0.0264726	0.00207108	0.0122815	0.141803	0.0338881	0.0255713	0.00599854	0.0401149	0.154812	0.0042481	0.0226476	0.0357141	0.00550854	0.0465432	0.202588	0.0199188	0.0015591	0.00439272	0.00168247	0.0106597	0.0161021	0.00238837	0.00302797	0.00500351	0.00137328	0.433886	0.799226	1.57703	0.0890485
Hep3B DR3	Hep 3B-R	0.00149134	0.0151647	0.00760451	0.0093924	0.000434211	0.0597771	0.00525244	0.245729	0.0176132	0.00366624	0.00227988	0.0248694	0.0292134	0.0828674	0.437722	0.104858	0.137653	0.0233593	0.00700451	0.0163913	0.000460999	0.00767707	0.0888207	0.0275105	0.0271189	0.0095594	0.0304705	0.124243	0.00401286	0.0219002	0.0272411	0.00463313	0.0299055	0.102043	0.0136218	0.000481317	0.00311301	0.0012594	0.00768929	0.0155271	0.0019926	0.00254148	0.00438766	0.00130703	0.329422	0.400976	1.41302	0.0482107
Hep3B DR4	Hep 3B-R	0.00484873	0.0359847	0.0222563	0.0214915	0.00143191	0.0955335	0.0107508	0.427356	0.0288079	0.00638897	0.00500007	0.0538129	0.0314679	0.100842	0.611408	0.140258	0.261192	0.0353892	0.0179502	0.0441072	0.00196143	0.0162916	0.175728	0.0389281	0.0494457	0.0123771	0.0514175	0.328706	0.00847564	0.0402804	0.0564932	0.00542277	0.0651614	0.20817	0.0288395	0.00121125	0.00447779	0.00139096	0.0151446	0.0200239	0.00888623	0.00461678	0.0092444		0.488046	1.10526	1.90069	0.123709
Hep3B DR5	Hep 3B-R	0.00373396	0.0257614	0.012388	0.0211012	0.0013492	0.0932633	0.00629484	0.285878	0.0179404	0.00604311	0.00227962	0.0256542	0.0335262	0.0719937	0.487796	0.0730388	0.155139	0.0236109	0.0135381	0.0339406	0.00135957	0.00979453	0.106209	0.0303281	0.0325238	0.00572739	0.0379287	0.168134	0.00463187	0.0219794	0.0412335	0.00458648	0.0364452	0.188207	0.0213468	0.000845359	0.00349367	0.00222801	0.0105923	0.0176809	0.002491	0.00260564	0.00987879		0.419908	0.789921	2.06981	0.0794134
Hep3B DR6	Hep 3B-R	0.00382714	0.0214518	0.0107532	0.0164329	0.00100691	0.0780684	0.00694502	0.3503	0.0205322	0.00494346	0.00284415	0.031385	0.0212118	0.0729542	0.513746	0.077642	0.138839	0.0257723	0.0156491	0.0245714	0.000698444	0.0117537	0.148769	0.0263731	0.0232331	0.00622636	0.0353198	0.13469	0.00395715	0.0156415	0.0309293	0.00400888	0.0448215	0.182166	0.0194512	0.000786916	0.00279399	0.000723399	0.0108978	0.01596	0.00155652	0.00278737	0.00509727	0.00120133	0.368701	0.602176	1.60716	0.0812831
[truncated: 294 more columns]

## Sheet: Table.S7
Table.S7 Phospholipids with VIP>1 from OPLS-DA analysis of MHCC97H(1) and Hep3B(2).
1	2	1|2
PG(16:0_16:0)	PS(16:0_18:1)	PC(18:0_20:4)+AcO
PG(16:0_16:1)	PE(P-16:0_20:4)	PC(16:0_20:4)+AcO
PC(18:0_20:5)+AcO	PC(18:1_22:4)+AcO	PC(18:1_20:4)+AcO
PE(O-18:0_16:0)	PE(18:1_20:3)	PE(O-16:0_22:4)
PC(18:2_20:5)+AcO	PA(16:0_18:2)	PI(18:0_22:6)
PS(18:0_20:5)	PC(18:1_22:5)+AcO	PC(18:2_20:4)+AcO
PC(16:0_22:6)+AcO	PS(14:0_20:4)	PG(18:1_18:1)
PI(18:1_20:2)	PG(18:1_20:3)	PE(18:2_20:2)
PG(18:1_16:1)	PS(18:1_18:1)	PC(18:0_18:0)+AcO
PC(18:2_18:2)+AcO	PS(20:0_18:1)	PA(16:0_16:0)
PE(18:0_18:2)	PC(16:0_18:3)+AcO	PG(16:0_18:0)
PC(18:1_20:1)+AcO	PG(14:0_14:0)	PA(18:0_16:1)
PG(16:0_14:0)	PE(18:1_18:1)	PI(18:0_22:4)
PE(O-16:0_16:0)	PE(18:1_18:2)	PA(18:0_18:1)
PG(18:0_14:0)	PE(18:2_20:1)	PA(18:1_18:1)
PC(16:0_20:5)+AcO	PC(18:0_18:3)+AcO	PE(P-18:2_20:4)
PI(18:1_20:3)	PE(P-16:0_22:5)	PC(18:1_20:5)+AcO
PI(16:0_16:1)	PC(16:0_18:1)+AcO	PI(18:1_16:1)
PG(18:0_20:4)	PG(16:0_18:1)	PE(18:2_18:2)
PC(16:0_20:3)+AcO	PE(18:1_18:3)	PE(P-18:1_16:0)
PE(O-18:0_22:5)	PS(16:0_18:0)	PI(18:0_20:4)
PE(P-18:1_16:1)	PS(20:0_20:2)	PE(18:2_16:1)
PI(20:0_18:2)	PC(18:2_20:1)+AcO	PG(20:0_20:4)
PC(18:0_16:1)+AcO	PE(O-16:0_18:0)	PE(18:2_20:3)
PS(18:1_22:6)	PE(18:1_20:2)	PG(18:1_20:2)
PE(P-16:0_16:0)	PE(P-18:1_20:4)	PE(18:1_16:1)
PC(14:0_20:4)+AcO	PI(18:1_20:4)	PE(18:2_20:4)
PE(P-18:1_18:1)	PC(18:0_20:2)+AcO	PS(16:0_16:1)
PC(14:0_20:5)+AcO	PC(18:1_20:2)+AcO	PA(16:0_18:1)
PI(18:0_16:1)	PE(P-16:0_20:5)	PE(P-18:0_16:0)
PI(18:0_20:3)	PA(20:0_20:1)	PA(18:0_18:0)
PC(16:1_18:2)+AcO	PE(O-18:0_20:3)	PA(16:0_16:1)
PE(P-18:0_18:2)	PG(18:1_22:5)	PC(18:1_16:1)+AcO
PC(18:0_18:2)+AcO	PS(20:0_20:3)	PC(16:0_22:5)+AcO
PG(16:0_22:5)	PE(P-18:1_22:5)	PI(16:0_20:1)
PE(P-18:0_18:1)	PS(20:0_20:5)	PA(20:0_16:1)
PI(18:0_18:1)	PE(18:0_20:5)	PA(18:1_16:1)
PS(18:0_22:5)	PE(O-18:0_16:1)	PG(16:0_22:6)
PC(18:0_20:3)+AcO	PE(P-18:1_20:3)	PC(18:1_20:3)+AcO
PE(P-16:0_18:3)	PS(20:0_18:2)	PE(O-16:0_18:1)
PI(16:0_18:1)	PS(14:0_20:5)	PA(20:0_18:1)
PE(18:2_22:5)	PS(18:0_20:1)	PI(18:1_18:1)
PE(14:0_16:1)	PC(18:1_18:2)+AcO	PC(14:0_18:2)+AcO
PI(18:0_20:5)	PS(14:0_20:3)	PE(16:0_22:5)
PC(18:0_14:0)+AcO	PE(18:1_22:6)	PE(O-18:0_22:4)
PE(P-16:0_16:1)	PS(18:0_16:1)	PS(20:0_16:1)
PG(16:0_20:4)	PA(20:0_22:6)	PS(18:0_18:2)
PI(18:1_18:2)	PI(16:0_18:0)	PS(20:0_20:1)
PC(16:0_18:2)+AcO	PE(P-18:0_20:5)	PE(18:0_20:4)
PE(P-16:0_20:3)	PE(P-18:0_20:4)	PE(P-16:0_18:1)
PC(18:0_22:6)+AcO	PE(P-18:0_22:5)	PE(18:1_20:4)
PE(P-18:0_20:3)	PC(18:0_22:5)+AcO	PS(18:1_20:1)
PI(16:0_20:3)	PG(18:0_18:1)	PE(P-18:1_22:4)
PS(18:0_20:4)	PE(P-18:0_20:1)	PC(18:2_20:2)+AcO
PC(16:0_18:0)+AcO	PC(18:1_22:6)+AcO	PC(18:0_18:1)+AcO
PS(18:0_22:6)	PA(18:0_22:6)	PC(18:0_20:1)+AcO
PC(14:0_22:5)+AcO	PE(P-16:1_18:1)	PC(16:1_18:1)+AcO
PI(18:1_20:5)	PS(16:0_18:2)	PI(18:0_20:0)
PC(18:2_22:5)+AcO	PC(16:0_14:0)+AcO	PC(16:0_16:1)+AcO
PE(18:0_22:5)	PC(14:0_14:0)+AcO	PE(O-18:0_18:1)
PE(P-18:0_22:4)	PE(16:0_20:3)	PG(18:0_16:1)
PI(16:0_22:5)	PS(18:0_18:3)	PC(18:1_18:1)+AcO
PE(16:0_16:0)	PI(16:0_18:3)	PE(P-16:0_18:0)
PI(16:0_20:4)	PC(16:0_22:4)+AcO	PA(18:0_20:3)
PE(P-16:0_18:2)	PE(18:0_18:1)	PI(18:1_22:4)
PE(O-16:0_22:5)	PE(18:1_20:5)	PE(16:0_20:4)
PG(14:0_18:1)	PA(20:0_22:5)	PE(P-16:0_20:2)
PE(P-18:1_20:1)	PC(14:0_18:1)+AcO	PE(18:0_20:3)
PS(18:1_18:2)	PS(18:1_20:3)	PS(14:0_14:0)
PC(14:0_20:3)+AcO	PC(16:0_16:0)+AcO	PA(18:0_22:4)
PE(O-18:0_20:4)	PS(18:0_20:3)	PE(16:0_22:4)
PI(18:1_20:1)	PC(18:0_22:4)+AcO	PE(O-16:0_20:1)
PE(16:0_18:3)		PC(18:2_20:3)+AcO
PI(18:0_20:2)		PE(O-16:0_16:1)
		PE(P-16:0_22:4)
		PA(18:0_20:1)
		PE(18:1_22:5)
		PS(20:0_20:4)
		PA(16:0_14:0)
		PE(P-18:1_20:5)
		PA(20:0_20:2)
		PA(18:0_18:2)
		PS(18:0_18:1)
		PI(20:0_18:1)
		PE(16:0_18:2)
		PE(18:1_22:4)
		PE(O-16:0_20:2)
		PA(20:0_18:2)
		PE(16:0_20:2)
		PA(20:0_20:3)
		PA(18:0_20:2)
		PA(18:0_20:0)
		PE(P-18:0_16:1)
		PE(16:0_20:1)
		PE(O-16:0_20:3)
		PE(P-18:0_20:2)
		PE(18:1_20:1)
		PE(18:0_22:4)
		PA(20:0_22:4)
		PE(18:0_20:1)
		PG(18:0_18:0)
		PS(14:0_18:1)
		PS(18:1_20:2)
		PI(18:0_22:5)
		PA(18:0_18:3)
		PE(P-16:0_20:1)
		PI(16:0_22:4)
		PE(18:0_16:0)
		PE(16:0_22:6)

## Sheet: Table.S8
Table.S8 Phospholipids with p(corr)>0.6 from OPLS-DA analysis of MHCC97H(1) and Hep3B(2).
1	2	1|2
PC(18:0_20:4)+AcO	PC(18:1_20:2)+AcO	PI(18:0_22:6)
PC(16:0_20:4)+AcO	PE(16:0_16:0)	PG(18:1_18:1)
PC(18:1_20:4)+AcO	PE(P-16:0_16:1)	PG(16:0_18:0)
PE(O-16:0_22:4)	PE(P-16:0_20:3)	PI(18:0_22:4)
PC(18:2_20:4)+AcO	PE(P-16:1_18:1)	PI(18:1_16:1)
PE(18:2_20:2)	PE(P-18:1_16:1)	PE(18:2_16:1)
PC(18:0_18:0)+AcO	PE(P-18:1_18:1)	PE(18:1_16:1)
PA(16:0_16:0)	PG(14:0_18:1)	PS(16:0_16:1)
PA(18:0_16:1)	PG(16:0_16:1)	PC(18:1_16:1)+AcO
PA(18:0_18:1)	PG(16:0_18:1)	PI(18:1_18:1)
PA(18:1_18:1)	PG(18:0_18:1)	PS(20:0_16:1)
PE(P-18:2_20:4)	PI(16:0_22:5)	PS(20:0_20:1)
PC(18:1_20:5)+AcO	PI(18:0_20:2)	PE(P-16:0_18:1)
PE(18:2_18:2)	PI(18:1_20:3)	PS(18:1_20:1)
PE(P-18:1_16:0)	PI(18:1_20:4)	PC(16:1_18:1)+AcO
PI(18:0_20:4)	PS(14:0_20:3)	PC(16:0_16:1)+AcO
PG(20:0_20:4)	PS(16:0_18:0)	PG(18:0_16:1)
PE(18:2_20:3)	PS(18:0_16:1)	PC(18:1_18:1)+AcO
PG(18:1_20:2)	PS(18:1_18:1)	PE(P-16:0_18:0)
PE(18:2_20:4)	PS(18:1_18:2)	PI(18:1_22:4)
PA(16:0_18:1)		PS(18:0_18:1)
PE(P-18:0_16:0)		PE(P-18:0_16:1)
PA(18:0_18:0)		PE(18:1_20:1)
PA(16:0_16:1)		PG(18:0_18:0)
PC(16:0_22:5)+AcO		PS(14:0_18:1)
PI(16:0_20:1)		PS(18:1_20:2)
PA(20:0_16:1)		PI(18:0_22:5)
PA(18:1_16:1)		PI(16:0_22:4)
PG(16:0_22:6)		PE(18:0_16:0)
PC(18:1_20:3)+AcO
PE(O-16:0_18:1)
PA(20:0_18:1)
PC(14:0_18:2)+AcO
PE(16:0_22:5)
PE(O-18:0_22:4)
PS(18:0_18:2)
PE(18:0_20:4)
PE(18:1_20:4)
PE(P-18:1_22:4)
PC(18:2_20:2)+AcO
PC(18:0_18:1)+AcO
PC(18:0_20:1)+AcO
PI(18:0_20:0)
PE(O-18:0_18:1)
PA(18:0_20:3)
PE(16:0_20:4)
PE(P-16:0_20:2)
PE(18:0_20:3)
PS(14:0_14:0)
PA(18:0_22:4)
PE(16:0_22:4)
PE(O-16:0_20:1)
PC(18:2_20:3)+AcO
PE(O-16:0_16:1)
PE(P-16:0_22:4)
PA(18:0_20:1)
PE(18:1_22:5)
PS(20:0_20:4)
PA(16:0_14:0)
PE(P-18:1_20:5)
PA(20:0_20:2)
PA(18:0_18:2)
PI(20:0_18:1)
PE(16:0_18:2)
PE(18:1_22:4)
PE(O-16:0_20:2)
PA(20:0_18:2)
PE(16:0_20:2)
PA(20:0_20:3)
PA(18:0_20:2)
PA(18:0_20:0)
PE(16:0_20:1)
PE(O-16:0_20:3)
PE(P-18:0_20:2)
PE(18:0_22:4)
PA(20:0_22:4)
PE(18:0_20:1)
PA(18:0_18:3)
PE(P-16:0_20:1)
PE(16:0_22:6)

## Sheet: Table.S9
Table.S9 Phospholipids with p(corr)<-0.5 from OPLS-DA analysis of MHCC97H(1) and Hep3B(2).
1	2	1|2
PC(18:0_20:4)+AcO	PC(14:0_14:0)+AcO	PE(O-16:0_22:4)
PC(16:0_20:4)+AcO	PC(14:0_20:3)+AcO	PE(O-18:0_22:4)
PC(18:1_20:4)+AcO	PC(14:0_22:6)+AcO	PA(18:0_22:4)
PI(18:0_22:6)	PE(16:0_14:0)	PE(16:0_20:2)
PC(18:2_20:4)+AcO	PE(O-16:0_16:0)	PA(20:0_22:4)
PG(18:1_18:1)	PE(O-18:0_20:4)
PE(18:2_20:2)	PE(O-18:0_22:5)
PC(18:0_18:0)+AcO	PE(P-18:1_18:0)
PA(16:0_16:0)	PS(18:0_20:3)
PG(16:0_18:0)	PS(18:0_20:4)
PA(18:0_16:1)	PS(18:0_22:4)
PI(18:0_22:4)	PS(18:0_22:5)
PA(18:0_18:1)
PA(18:1_18:1)
PE(P-18:2_20:4)
PC(18:1_20:5)+AcO
PI(18:1_16:1)
PE(18:2_18:2)
PE(P-18:1_16:0)
PI(18:0_20:4)
PE(18:2_16:1)
PG(20:0_20:4)
PE(18:2_20:3)
PG(18:1_20:2)
PE(18:1_16:1)
PE(18:2_20:4)
PS(16:0_16:1)
PA(16:0_18:1)
PE(P-18:0_16:0)
PA(18:0_18:0)
PA(16:0_16:1)
PC(18:1_16:1)+AcO
PC(16:0_22:5)+AcO
PI(16:0_20:1)
PA(20:0_16:1)
PA(18:1_16:1)
PG(16:0_22:6)
PC(18:1_20:3)+AcO
PE(O-16:0_18:1)
PA(20:0_18:1)
PI(18:1_18:1)
PC(14:0_18:2)+AcO
PE(16:0_22:5)
PS(20:0_16:1)
PS(18:0_18:2)
PS(20:0_20:1)
PE(18:0_20:4)
PE(P-16:0_18:1)
PE(18:1_20:4)
PS(18:1_20:1)
PE(P-18:1_22:4)
PC(18:2_20:2)+AcO
PC(18:0_18:1)+AcO
PC(18:0_20:1)+AcO
PC(16:1_18:1)+AcO
PI(18:0_20:0)
PC(16:0_16:1)+AcO
PE(O-18:0_18:1)
PG(18:0_16:1)
PC(18:1_18:1)+AcO
PE(P-16:0_18:0)
PA(18:0_20:3)
PI(18:1_22:4)
PE(16:0_20:4)
PE(P-16:0_20:2)
PE(18:0_20:3)
PS(14:0_14:0)
PE(16:0_22:4)
PE(O-16:0_20:1)
PC(18:2_20:3)+AcO
PE(O-16:0_16:1)
PE(P-16:0_22:4)
PA(18:0_20:1)
PE(18:1_22:5)
PS(20:0_20:4)
PA(16:0_14:0)
PE(P-18:1_20:5)
PA(20:0_20:2)
PA(18:0_18:2)
PS(18:0_18:1)
PI(20:0_18:1)
PE(16:0_18:2)
PE(18:1_22:4)
PE(O-16:0_20:2)
PA(20:0_18:2)
PA(20:0_20:3)
PA(18:0_20:2)
PA(18:0_20:0)
PE(P-18:0_16:1)
PE(16:0_20:1)
PE(O-16:0_20:3)
PE(P-18:0_20:2)
PE(18:1_20:1)
PE(18:0_22:4)
PE(18:0_20:1)
PG(18:0_18:0)
PS(14:0_18:1)
PS(18:1_20:2)
PI(18:0_22:5)
PA(18:0_18:3)
PE(P-16:0_20:1)
PI(16:0_22:4)
PE(18:0_16:0)
PE(16:0_22:6)
